# Supplementary material for: Understanding the complexity of socioeconomic disparities in smoking prevalence in Sweden: a cross-sectional study applying intersectionality theory
Source: PubMed Central journal article supplement (PMC7880088; doi:10.1136/bmjopen-2020-042323), 2021-02-11
Supplement: bmjopen-2020-042323.draft_revisions.pdf [file bmjopen-2020-042323.draft_revisions.pdf]

# BMJ Open

BMJ Open is committed to open peer review. As part of this commitment we make the peer review history of every article we publish publicly available.

When an article is published we post the peer reviewers' comments and the authors' responses online. We also post the versions of the paper that were used during peer review. These are the versions that the peer review comments apply to.

The versions of the paper that follow are the versions that were submitted during the peer review process. They are not the versions of record or the final published versions. They should not be cited or distributed as the published version of this manuscript.

BMJ Open is an open access journal and the full, final, typeset and author-corrected version of record of the manuscript is available on our site with no access controls, subscription charges or pay-per-view fees (<http://bmjopen.bmj.com>).

If you have any questions on BMJ Open's open peer review process please email [info.bmjopen@bmj.com](mailto:info.bmjopen@bmj.com)

# BMJ Open

## Understanding the Complexity of Socioeconomic Disparities in smoking prevalence: Combining Intersectionality theory with analysis of individual heterogeneity and discriminatory accuracy (AIHDA)

|                               |                                                                                                                                                                                                                                                                                                                                                                                                                                                                                                                                                                                                                    |
|-------------------------------|--------------------------------------------------------------------------------------------------------------------------------------------------------------------------------------------------------------------------------------------------------------------------------------------------------------------------------------------------------------------------------------------------------------------------------------------------------------------------------------------------------------------------------------------------------------------------------------------------------------------|
| Journal:                      | <i>BMJ Open</i>                                                                                                                                                                                                                                                                                                                                                                                                                                                                                                                                                                                                    |
| Manuscript ID                 | bmjopen-2020-042323                                                                                                                                                                                                                                                                                                                                                                                                                                                                                                                                                                                                |
| Article Type:                 | Original research                                                                                                                                                                                                                                                                                                                                                                                                                                                                                                                                                                                                  |
| Date Submitted by the Author: | 05-Jul-2020                                                                                                                                                                                                                                                                                                                                                                                                                                                                                                                                                                                                        |
| Complete List of Authors:     | Axelsson Fisk, Sten; Lund University, Unit for Social Epidemiology, Department of Clinical Sciences<br>Lindstrom, Martin; Lunds University Faculty of Medicine, Unit for Social Medicine and Health Policy, Department of Clinical Sciences; Region Skåne, Centre for Primary Health Care Research<br>Perez-Vicente, Raquel; Lunds University Faculty of Medicine, Unit for Social Epidemiology, Department of Clinical Sciences<br>Merlo, Juan; Lunds University Faculty of Medicine, Unit for Social Epidemiology, Department of Clinical Sciences; Region Skåne, Malmö, Centre for Primary Health Care Research |
| Keywords:                     | SOCIAL MEDICINE, EPIDEMIOLOGY, Health policy < HEALTH SERVICES ADMINISTRATION & MANAGEMENT, PUBLIC HEALTH, STATISTICS & RESEARCH METHODS, Substance misuse < PSYCHIATRY                                                                                                                                                                                                                                                                                                                                                                                                                                            |
|                               |                                                                                                                                                                                                                                                                                                                                                                                                                                                                                                                                                                                                                    |

SCHOLARONE™  
Manuscripts

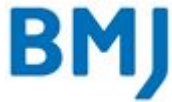

I, the Submitting Author has the right to grant and does grant on behalf of all authors of the Work (as defined in the below author licence), an exclusive licence and/or a non-exclusive licence for contributions from authors who are: i) UK Crown employees; ii) where BMJ has agreed a CC-BY licence shall apply, and/or iii) in accordance with the terms applicable for US Federal Government officers or employees acting as part of their official duties; on a worldwide, perpetual, irrevocable, royalty-free basis to BMJ Publishing Group Ltd ("BMJ") its licensees and where the relevant Journal is co-owned by BMJ to the co-owners of the Journal, to publish the Work in this journal and any other BMJ products and to exploit all rights, as set out in our [licence](#).

The Submitting Author accepts and understands that any supply made under these terms is made by BMJ to the Submitting Author unless you are acting as an employee on behalf of your employer or a postgraduate student of an affiliated institution which is paying any applicable article publishing charge ("APC") for Open Access articles. Where the Submitting Author wishes to make the Work available on an Open Access basis (and intends to pay the relevant APC), the terms of reuse of such Open Access shall be governed by a Creative Commons licence – details of these licences and which [Creative Commons](#) licence will apply to this Work are set out in our licence referred to above.

Other than as permitted in any relevant BMJ Author's Self Archiving Policies, I confirm this Work has not been accepted for publication elsewhere, is not being considered for publication elsewhere and does not duplicate material already published. I confirm all authors consent to publication of this Work and authorise the granting of this licence.

1  
2  
3 **Understanding the Complexity of Socioeconomic Disparities in**  
4 **smoking prevalence: Combining Intersectionality theory with**  
5 **analysis of individual heterogeneity and discriminatory accuracy**  
6 **(AIHDA)**  
7  
8  
9

---

10  
11 **Running Title:** Complex Disparities in smoking prevalence  
12

13  
14 **Journal BMJ-Open**  
15

16 Sten Axelsson Fisk, MD<sup>1</sup>

17 Martin Lindström MD, PhD, Prof<sup>2,3</sup>

18 Raquel Perez-Vicente. MSc<sup>1</sup>

19 Juan Merlo, MD, PhD, Prof<sup>1,3</sup>  
20  
21  
22

23 <sup>1</sup> Unit for Social Epidemiology, Department of Clinical Sciences, Lund University, Malmö, Sweden

24 <sup>2</sup> Unit for Social Medicine and Health Policy, Department of Clinical Sciences, Lund University, Malmö,  
25 Sweden

26 <sup>3</sup> Centre for Primary Health Care Research, Region Skåne, Malmö, Sweden  
27  
28  
29

30 **Corresponding author**

31 Sten Axelsson Fisk

32 Unit for Social Epidemiology, Lund University

33 Jan Waldenströms gata 35

34 214 28 Malmö

35 Sweden

36 Phone: +46-701-732506

37 Email: [sten.axelsson\\_fisk@med.lu.se](mailto:sten.axelsson_fisk@med.lu.se)  
38  
39  
40  
41  
42  
43  
44

45 **Words:** 3806 (excluding abstract, article summary, abbreviations and references)

46 **Tables:** 3

47 **Figures:** 2

48 **Supplemental material:** 2  
49  
50  
51  
52  
53  
54  
55  
56  
57  
58  
59  
60

## Abstract (250 words)

**Objectives:** Socioeconomic disparities in smoking prevalence remains a challenge to public health. The objective of this study was to present a simple methodology that displays intersectional patterns of smoking and quantify heterogeneities within groups to avoid inappropriate and potentially stigmatizing conclusions exclusively based on group averages.

**Setting:** This is a cross-sectional observational study based on data from the National Health Surveys for Sweden (2004-2016 and 2018) including 136 301 individuals. We excluded people under 30 years of age, or missing information on education, cohabitation or smoking habits. The final sample consisted on 110 044 individuals or 81.4% of the original sample.

**Outcome:** Applying intersectional analysis of individual heterogeneity and discriminatory accuracy (AIHDA), we investigated the risk of self-reported smoking across 72 intersectional strata defined by age, gender, educational achievement, civil and migration status.

**Results:** The distribution of smoking habit risk in the population was very heterogeneous. For instance, immigrant men aged 30–44 that lived alone and had low educational achievement had a prevalence of smoking of 54% (95%CI 44–64%), around 9 times higher than native cohabiting women aged 65–84 with high educational achievement that had a prevalence of 6% (95%CI 5–7%). The discriminatory accuracy of the information was moderate.

**Conclusion:** A more detailed, intersectional mapping of the socioeconomic and demographic disparities of smoking can assist in public health management aiming to eliminate this unhealthy habit from the community. Intersectionality theory together with AIHDA provides information that can guide resource allocation according to the concept proportionate universalism.

## Strengths and limitations

- We present an intersectional approach to study the multidimensional socioeconomic disparities in smoking prevalence in Sweden.
- In addition to differences between averages of intersectional strata, we quantify individual heterogeneities around those averages by presenting measurements of discriminatory accuracy.
- Our method is simpler but share crucial advantages with Multilevel AIHDA, such as improved health mapping and assessment of intersectional interaction.
- We use pooled data from Swedish National Health Survey with participation rates spanning from 60.8% 2004 to 42.1% 2018.
- Analysis of Individual Heterogeneity and Discriminatory Accuracy (AIHDA) is a suitable tool to inform whether interventions to reduce socioeconomic health disparities should be universal or target specific groups.

## Abbreviations

AIHDA=Analysis of Individual Heterogeneity and Discriminatory Accuracy, AUC=Area

Under receiving operator characteristics Curve, CI=Confidence Interval, DA=Discriminatory

Accuracy, OR=Odds Ratio, PR=Prevalence Ratio, RR=Relative Risk

For peer review only

## Introduction

A higher prevalence of smoking among individuals with low socioeconomic position (SEP) compared to higher SEP has been reported in several studies in Sweden [1] and globally [2-5]. The higher prevalence results both from higher rates of initiation [6] and lower rates of successful smoking cessation [7]. In addition to this, other factors like country of birth [8], civil status [9] as well as the age cohort and gender of an individual influence the probability of smoking [10]. Overall the socioeconomic determinants of smoking are multidimensional but few studies until now have empirically confronted this heterogeneity using an intersectional perspective [11-15].

### Intersectionality theory, proportionate universalism, and the analysis of individual heterogeneity and discriminatory accuracy (AIHDA)

Launching smoking cessation campaigns is a logical step to reduce socioeconomic differences in smoking prevalence, but the poor evidence that exist [16] suggest that while such interventions may be efficient when it comes to reducing overall smoking prevalence, they seem rather inefficient when it comes to reducing socioeconomic disparities in smoking [17]. Marmot and Bell claim [18] that interventions to reduce socioeconomic health disparities need to address all levels of society and not only those who are worst off. They argue that an efficient approach may be *proportionate universalism* [18, 19] where interventions are universal, i.e. directed towards the whole population (such as tobacco taxes, smoking bans in public) but proportionately more intense among population subgroups with augmented needs where targeted interventions can be launched (i.e. information campaigns in specific neighbourhoods or populations such as pregnant women). However, as argued elsewhere [19-21] successful and efficient implementation of *proportionate universalism* requires development and application of appropriate theories and epidemiologic methodologies.



1  
2  
3  
4  
5 Intersectionality theory, originating in gender and anti-colonial research [22] is a critical  
6 social theory that stresses the need for simultaneous consideration of different social  
7 dimensions such as racialized identity, gender and class in order to properly understand the  
8 social context acting on individuals. According to intersectionality theory, the social reality is  
9 shaped by overlapping systems of oppression that influence distribution of resources and  
10 power in society.  
11  
12  
13  
14  
15  
16  
17  
18  
19  
20

21 The inclusion of intersectionality in epidemiology and public health has been promoted by  
22 several scholars [23-26]. A direct consequence of this approach in quantitative analyses is the  
23 study of multiple intersectional strata defined by combinations of different social dimensions,  
24 since the effect of each social dimension on an individual is intrinsically dependent on the  
25 other social identities of that person. This contrasts with the common approach considering  
26 one social dimension at the time. Thereby, the intersectional approach may enrich public  
27 health research by providing an improved mapping of socioeconomic health disparities. Such  
28 socioeconomic heterogeneity can be analyzed by quantifying differences between  
29 intersectional strata averages. However, we [20, 25-28] and other scholars [29-31] stress the  
30 added relevance of simultaneously quantifying the discriminatory accuracy (DA) of the  
31 intersectional categorization for specific outcomes. An intersectional map combined with  
32 information on its DA provides an improved picture of the socioeconomic heterogeneity  
33 existing in the society. This approach can be used to inform interventions according to the  
34 concept of proportionate universalism, where universal measures are paired with actions  
35 directed to specific intersectional strata in proportion to their level of risk [18]. The extent to  
36 which a universal intervention needs to be proportional can be evaluated by the DA of the  
37  
38  
39  
40  
41  
42  
43  
44  
45  
46  
47  
48  
49  
50  
51  
52  
53  
54  
55  
56  
57  
58  
59  
60

1  
2  
3 intersectional strata. A low DA suggests the need for universal interventions while a high DA  
4  
5 support more selective interventions.  
6  
7  
8  
9

10 Adopting a quantitative perspective, in the present study we aim to illustrate how a more  
11  
12 precise intersectional categorisation combined with the analysis of individual heterogeneity  
13  
14 and DA (AIHDA) improves our understanding of socioeconomic inequalities in smoking and  
15  
16 facilitates the application of proportionate universalism. We do so by analysing the National  
17  
18 Health Surveys (NHS) for Sweden.  
19  
20  
21  
22

## 23 **Methods**

### 24 **Study population**

25  
26  
27  
28  
29  
30 In this cross-sectional observational study, we used data from all the 14 National Health  
31  
32 Surveys (NHS) for Sweden for the years 2004–2016 and 2018  
33  
34 ([https://www.folkhalsomyndigheten.se/the-public-health-agency-of-sweden/public-health-  
35 reporting/](https://www.folkhalsomyndigheten.se/the-public-health-agency-of-sweden/public-health-reporting/)). The NHS is an ongoing collaborative project between the Public Health Agency  
36  
37 of Sweden and the Swedish Association of Local Authorities and Regions (SALAR). The  
38  
39 NHS record self-reported information on health, lifestyle and living conditions. The study has  
40  
41 been conducted annually between 2004 and 2016 and comprised a random sample of 20,000  
42  
43 individuals aged 16–84 years. After 2016 the survey is conducted biannually but with a  
44  
45 random sample of 40,000 individuals. Response rates span from 60.8% 2004 to 42.1% 2018.  
46  
47  
48  
49 Using a unique personal identification number, the Swedish authorities linked the sample  
50  
51 surveys to national register administered at Statistics Sweden to obtain demographical and  
52  
53 socioeconomic information.  
54  
55  
56  
57  
58  
59  
60

1  
2  
3 For our study we pooled the data from the last 14 surveys, which rendered a sample of  
4  
5 136 301 individuals. Thereafter, we excluded people under 30 years of age, or missing  
6  
7 information on education, cohabitation or smoking habits. The final sample consisted on  
8  
9 110 044 individuals or 81.4% of the original sample (Figure 1).  
10  
11

12  
13 The present investigation was approved by the Swedish Ethical Review Authority (Dnr:  
14  
15 2019-01793) and the data safety committee at the Public Health Agency of Sweden.  
16  
17

### 18 Patient and public involvement

19  
20 All data from NHS provided to researchers is anonymised, so study participants cannot be  
21  
22 identified. The study participants were not involved in the research process.  
23  
24

### 25 Assessment of variables

26  
27 Smoking status was assessed based on the answer to the question “Do you smoke?”, if the  
28  
29 person answered “Yes” or “Yes, sometimes”, the individual was categorized as a smoker, if  
30  
31 the respondent answered “No” the individual was considered a non-smoker.  
32  
33

34  
35 We categorized *age* into three groups: 30-44, 45-64 and 65-84-year-old. We classified gender  
36  
37 as a binary variable distinguishing between men and women as more specific information on  
38  
39 gender was not available in the questionnaire. We classified *educational achievement* into  
40  
41 three categories, as low if the respondent had not completed three years of high school  
42  
43 education, as middle if they had high school education but less than three years of education  
44  
45 after high school and high if the respondent had at least three years of education after high  
46  
47 school. Throughout 2008-2016 respondents were asked “with whom do you share  
48  
49 household?”, we defined *civil status* as living alone if the respondent answered “with no  
50  
51 one”, otherwise as cohabiting. In 2018 that question was not asked so individuals were  
52  
53 defined in the same way according to the information provided by Statics Sweden. We  
54  
55 classified *migration status* as native (i.e., born in Sweden) or immigrant.  
56  
57  
58  
59  
60

1  
2  
3 As a way of operationalising intersectional contexts, we created 72 strata by combining the  
4 three categories of age, the two of gender, the three of educational achievement, the two of  
5 migration status and the two categories of civil status. We used 30–45-year-old, native men  
6 cohabiting and with high educational achievement as the reference in the comparisons, as this  
7 group was assumed to occupy the position of greatest structural privilege. We also included  
8 the survey year of the participants using 2018 as reference in all comparisons.  
9  
10  
11  
12  
13  
14  
15

### 16 17 Statistical analyses

18  
19  
20 The first step in our analysis was to obtain the trends in smoking prevalence and the trends in  
21 socioeconomic and demographic gradients in smoking between 2004 and 2018 (see  
22 supplementary information S1). Thereafter, we performed a stratified analysis aimed to  
23 provide a detailed map of the prevalence (i.e., absolute risk) and 95% confidence intervals  
24 (CI) of smoking across the intersectional strata. This stratification allows comparing the  
25 prevalence of smoking in different strata without any reference (Figure 2).  
26  
27  
28  
29  
30  
31  
32  
33

34 Thereafter, we performed seven consecutive regression analyses, modelling smoking as the  
35 dependent variable and survey year as well as the different demographical and socioeconomic  
36 dimensions alone and in combination as explanatory variables. The use of logistic regression  
37 to obtain odds ratios (OR) is common but the OR is a good estimation of the relative risk  
38 (RR) only when the prevalence of the outcome is very small (rare event assumption) [32].  
39 Therefore, for the analysis, rather than logistic regression to obtain ORs, we used Cox  
40 proportional hazards regression with a constant follow-up time equal to one to obtain  
41 prevalence ratios (PR) [33] with 95% CI.  
42  
43  
44  
45  
46  
47  
48  
49  
50  
51  
52

53 Model 1 included only survey year, model 2 added age, model 3 added gender, model 4  
54 added educational achievement, model 5 added migration status and model 6 added civil  
55 status and thus included all the variables that defined the intersectional strata. Finally, the  
56  
57  
58  
59  
60

1  
2  
3 intersectional model 7 included the same variables as model 6 but in the form of a  
4  
5 multicategorical variable with 72 intersectional strata. Here, we used the 30–45-year-old,  
6  
7 native men cohabiting and with high educational achievement as the reference in the  
8  
9 comparison.  
10

11  
12 For each model, we quantified its DA by means of the area under the receiver operator  
13  
14 characteristics curve (AUC) [34]. The AUC measures the accuracy of the information  
15  
16 provided by the variables in the model for discriminating individuals who smoke from those  
17  
18 who don't. The AUC takes a value between 0.5 and 1, where 1 indicates perfect  
19  
20 discrimination and 0.5 means that the studied variables have no DA at all. The AUC can even  
21  
22 be used to qualify the size of the intersectional differences. Rather than evaluating the  
23  
24 absolute risk differences between strata, using the AUC we assess the overlapping of the  
25  
26 individual risk predictions (based on the intersectional strata) between smokers and non-  
27  
28 smokers.  
29  
30  
31  
32

33 There is no fully established practical guideline for the interpretation of the size of the AUC  
34  
35 as a measure of DA when analysing intersectional inequalities. However, based on the  
36  
37 classification provided by Hosmer and Lemeshow [35] we qualify intersectional inequalities  
38  
39 according to the DA as (i) “absent or very small” (AUC= 0.5–0.6), (ii) “moderate” (AUC  
40  
41 >0.6–≤ 0.7), (iii) “large” (AUC >0.7– ≤ 0.8) and (iv) “very large” (AUC >0.8). Evaluating  
42  
43 intersectional differences using only strata prevalence is insufficient as it does not consider  
44  
45 any overlapping between the strata. Therefore, the AUC provides fundamental information  
46  
47 for evaluation of group differences [36].  
48  
49  
50

51  
52 We further calculated the incremental change in the AUC value ( $\Delta$ -AUC) between the  
53  
54 models. The  $\Delta$ -AUC quantifies the improvement in the DA obtained by a model, in relation  
55  
56 to the previous model [21]. The categorical intersectional variable in model 7 allows for the  
57  
58  
59  
60

1  
2  
3 capturing of interaction of effects. If any such interaction exists, the DA of model 7 will  
4  
5 increase in comparison with model 6 and the  $\Delta$ -AUC will thus be positive.  
6

7 We used STATA version 15.1 and IBM SPSS (Statistical Package for the Social Sciences)  
8  
9 version 25 for PC to perform all statistical analyses.  
10  
11  
12

## 13 14 **Results**

15  
16  
17 Over the whole study period, the prevalence of smoking was 18%. The visual analysis of the  
18  
19 trends indicated that the prevalence of smoking monotonically decreased in Sweden from  
20  
21 25.0% in 2004 to around 11.1% in 2018. We observed consistent differences between groups  
22  
23 defined by age, gender, country of birth, educational achievement and civil status. However,  
24  
25 in absolute terms, such differences were similar along the years (see supplementary  
26  
27 information S1).  
28  
29

30  
31 Table 1 presents the prevalence of smokers and non-smokers across the included  
32  
33 socioeconomic and demographic variables as well as across survey years. It indicates that the  
34  
35 prevalence of smoking was higher in individuals aged 45-64 years (20.6%) than in both  
36  
37 younger (19.8%) and older people (12.4%). Women and men had similar prevalence of  
38  
39 smoking (17.9% vs 17.8%). As expected, smoking was more common among people with  
40  
41 low (21.7%) and medium (17.0%) educational achievement compared to people with high  
42  
43 educational achievement (11.9%). The prevalence of smoking was higher among immigrants  
44  
45 (23.9%) than among natives (17.0%) and the same was true for individuals living alone  
46  
47 (24.1%) compared to those who were cohabiting (16.5%).  
48  
49  
50  
51

52  
53 Figure 2 shows the prevalence of smoking across the intersectional strata. We observed the  
54  
55 highest prevalence (54%) among 30-44-year-old immigrant men with low educational  
56  
57 achievement and living alone, and the lowest prevalence (6%) among 65-84-year-old native  
58  
59 women with high educational achievement and living together. The reference stratum (i.e.,  
60

1  
2  
3 30–45-year-old, native men cohabiting and with high educational achievement) used in the  
4  
5 relative comparisons (Table 2) presented a smoking prevalence of about 12%.

6  
7  
8 The table 3 informs that the RR of smoking decreases with age, being lowest in the old  
9  
10 population. This age gradient is clear after adjustment for the other variables in the model 6.  
11  
12 Low educational achievement, being immigrant and living alone was associated with a higher  
13  
14 smoking risk. However, there were no age-adjusted gender differences. The AUC in the  
15  
16 model including only survey year was 0.58. In the age adjusted model 2, the AUC was 0.60  
17  
18 and it did not increase when gender was included in model 3. The AUC increased by 0.04  
19  
20 units when including education. It did not increase when adding migration status but further  
21  
22 increased by 0.01 units when including civil status. The AUC of the intersectional model 7  
23  
24 was 0.65, which is identical to the AUC of model 6 indicating an absence of intersectional  
25  
26 interaction.  
27  
28  
29  
30  
31

32  
33 Table 2 shows the 10 strata with the lowest and the 10 strata with the highest RRs of smoking  
34  
35 using the strata of young native men with high educational achievement and cohabiting as  
36  
37 reference. The lowest RR= 0.55 was observed in older native women with high educational  
38  
39 achievement and cohabiting and the highest RR= 4.45 was observed in young immigrant men  
40  
41 with low educational achievement and living alone. When comparing with the reference  
42  
43 stratum of native young men with high educational achievement and cohabiting, we observed  
44  
45 that low educational achievement, being immigrant and living alone were respectively  
46  
47 present in seven, eight and nine of the ten strata with the highest risk of smoking (see the  
48  
49 Supplementary information S2 for the complete list of RR-values).  
50  
51  
52  
53  
54  
55  
56  
57  
58  
59  
60

## Discussion

### Main findings

Our study provides an improved mapping of the distribution of the smoking habit in Sweden compared to unidimensional analyses. Rather than focusing on single socioeconomic and demographical variables, we use an intersectional AIHDA analysis that uncovers the socioeconomic and demographical heterogeneity existing in the country. We also applied the AUC to obtain information on the accuracy of the intersectional grouping for identifying individuals according to their smoking status. We found a moderate AUC= 0.65, which indicates that individual risk of smoking considerably overlaps between the intersectional strata.

We found that the stratum-specific risks were due to the main effects of the different variables used to define the intersectional strata without any interactive component. In fact, the AUC was the same whether the variables were included in the model separately or as a multicategorical variable that allows detection of interaction effects, if they exist.

We found intersectional strata with a rather high RR of smoking. For instance, the prevalence of smoking in young immigrant men with low educational achievement and living alone was 54%. Interestingly, while high educational achievement generally prevents smoking, young immigrant women that lived alone had a relative risk of 2.87 (1.86-4.42) despite their high educational achievement. This indicates that the protective effect of high education may depend on other variables such as migration status and gender. Our finding could hypothetically reflect both smoking culture in the country of birth of the individual or that discrimination on the basis of gender or migration status may contribute to making education a poorer indicator of socioeconomic position in this group.



## Relation to previous studies

In spite of the use of different definitions and measurements of smoking habits as well as the use of different indicators of socioeconomic position, many previous publications have shown the existence of socioeconomic, ethnic and demographical differences in smoking [2, 4, 37]. However, as far we known, only a few have considered the intersectional approach [11, 14, 15]. From this perspective our study provides an original contribution. The heterogeneous socioeconomic and demographic distribution of smoking prevalence we found in Sweden is in accordance with recent intersectional research on smoking cessation in the U.S. adult population [15].

Which SEP-indicator that is used influence the hypothesized mediating pathways. In the present study we used educational achievement. High education may influence smoking through both direct effect, such as increased understanding of detrimental health effects of smoking, and indirect effects such as social and material circumstances [38]. The educational gradient, however, might partly be explained by income disparities between people with high or low education [39]. Since income and education capture different aspects of social class, it can be motivated to include both variables in an intersectional matrix. However, we wanted to present a parsimonious model that can be easily applied in public health reports.

Educational achievement is the preferred indicator of socioeconomic position in previous public health reports in Sweden [40]. We performed a sensitivity analysis where we included income instead of education and the results were very similar.

In a comparison of the relative importance of low education on smoking prevalence across age- and gender groups in Denmark and Sweden, Eek et al. found that the effect of low education on smoking prevalence and continuation of smoking was strongest among younger women in Sweden, indicating a failure of tobacco prevention interventions to reach this group

1  
2  
3 [1]. While immigrant men were clearly overrepresented among the strata with highest  
4 prevalence of smoking, this was not the case for women. This pattern was also found by  
5 Lindström et al in a study from southern Sweden showing lower rates of smoking among men  
6 born in Sweden, but higher rates of smoking among women born in Sweden compared to  
7 men and women from most other country groups [8]. The distribution of smoking prevalence  
8 across age groups we found is similar to the pattern observed by Ali et al in a study from  
9 southern Sweden [41].  
10  
11  
12  
13  
14  
15  
16  
17  
18  
19  
20

### 21 Strengths and limitations

22  
23  
24 The cross-sectional and observational character of this study prevents causal conclusions.  
25 However, the variables included in our analyses are to a little extent effected by smoking  
26 status, so the causal direction can be presumed to go from sociodemographic variables  
27 towards smoking rather than the opposite.  
28  
29  
30  
31  
32

33  
34 Another weakness in our study is that the participation rates were rather low, especially  
35 during the last years. An analyses of the non-participants performed by Statistics Sweden  
36 shows that people with low income, people born outside Sweden and people living alone  
37 were less likely to be responders [42]. Therefore, if the prevalence of smoking is higher in  
38 non-participants, our analysis may have underestimated the existing socioeconomic  
39 differences. We also performed a sensitivity analysis in which we utilized data that had been  
40 weighted by Statistics Sweden in order to reduce skewness resulting from non-participating  
41 individuals. The variables used to perform the weighting were age, gender, educational level,  
42 country of birth, civil status and urban/rural [43]. This analysis yielded very similar results,  
43 which was expected since the intersectional variable included the weighting variables except  
44 rural/urban. Finally, our study represents the Swedish circumstances so the AIHDA-approach  
45 needs to be replicated in different contexts and for different health outcomes.  
46  
47  
48  
49  
50  
51  
52  
53  
54  
55  
56  
57  
58  
59  
60

## Implications and future studies

There is a growing body of literature focusing on how to perform quantitative intersectional research [24, 44], with the emergence of multilevel AIHDA (MAIHDA) as a recent example [25, 26, 30]. However, in spite of providing complementary information [30], the fixed effects AIHDA approach we use in our study is rather accessible and share crucial advantages of the MAIHDA. First, the AIHDA provides an intersectional mapping that is more appropriate than unidimensional analyses to identify specifically vulnerable population groups in which interventions could be effective. Second, by going beyond average probabilistic measurements (i.e., prevalence) and also analysing DA we get a quantification of the heterogeneity around the averages [36]. From the AIHDA we found that the DA of our intersectional model was only moderate which indicates the necessity for universal interventions due to a large unexplained heterogeneity. However, we also identified that the three most vulnerable groups (i.e., strata) included immigrant men with low education younger than 65 years. This finding suggest that special preventive measures should be directed to these groups. Research methods that actively involves members of marginalized groups and has the explicit purpose to result in public health improvements are developing and could be one way forward [45]. In addition to this, availability of smoking cessation aid, political and economic changes to reduce socioeconomic disparities between immigrants and natives are potential strategies.

## Conclusions

Compared with studies focused on single variables, the intersectional AIHDA offers a better mapping of the socioeconomic and demographical distribution of smoking in Sweden. However, the moderate DA found in the AIHDA analysis suggested the existence of

1  
2  
3 substantial unexplained heterogeneity in smoking risk within the different intersectional strata  
4 defined by age, gender, education, civil status and migration status. An intersectional AIHDA  
5 approach is necessary to understand the existing socioeconomic and demographic complexity  
6 influencing smoking behaviour. Future studies should identify preventive measures that are  
7 guided by proportionate universalism to find practical ways forwards to reduce intersectional  
8 disparities in smoking prevalence.  
9  
10  
11  
12  
13  
14  
15  
16  
17  
18

## 19 **Footnotes**

### 22 **Funding**

23  
24 This work was supported by grants to Juan Merlo (PI) from the Swedish Research Council  
25 (Vetenskapsrådet) for the project “*Multilevel Analyses of Individual Heterogeneity:  
26 innovative concepts and methodological approaches in Public Health and Social  
27 Epidemiology*” (<https://www.swecris.se/betasearch/details/project/201701321VR?lang=en>  
28  
29  
30

31 Project id: 2017-01321.) The study was also supported by a grant for advanced doctoral  
32 studies from the Faculty of Medicine at Lund University (Dnr 2020/1125, SAF)  
33  
34  
35

36 The funders had no role in study design, data collection and analysis, decision to publish, or  
37 preparation of the manuscript.  
38  
39  
40  
41  
42

43 We acknowledge the staff and participants of all the national health surveys that has made  
44 this study possible.  
45  
46  
47  
48

### 49 **Contributors**

50  
51 SAF and JM had the original idea of the study. SAF wrote the initial version of the paper,  
52 SAF, JM, RPV and ML participated in the design, analysis, interpretation of data and  
53 drafting of the article. All authors approved the final version to be published. JM is the  
54 guarantor of the article.  
55  
56  
57  
58  
59  
60

### Conflict of interest

There are no conflicts of interest.

### Data sharing statement

The original databases from the Public Health Agency of Sweden used in this study are protected by strict rules of confidentiality that cover sensitive individual information including data regarding health and health behaviours. The data can be made available for research after review by a regional Ethics Committee and the Public Health Agency's own safety committee.

### Ethics approval

The present investigation was approved by the Swedish Ethical Review Authority (Dnr: 2019-01793) and the data safety committee at the Public Health Agency of Sweden.

### License statement

I, the Submitting Author has the right to grant and does grant on behalf of all authors of the Work (as defined in the below author licence), an exclusive licence and/or a non-exclusive licence for contributions from authors who are: i) UK Crown employees; ii) where BMJ has agreed a CC-BY licence shall apply, and/or iii) in accordance with the terms applicable for US Federal Government officers or employees acting as part of their official duties; on a worldwide, perpetual, irrevocable, royalty-free basis to BMJ Publishing Group Ltd ("BMJ") its licensees and where the relevant Journal is co-owned by BMJ to the co-owners of the Journal, to publish the Work in any BMJ products and to exploit all rights, as set out in our licence.

## References

- [1] Eek F, Ostergren P-O, Diderichsen F, *et al.* Differences in socioeconomic and gender inequalities in tobacco smoking in Denmark and Sweden; a cross sectional comparison of the equity effect of different public health policies. *BMC public health* 2010;**10**:9-9.
- [2] Kuntz B, Lampert T. Educational differences in smoking among adolescents in Germany: what is the role of parental and adolescent education levels and intergenerational educational mobility? *International journal of environmental research and public health* 2013;**10**(7):3015-3032.
- [3] Härkönen J, Lindberg M, Karlsson L, *et al.* Education is the strongest socio-economic predictor of smoking in pregnancy. *Addiction* 2018;**113**(6):1117-1126.
- [4] Hiscock R, Bauld L, Amos A, *et al.* Socioeconomic status and smoking: a review. *Annals of the New York Academy of Sciences* 2012;**1248**(1):107-123.
- [5] Graham H. Gender and class as dimensions of smoking behaviour in Britain: insights from a survey of mothers. *Social science & medicine (1982)* 1994;**38**(5):691-698.
- [6] Joffer J, Burell G, Bergstrom E, *et al.* Predictors of smoking among Swedish adolescents. *BMC public health* 2014;**14**:1296.
- [7] Gilman SE, Martin LT, Abrams DB, *et al.* Educational attainment and cigarette smoking: a causal association? *International journal of epidemiology* 2008;**37**(3):615-624.
- [8] Lindstrom M, Sundquist J. Ethnic differences in daily smoking in Malmo, Sweden. Varying influence of psychosocial and economic factors. *European journal of public health* 2002;**12**(4):287-294.
- [9] Lindstrom M, Giordano GN. Changes in Social Capital and Cigarette Smoking Behavior Over Time: A Population-Based Panel Study of Temporal Relationships. *Nicotine & tobacco research : official journal of the Society for Research on Nicotine and Tobacco* 2016;**18**(11):2106-2114.
- [10] Ramstrom L, Borland R, Wikmans T. Patterns of Smoking and Snus Use in Sweden: Implications for Public Health. *Int J Environ Res Public Health* 2016;**13**(11).
- [11] Amroussia N, Pearson JL, Gustafsson PE. What drives us apart? Decomposing intersectional inequalities in cigarette smoking by education and sexual orientation among U.S. adults. *International journal for equity in health* 2019;**18**(1):109.
- [12] Mena E, Bolte G, Group AGS. Intersectionality-based quantitative health research and sex/gender sensitivity: a scoping review. *International journal for equity in health* 2019;**18**(1):199-199.
- [13] Bilal U, Beltrán P, Fernández E, *et al.* Gender equality and smoking: a theory-driven approach to smoking gender differences in Spain. *Tobacco control* 2016;**25**(3):295-300.
- [14] Aguirre CG, Bello MS, Andrabi N, *et al.* Gender, Ethnicity, and Their Intersectionality in the Prediction of Smoking Outcome Expectancies in Regular Cigarette Smokers. *Behavior modification* 2016;**40**(1-2):281-302.
- [15] Potter LN, Lam CY, Cinciripini PM, *et al.* Intersectionality and Smoking Cessation: Exploring Various Approaches for Understanding Health Inequities. *Nicotine & Tobacco Research* 2020.
- [16] Vilhelmsson A, Ostergren PO. Reducing health inequalities with interventions targeting behavioral factors among individuals with low levels of education - A rapid review. *PloS one* 2018;**13**(4):e0195774.

- 1  
2  
3 [17] Wendel-Vos GC, Dutman AE, Verschuren WM, *et al.* Lifestyle factors of a five-year  
4 community-intervention program: the Hartslag Limburg intervention. *American journal of*  
5 *preventive medicine* 2009;**37**(1):50-56.
- 6 [18] Marmot M, Bell R. Fair society, healthy lives. *Public health* 2012;**126** Suppl 1:S4-  
7 s10.
- 8 [19] Carey G, Crammond B, De Leeuw E. Towards health equity: a framework for the  
9 application of proportionate universalism. *International journal for equity in health*  
10 2015;**14**:81.
- 11 [20] Wemrell M, Bennet L, Merlo J. Understanding the complexity of socioeconomic  
12 disparities in type 2 diabetes risk: a study of 4.3 million people in Sweden. *MJ Open Diabetes*  
13 *Research and Care* 2019;**9**;7:e000749.
- 14 [21] Merlo J, Wagner P, Leckie G. A simple multilevel approach for analysing  
15 geographical inequalities in public health reports: The case of municipality differences in  
16 obesity. *Health & place* 2019;**58**:102145.
- 17 [22] K C. Demarginalizing the intersection of race and sex: a Black feminist critique of  
18 antidiscrimination doctrine, feminist theory and antiracist politics. *University of Chicago*  
19 *Legal Forum* 1989(139).
- 20 [23] Bauer GR. Incorporating intersectionality theory into population health research  
21 methodology: challenges and the potential to advance health equity. *Soc Sci Med*  
22 2014;**110**:10-17.
- 23 [24] Bowleg L. When Black plus Lesbian plus Woman not equal Black Lesbian Woman:  
24 The methodological challenges of qualitative and quantitative intersectionality research. *Sex*  
25 *Roles* 2008;**59**(5-6):312-325.
- 26 [25] Merlo J. Multilevel analysis of individual heterogeneity and discriminatory accuracy  
27 (MAIHDA) within an intersectional framework. *Social science & medicine* (1982)  
28 2018;**203**:74-80.
- 29 [26] Wemrell M, Mulinari S, Merlo J. An intersectional approach to multilevel analysis of  
30 individual heterogeneity (MAIH) and discriminatory accuracy. *Social science & medicine*  
31 (1982) 2017;**178**:217-219.
- 32 [27] Axelsson Fisk S, Mulinari S, Wemrell M, *et al.* Chronic Obstructive Pulmonary  
33 Disease in Sweden: An intersectional multilevel analysis of individual heterogeneity and  
34 discriminatory accuracy. *SSM Popul Health* 2018;**4**:334-346.
- 35 [28] Persmark A, Wemrell M, Zettermark S, *et al.* Precision public health: Mapping  
36 socioeconomic disparities in opioid dispensations at Swedish pharmacies by Multilevel  
37 Analysis of Individual Heterogeneity and Discriminatory Accuracy (MAIHDA). *PLoS One*  
38 2019;**14**(8):e0220322.
- 39 [29] Evans CR, Erickson N. Intersectionality and depression in adolescence and early  
40 adulthood: A MAIHDA analysis of the national longitudinal study of adolescent to adult  
41 health, 1995-2008. *Soc Sci Med* 2019;**220**:1-11.
- 42 [30] Evans CR, Leckie G, Merlo J. Multilevel versus single-level regression for the  
43 analysis of multilevel information: The case of quantitative intersectional analysis. *Social*  
44 *science & medicine* (1982) 2019:112499.
- 45 [31] Evans CR, Williams DR, Onnela JP, *et al.* A multilevel approach to modeling health  
46 inequalities at the intersection of multiple social identities. *Soc Sci Med* 2017.
- 47 [32] Davies HT, Crombie IK, Tavakoli M. When can odds ratios mislead? *BMJ (Clinical*  
48 *research ed)* 1998;**316**(7136):989-991.
- 49 [33] Barros AJ, Hirakata VN. Alternatives for logistic regression in cross-sectional studies:  
50 an empirical comparison of models that directly estimate the prevalence ratio. *BMC Med Res*  
51 *Methodol* 2003;**3**:21.
- 52  
53  
54  
55  
56  
57  
58  
59  
60

- 1  
2  
3 [34] Pepe MS, Janes H, Longton G, *et al.* Limitations of the odds ratio in gauging the  
4 performance of a diagnostic, prognostic, or screening marker. *American journal of*  
5 *epidemiology* 2004;**159**(9):882-890.
- 6 [35] Hosmer DW, Lemeshow S. Applied logistic regression. 2nd ed. New York: Wiley  
7 2000.
- 8 [36] Merlo J, Wagner P, Leckie G. A simple multilevel approach for analysing  
9 geographical inequalities in public health reports: The case of municipality differences in  
10 obesity. *Health Place* 2019;**58**:102145.
- 11 [37] Landberg J, Ramstedt M, Sundin E. Socioekonomiska skillnader i beroende och  
12 utsatthet för andras användning av alkohol, narkotika och tobak. Stockholm:  
13 Centralförbundet för alkohol- och narkotikaupplysning 2018.
- 14 [38] Östergren O. Understanding the educational gradient in Mortality: Department of  
15 Sociology, Stockholm University 2017.
- 16 [39] Cutler DM, Lleras-Muney A. Understanding differences in health behaviors by  
17 education. *Journal of health economics* 2010;**29**(1):1-28.
- 18 [40] Folkhälsomyndigheten SkoR. Regional comparisons public health 2019.  
19 [www.folkhalsomyndigheten.se/publicerat-material](http://www.folkhalsomyndigheten.se/publicerat-material) 2018.
- 20 [41] Ali SM, Chaix B, Merlo J, *et al.* Gender differences in daily smoking prevalence in  
21 different age strata: A population-based study in southern Sweden. *Scandinavian journal of*  
22 *public health* 2009;**37**(2):146-152.
- 23 [42] Franzén M. Extra bortfallsanalys. Statistics Sweden 2018.
- 24 [43] Franzén M. Kalibreringsrapport Nationellt Urval. Stockholm: Statistics Sweden 2015.
- 25 [44] McCall L. The complexity of intersectionality. *Signs: Journal of women in culture*  
26 *and society* 2005;**30**(3):1771-1800.
- 27 [45] Andrews JO, Newman SD, Heath J, *et al.* Community-based participatory research  
28 and smoking cessation interventions: a review of the evidence. *Nursing Clinics*  
29 2012;**47**(1):81-96.
- 30  
31  
32  
33  
34  
35  
36  
37  
38  
39  
40  
41  
42  
43  
44  
45  
46  
47  
48  
49  
50  
51  
52  
53  
54  
55  
56  
57  
58  
59  
60



## Tables

**Table 1.** Distribution (prevalence) of smokers across categories of age, gender, education, migration and civil status in the 110,044 participants in the Swedish National Health Surveys (2004 – 2018). Values are number (and percentage) of individuals.

|              | Non smokers     | Smokers         |
|--------------|-----------------|-----------------|
| 30-44        | 22,799 (80.23%) | 5,618 (19.77%)  |
| 45-64        | 38,024 (79.41%) | 9,862 (20.59%)  |
| 65-84        | 29,575 (87.65%) | 4,166 (12.35%)  |
| Female       | 48,782 (82.08%) | 10,653 (17.92%) |
| Male         | 41,616 (82.23%) | 8,993 (17.77%)  |
| Low          | 38,791 (78.32%) | 10,738 (21.68%) |
| Middle       | 27,716 (83.02%) | 5,670 (16.98)   |
| High         | 23,891 (88.06%) | 3,238 (11.94%)  |
| Immigrant    | 10,410 (76.07%) | 3,274 (23.93%)  |
| Native       | 79,988 (83.01%) | 16,372 (16.99%) |
| Cohabiting   | 75,625 (83.48%) | 14,964 (16.52%) |
| Living Alone | 14,773 (75.93%) | 4,682 (24.07%)  |
| 2004         | 6,803 (75.03%)  | 2,264 (24.97%)  |
| 2005         | 3,339 (75.90%)  | 1,060 (24.10%)  |
| 2006         | 3,450 (77.62%)  | 995 (22.38%)    |
| 2007         | 3,272 (77.81%)  | 933 (22.19%)    |
| 2008         | 6,525 (79.07%)  | 1,727 (20.93%)  |
| 2009         | 6,123 (79.22%)  | 1,606 (20.78%)  |
| 2010         | 6,718 (80.59%)  | 1,618 (19.41%)  |
| 2011         | 6,760 (82.56%)  | 1,428 (17.44%)  |
| 2012         | 6,893 (82.68%)  | 1,444 (17.32%)  |
| 2013         | 6,770 (83.10%)  | 1,377 (16.90%)  |
| 2014         | 6,845 (83.74%)  | 1,329 (16.26%)  |
| 2015         | 6,978 (84.21%)  | 1,308 (15.79%)  |
| 2016         | 7,086 (88.13%)  | 954 (11.87%)    |
| 2018         | 12,836 (88.90%) | 1,603 (11.10%)  |

**Table 2.** Results from the intersectional model 7 indicating the 10 highest and 10 lowest Relative risk (RR) with 95% confidence intervals (CI) of smoking across intersectional strata in the Swedish population using the stratum of young, native, men with high education that were cohabiting as reference in the comparisons.

| Age                        | Gender      | Educational achievement | Migration status | Civil status      | RR (95% CI)      |
|----------------------------|-------------|-------------------------|------------------|-------------------|------------------|
| 65-84                      | Female      | High                    | Native           | Cohabiting        | 0.55 (0.45-0.69) |
| 65-84                      | Male        | High                    | Native           | Cohabiting        | 0.58 (0.48-0.71) |
| 65-84                      | Female      | High                    | Immigrant        | Cohabiting        | 0.61 (0.33-1.11) |
| 65-84                      | Female      | Middle                  | Native           | Cohabiting        | 0.80 (0.66-0.96) |
| 65-84                      | Female      | High                    | Native           | Living alone      | 0.83 (0.64-1.06) |
| 65-84                      | Male        | Middle                  | Native           | Cohabiting        | 0.85 (0.73-0.99) |
| 30-44                      | Female      | High                    | Native           | Cohabiting        | 0.86 (0.74-0.98) |
| 65-84                      | Male        | High                    | Immigrant        | Living alone      | 0.91 (0.38-2.21) |
| 45-64                      | Male        | High                    | Native           | Cohabiting        | 0.92 (0.8-1.07)  |
| 65-84                      | Male        | Low                     | Native           | Cohabiting        | 0.96 (0.84-1.11) |
| <b>30-44</b>               | <b>Male</b> | <b>High</b>             | <b>Native</b>    | <b>Cohabiting</b> | <b>Reference</b> |
| 30-44                      | Female      | High                    | Immigrant        | Living alone      | 2.87 (1.86-4.42) |
| 30-44                      | Female      | Low                     | Native           | Living alone      | 2.95 (2.29-3.78) |
| 45-64                      | Female      | Low                     | Native           | Living alone      | 2.99 (2.61-3.41) |
| 45-64                      | Male        | Middle                  | Immigrant        | Living alone      | 3.10 (2.26-4.26) |
| 45-64                      | Female      | Low                     | Immigrant        | Living alone      | 3.22 (2.56-4.06) |
| 30-44                      | Male        | Middle                  | Immigrant        | Living alone      | 3.33 (2.35-4.71) |
| 30-44                      | Female      | Low                     | Immigrant        | Living alone      | 3.41 (1.96-5.94) |
| 45-64                      | Male        | Low                     | Immigrant        | Living alone      | 3.61 (2.90-4.50) |
| 30-44                      | Male        | Low                     | Immigrant        | Cohabiting        | 3.66 (3.07-4.35) |
| 30-44                      | Male        | Low                     | Immigrant        | Living alone      | 4.45 (3.29-6.03) |
| AUC                        |             |                         |                  |                   | 0.65             |
| ΔAUC compared with model 6 |             |                         |                  |                   | 0                |

**Table 3.** Relative risks (RR) and 95%-confidence intervals (CI), of smoking among people aged 30-84 included in the National Health Surveys between 2004 and 2018 in relation to survey year, age, gender, education, migration- and civil status. Model 6 includes the same variables as model 5 but as a multicategorical variable, The RRs for model 7 are presented in the table 3. AUC-values with 95%CI representing the discriminatory accuracy and  $\Delta$ AUC-values of the models are also presented.

|                  | Model 1              | Model 2             | Model 3             | Model 4             | Model 5             | Model 6             |
|------------------|----------------------|---------------------|---------------------|---------------------|---------------------|---------------------|
| <b>Year</b>      |                      |                     |                     |                     |                     |                     |
| 2004             | 2.25<br>(2.11-2.40)  | 2.07<br>(1.95-2.21) | 2.08<br>(1.95-2.21) | 1.85<br>(1.74-1.98) | 1.88<br>(1.76-2.00) | 1.84<br>(1.73-1.97) |
| 2005             | 2.17<br>(2.01-2.35)  | 2.01<br>(1.86-2.17) | 2.01<br>(1.86-2.17) | 1.83<br>(1.69-1.98) | 1.85<br>(1.71-2.00) | 1.83<br>(1.69-1.98) |
| 2006             | 2.02<br>(1.86-2.18)  | 1.87<br>(1.72-2.02) | 1.87<br>(1.72-2.02) | 1.70<br>(1.57-1.84) | 1.71<br>(1.58-1.85) | 1.68<br>(1.55-1.82) |
| 2007             | 2.00<br>(1.84-2.17)  | 1.86<br>(1.71-2.01) | 1.86<br>(1.71-2.01) | 1.71<br>(1.57-1.85) | 1.65<br>(1.54-1.77) | 1.70<br>(1.56-1.84) |
| 2008             | 1.89<br>(1.76-2.02)  | 1.76<br>(1.64-1.88) | 1.76<br>(1.64-1.88) | 1.64<br>(1.53-1.75) | 1.66<br>(1.55-1.78) | 1.63<br>(1.52-1.74) |
| 2009             | 1.87<br>(1.75-2.01)  | 1.75<br>(1.64-1.89) | 1.76<br>(1.64-1.88) | 1.65<br>(1.54-1.77) | 1.62<br>(1.51-1.73) | 1.63<br>(1.52-1.75) |
| 2010             | 1.75<br>(1.63-1.87)  | 1.70<br>(1.58-1.82) | 1.70<br>(1.58-1.82) | 1.61<br>(1.50-1.72) | 1.46<br>(1.36-1.57) | 1.59<br>(1.48-1.70) |
| 2011             | 1.57<br>(1.46-1.69)  | 1.53<br>(1.43-1.64) | 1.53<br>(1.43-1.64) | 1.45<br>(1.35-1.56) | 1.47<br>(1.37-1.58) | 1.43<br>(1.33-1.54) |
| 2012             | 1.56<br>(1.45-1.68)  | 1.53<br>(1.42-1.64) | 1.53<br>(1.42-1.64) | 1.47<br>(1.37-1.57) | 1.45<br>(1.35-1.56) | 1.44<br>(1.34-1.55) |
| 2013             | 1.52<br>(1.42-1.64)  | 1.49<br>(1.39-1.60) | 1.49<br>(1.39-1.60) | 1.45<br>(1.35-1.55) | 1.45<br>(1.35-1.56) | 1.42<br>(1.32-1.52) |
| 2014             | 1.47 (1.36-<br>1.75) | 1.45<br>(1.35-1.56) | 1.45<br>(1.35-1.56) | 1.41<br>(1.31-1.52) | 1.42<br>(1.32-1.53) | 1.39<br>(1.30-1.50) |
| 2015             | 1.42<br>(1.32-1.53)  | 1.40<br>(1.30-1.51) | 1.40<br>(1.30-1.51) | 1.37<br>(1.27-1.47) | 1.38<br>(1.28-1.48) | 1.35<br>(1.26-1.46) |
| 2016             | 1.07<br>(0.99-1.16)  | 1.06<br>(0.97-1.14) | 1.06<br>(0.97-1.14) | 1.04<br>(0.96-1.13) | 1.05<br>(0.97-1.13) | 1.03<br>(0.95-1.11) |
| 2018             | Reference            | Reference           | Reference           | Reference           | Reference           | Reference           |
| <b>Age</b>       |                      |                     |                     |                     |                     |                     |
| 30-44            |                      | Reference           | Reference           | Reference           | Reference           | Reference           |
| 45-64            |                      | 1.06<br>(1.03-1.10) | 1.06<br>(1.03-1.10) | 0.94<br>(0.91-0.97) | 0.95<br>(0.91-0.98) | 0.93<br>(0.90-0.96) |
| 65-84            |                      | 0.68<br>(0.65-0.71) | 0.68<br>(0.65-0.71) | 0.56<br>(0.54-0.58) | 0.57<br>(0.55-0.59) | 0.53<br>(0.51-0.56) |
| <b>Gender</b>    |                      |                     |                     |                     |                     |                     |
| Male             |                      |                     | Reference           | Reference           | Reference           | Reference           |
| Female           |                      |                     | 1.00<br>(0.97-1.02) | 1.02<br>(0.99-1.05) | 1.02<br>(0.99-1.05) | 1.01<br>(0.98-1.04) |
| <b>Education</b> |                      |                     |                     |                     |                     |                     |
| Low              |                      |                     |                     | 1.96<br>(1.88-2.04) | 1.96<br>(1.88-2.04) | 1.93<br>(1.86-2.01) |
| Middle           |                      |                     |                     | 1.42<br>(1.36-1.48) | 1.43<br>(1.37-1.49) | 1.42<br>(1.36-1.49) |
| High             |                      |                     |                     | Reference           | Reference           | Reference           |

1  
2  
3  
4  
5  
6  
7  
8  
9  
10  
11  
12  
13  
14  
15  
16  
17  
18  
19  
20  
21  
22  
23  
24  
25  
26  
27  
28  
29  
30  
31  
32  
33  
34  
35  
36  
37  
38  
39  
40  
41  
42  
43  
44  
45  
46  
47  
48  
49  
50  
51  
52  
53  
54  
55  
56  
57  
58  
59  
60

|                |              |             |             |             |             |             |
|----------------|--------------|-------------|-------------|-------------|-------------|-------------|
| Born in Sweden | Native       |             |             |             | Reference   | Reference   |
|                | Immigrant    |             |             |             | 1.39        | 1.39        |
|                |              |             |             |             | (1.34-1.45) | (1.24-1.44) |
| Living alone   | Living alone |             |             |             |             | 1.53        |
|                | cohabiting   |             |             |             |             | (1.48-1.58) |
|                |              |             |             |             |             | Reference   |
| AUC            |              | 0.58        | 0.60        | 0.60        | 0.64        | 0.65        |
|                |              | (0.58-0.59) | (0.60-0.61) | (0.60-0.61) | (0.63-0.64) | (0.64-0.65) |
| ΔAUC           |              | -           | 0.02        | 0.00        | 0.04        | 0.01        |

For peer review only

## Legend to the figures

**Figure 1.** Flow chart showing the selection of the study population.

**Figure 2.** Absolute risk (i.e., prevalence) and 99% confidence intervals of smoking in different intersectional strata according the National Health Survey in Sweden between 2004 and 2018.

For peer review only

1  
2  
3  
4  
5  
6  
7  
8  
9  
10  
11  
12  
13  
14  
15  
16  
17  
18  
19  
20  
21  
22  
23  
24  
25  
26  
27  
28  
29  
30  
31  
32  
33  
34  
35  
36  
37  
38  
39  
40  
41  
42  
43  
44  
45  
46  
47  
48  
49  
50  
51  
52  
53  
54  
55  
56  
57  
58  
59  
60

For peer review only

**Figure 1.** Flow chart showing the selection of the study population.

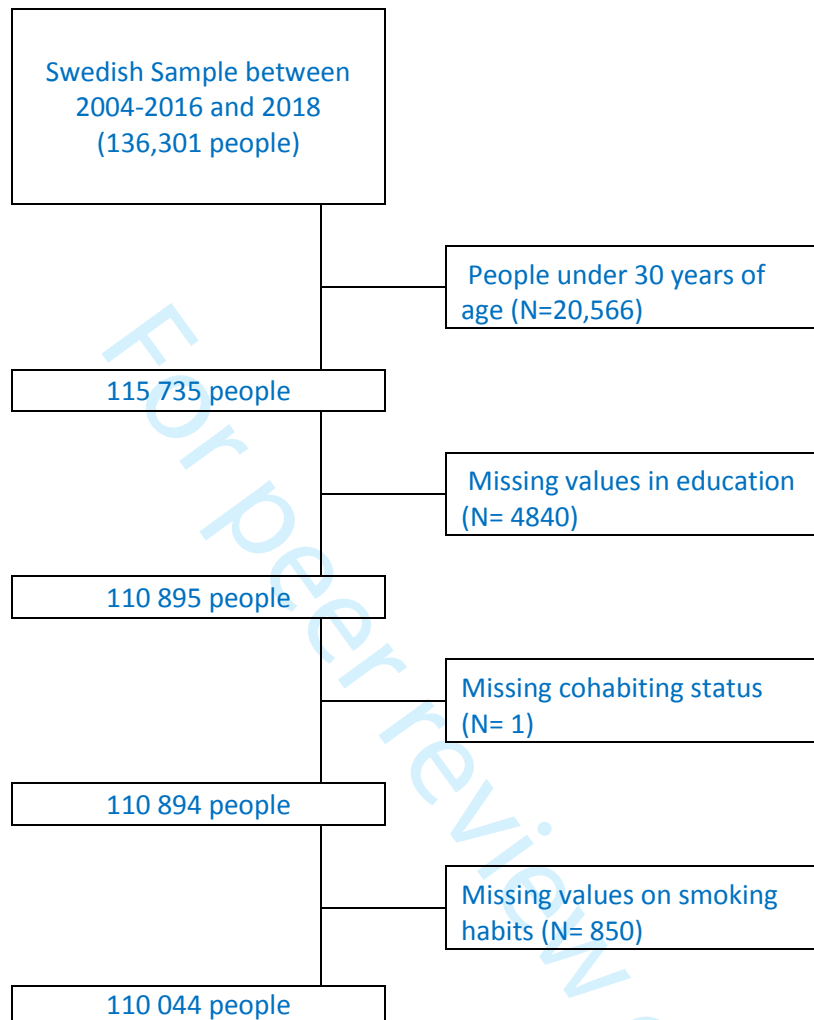

**Figure 2.** Absolute risk (i.e., prevalence) and 99% confidence intervals of smoking in different intersectional strata according the National Health Survey in Sweden between 2004 and 2018.

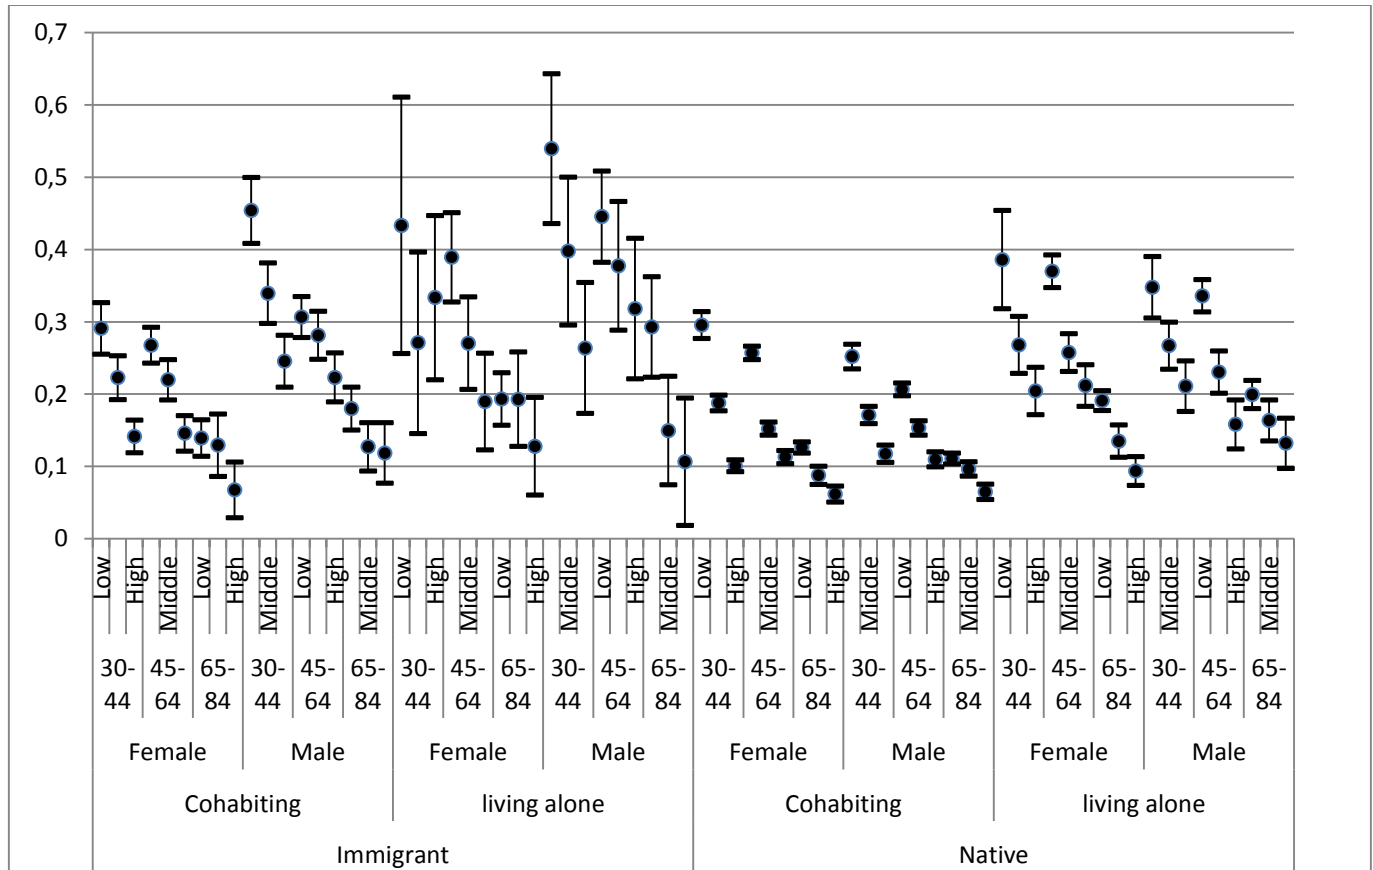



## Supplementary material 1

## S1

Trends in smoking prevalence in the National Health Surveys for Sweden. Categories of age, gender, educational achievement, migration status and civil status are shown with different lines in the respective graphs.

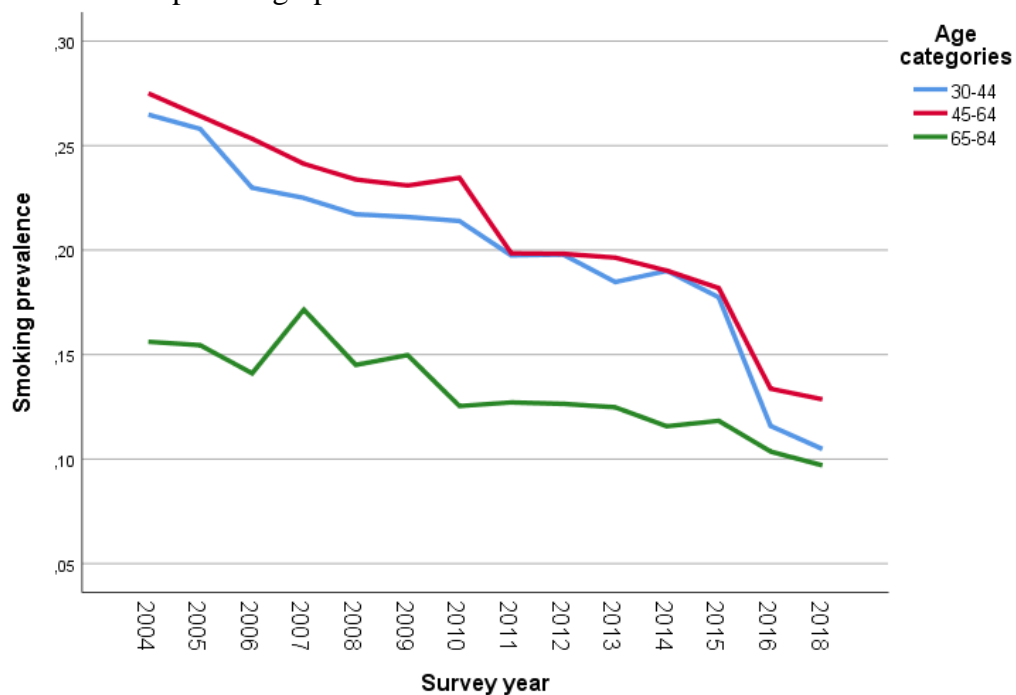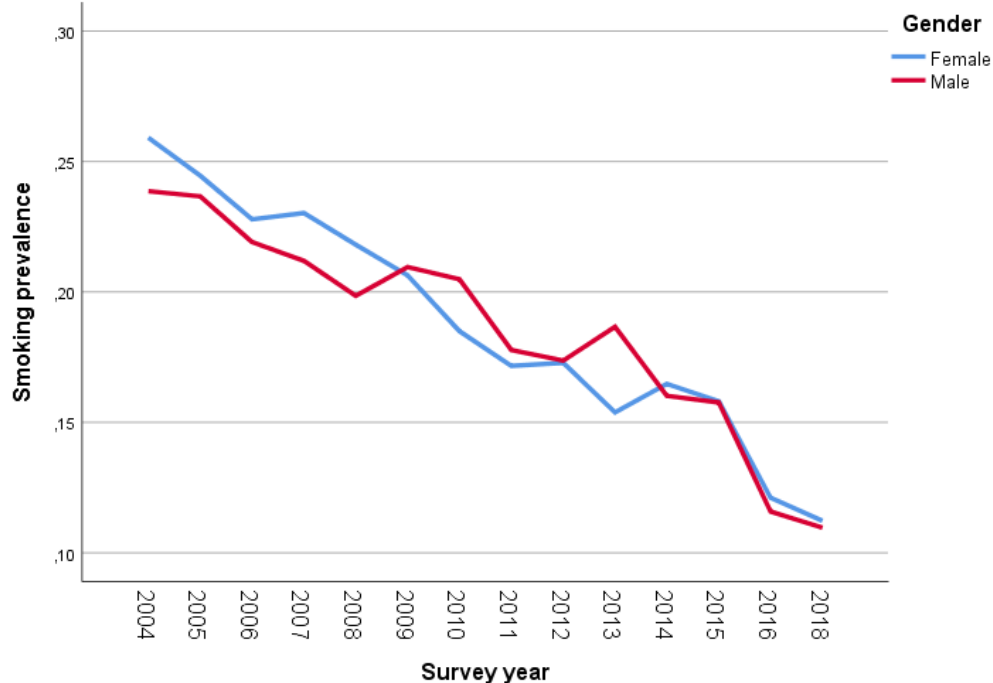

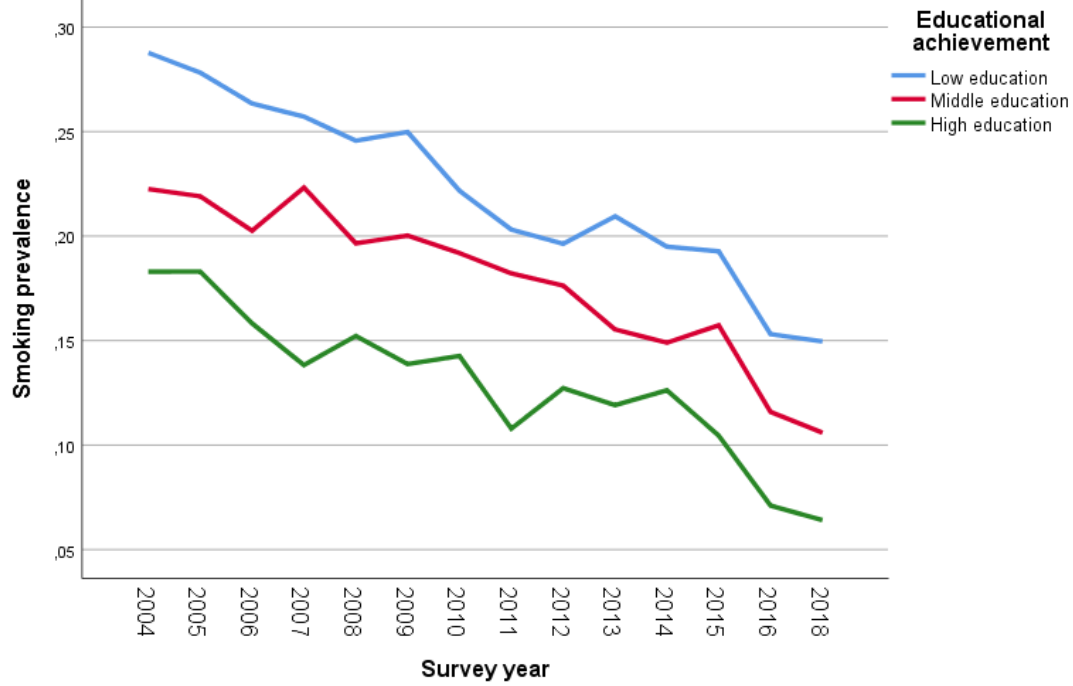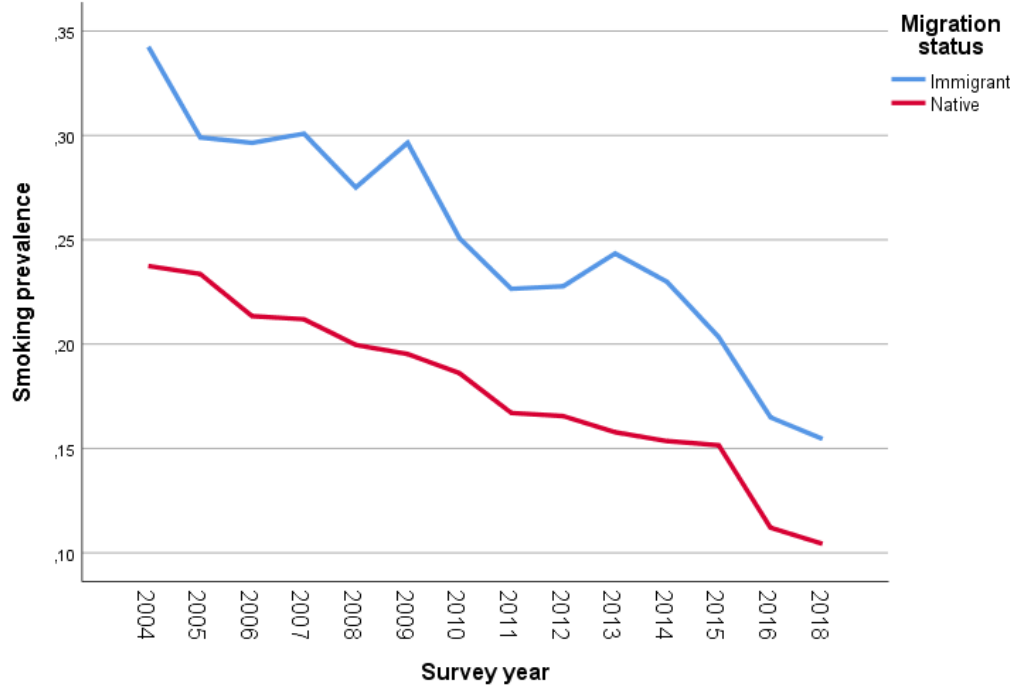

1  
2  
3  
4  
5  
6  
7  
8  
9  
10  
11  
12  
13  
14  
15  
16  
17  
18  
19  
20  
21  
22  
23  
24  
25  
26  
27  
28  
29  
30  
31  
32  
33  
34  
35  
36  
37  
38  
39  
40  
41  
42  
43  
44  
45  
46  
47  
48  
49  
50  
51  
52  
53  
54  
55  
56  
57  
58  
59  
60

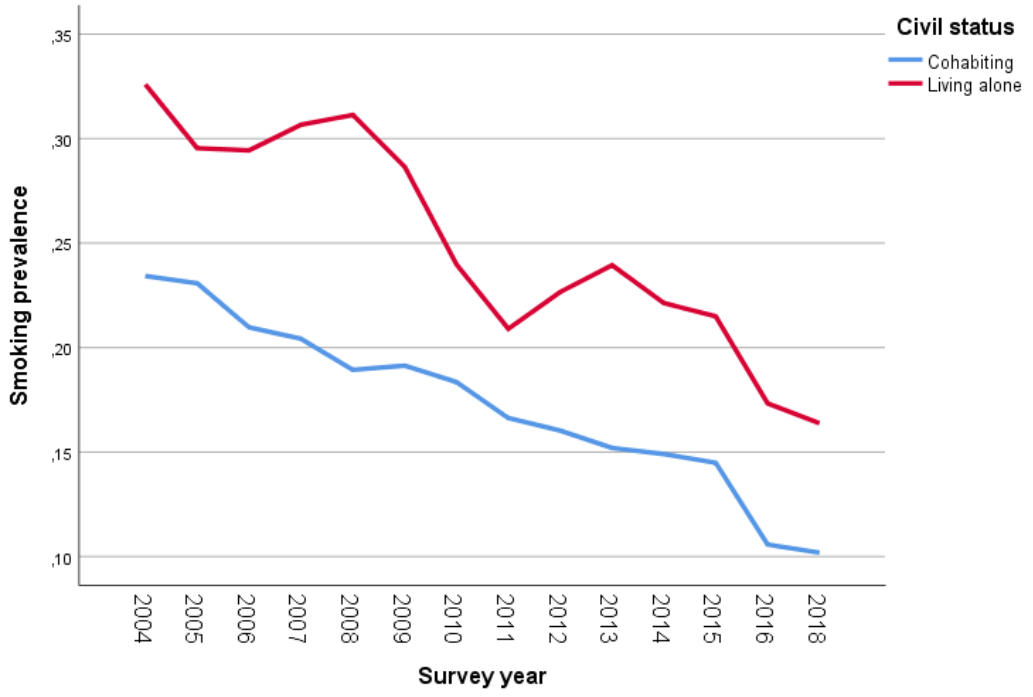

Peer review only

1  
2  
3  
4  
5  
6  
7  
8  
9  
10  
11  
12  
13  
14  
15  
16  
17  
18  
19  
20  
21  
22  
23  
24  
25  
26  
27  
28  
29  
30  
31  
32  
33  
34  
35  
36  
37  
38  
39  
40  
41  
42  
43  
44  
45  
46  
47  
48  
49  
50  
51  
52  
53  
54  
55  
56  
57  
58  
59  
60

For peer review only

## Supplementary material 2

## S2

**Table 2, full version.** Results from the intersectional model 7 indicating the 10 highest and 10 lowest Relative risk (RR) with 95% confidence intervals (CI) of smoking across intersectional strata in the Swedish population using the stratum of young, native, men with high education that were cohabiting as reference in the comparisons. The area under the receiver operator characteristic curve (AUC) values with 95%CI and the increment in the AUC ( $\Delta$ AUC) values in successive models are also presented.

| Age   | Gender | Educational achievement | Migration status | Civil status | RR (95% CI)      |
|-------|--------|-------------------------|------------------|--------------|------------------|
| 30-44 | Female | Low                     | Immigrant        | Cohabiting   | 2.35 (1.96-2.82) |
| 30-44 | Female | Low                     | Immigrant        | Living alone | 3.41 (1.96-5.94) |
| 30-44 | Female | Low                     | Native           | Cohabiting   | 2.24 (1.96-2.56) |
| 30-44 | Female | Low                     | Native           | Living alone | 2.95 (2.29-3.78) |
| 30-44 | Female | Middle                  | Immigrant        | Cohabiting   | 1.83 (1.51-2.21) |
| 30-44 | Female | Middle                  | Immigrant        | Living alone | 2.33 (1.34-4.05) |
| 30-44 | Female | Middle                  | Native           | Cohabiting   | 1.53 (1.35-1.73) |
| 30-44 | Female | Middle                  | Native           | Living alone | 2.2 (1.8-2.7)    |
| 30-44 | Female | High                    | Immigrant        | Cohabiting   | 1.22 (0.99-1.49) |
| 30-44 | Female | High                    | Immigrant        | Living alone | 2.87 (1.86-4.42) |
| 30-44 | Female | High                    | Native           | Cohabiting   | 0.86 (0.74-0.98) |
| 30-44 | Female | High                    | Native           | Living alone | 1.72 (1.39-2.12) |
| 30-44 | Male   | Low                     | Immigrant        | Cohabiting   | 3.66 (3.07-4.35) |
| 30-44 | Male   | Low                     | Immigrant        | Living alone | 4.45 (3.29-6.03) |
| 30-44 | Male   | Low                     | Native           | Cohabiting   | 1.92 (1.68-2.2)  |
| 30-44 | Male   | Low                     | Native           | Living alone | 2.67 (2.21-3.21) |
| 30-44 | Male   | Middle                  | Immigrant        | Cohabiting   | 2.84 (2.36-3.43) |
| 30-44 | Male   | Middle                  | Immigrant        | Living alone | 3.33 (2.35-4.71) |
| 30-44 | Male   | Middle                  | Native           | Cohabiting   | 1.43 (1.25-1.63) |
| 30-44 | Male   | Middle                  | Native           | Living alone | 2.21 (1.85-2.64) |
| 30-44 | Male   | High                    | Immigrant        | Cohabiting   | 2.13 (1.74-2.6)  |
| 30-44 | Male   | High                    | Immigrant        | Living alone | 2.32 (1.53-3.5)  |

|    |       |        |        |           |              |                  |
|----|-------|--------|--------|-----------|--------------|------------------|
| 1  |       |        |        |           |              |                  |
| 2  |       |        |        |           |              |                  |
| 3  | 30-44 | Male   | High   | Native    | Cohabiting   | Reference        |
| 4  |       |        |        |           |              |                  |
| 5  | 30-44 | Male   | High   | Native    | Living alone | 1.75 (1.41-2.18) |
| 6  |       |        |        |           |              |                  |
| 7  | 45-64 | Female | Low    | Immigrant | Cohabiting   | 2.19 (1.88-2.55) |
| 8  |       |        |        |           |              |                  |
| 9  | 45-64 | Female | Low    | Immigrant | Living alone | 3.22 (2.56-4.06) |
| 10 |       |        |        |           |              |                  |
| 11 | 45-64 | Female | Low    | Native    | Cohabiting   | 2.08 (1.85-2.34) |
| 12 |       |        |        |           |              |                  |
| 13 | 45-64 | Female | Low    | Native    | Living alone | 2.99 (2.61-3.41) |
| 14 |       |        |        |           |              |                  |
| 15 | 45-64 | Female | Middle | Immigrant | Cohabiting   | 1.87 (1.56-2.23) |
| 16 |       |        |        |           |              |                  |
| 17 | 45-64 | Female | Middle | Immigrant | Living alone | 2.23 (1.66-3.01) |
| 18 |       |        |        |           |              |                  |
| 19 | 45-64 | Female | Middle | Native    | Cohabiting   | 1.29 (1.14-1.46) |
| 20 |       |        |        |           |              |                  |
| 21 | 45-64 | Female | Middle | Native    | Living alone | 2.16 (1.84-2.53) |
| 22 |       |        |        |           |              |                  |
| 23 | 45-64 | Female | High   | Immigrant | Cohabiting   | 1.27 (1.03-1.57) |
| 24 |       |        |        |           |              |                  |
| 25 | 45-64 | Female | High   | Immigrant | Living alone | 1.63 (1.08-2.45) |
| 26 |       |        |        |           |              |                  |
| 27 | 45-64 | Female | High   | Native    | Cohabiting   | 0.97 (0.84-1.11) |
| 28 |       |        |        |           |              |                  |
| 29 | 45-64 | Female | High   | Native    | Living alone | 1.76 (1.46-2.13) |
| 30 |       |        |        |           |              |                  |
| 31 | 45-64 | Male   | Low    | Immigrant | Cohabiting   | 2.55 (2.18-2.98) |
| 32 |       |        |        |           |              |                  |
| 33 | 45-64 | Male   | Low    | Immigrant | Living alone | 3.61 (2.9-4.5)   |
| 34 |       |        |        |           |              |                  |
| 35 | 45-64 | Male   | Low    | Native    | Cohabiting   | 1.71 (1.52-1.93) |
| 36 |       |        |        |           |              |                  |
| 37 | 45-64 | Male   | Low    | Native    | Living alone | 2.77 (2.42-3.17) |
| 38 |       |        |        |           |              |                  |
| 39 | 45-64 | Male   | Middle | Immigrant | Cohabiting   | 2.39 (2.01-2.86) |
| 40 |       |        |        |           |              |                  |
| 41 | 45-64 | Male   | Middle | Immigrant | Living alone | 3.1 (2.26-4.26)  |
| 42 |       |        |        |           |              |                  |
| 43 | 45-64 | Male   | Middle | Native    | Cohabiting   | 1.28 (1.12-1.45) |
| 44 |       |        |        |           |              |                  |
| 45 | 45-64 | Male   | Middle | Native    | Living alone | 1.92 (1.61-2.31) |
| 46 |       |        |        |           |              |                  |
| 47 | 45-64 | Male   | High   | Immigrant | Cohabiting   | 1.91 (1.56-2.35) |
| 48 |       |        |        |           |              |                  |
| 49 | 45-64 | Male   | High   | Immigrant | Living alone | 2.7 (1.84-3.98)  |
| 50 |       |        |        |           |              |                  |
| 51 | 45-64 | Male   | High   | Native    | Cohabiting   | 0.92 (0.8-1.07)  |
| 52 |       |        |        |           |              |                  |
| 53 | 45-64 | Male   | High   | Native    | Living alone | 1.35 (1.04-1.75) |
| 54 |       |        |        |           |              |                  |
| 55 | 65-84 | Female | Low    | Immigrant | Cohabiting   | 1.23 (0.98-1.54) |
| 56 |       |        |        |           |              |                  |
| 57 | 65-84 | Female | Low    | Immigrant | Living alone | 1.62 (1.28-2.05) |
| 58 |       |        |        |           |              |                  |
| 59 | 65-84 | Female | Low    | Native    | Cohabiting   | 1.1 (0.97-1.25)  |
| 60 |       |        |        |           |              |                  |

|    |       |        |        |           |              |                  |
|----|-------|--------|--------|-----------|--------------|------------------|
| 1  |       |        |        |           |              |                  |
| 2  |       |        |        |           |              |                  |
| 3  | 65-84 | Female | Low    | Native    | Living alone | 1.62 (1.42-1.86) |
| 4  |       |        |        |           |              |                  |
| 5  | 65-84 | Female | Middle | Immigrant | Cohabiting   | 1.18 (0.81-1.71) |
| 6  |       |        |        |           |              |                  |
| 7  | 65-84 | Female | Middle | Immigrant | Living alone | 1.66 (1.12-2.46) |
| 8  |       |        |        |           |              |                  |
| 9  | 65-84 | Female | Middle | Native    | Cohabiting   | 0.8 (0.66-0.96)  |
| 10 |       |        |        |           |              |                  |
| 11 | 65-84 | Female | Middle | Native    | Living alone | 1.2 (0.97-1.48)  |
| 12 |       |        |        |           |              |                  |
| 13 | 65-84 | Female | High   | Immigrant | Cohabiting   | 0.61 (0.33-1.11) |
| 14 |       |        |        |           |              |                  |
| 15 | 65-84 | Female | High   | Immigrant | Living alone | 1.16 (0.65-2.07) |
| 16 |       |        |        |           |              |                  |
| 17 | 65-84 | Female | High   | Native    | Cohabiting   | 0.55 (0.45-0.69) |
| 18 |       |        |        |           |              |                  |
| 19 | 65-84 | Female | High   | Native    | Living alone | 0.83 (0.64-1.06) |
| 20 |       |        |        |           |              |                  |
| 21 | 65-84 | Male   | Low    | Immigrant | Cohabiting   | 1.57 (1.27-1.95) |
| 22 |       |        |        |           |              |                  |
| 23 | 65-84 | Male   | Low    | Immigrant | Living alone | 2.49 (1.84-3.37) |
| 24 |       |        |        |           |              |                  |
| 25 | 65-84 | Male   | Low    | Native    | Cohabiting   | 0.96 (0.84-1.1)  |
| 26 |       |        |        |           |              |                  |
| 27 | 65-84 | Male   | Low    | Native    | Living alone | 1.71 (1.47-2)    |
| 28 |       |        |        |           |              |                  |
| 29 | 65-84 | Male   | Middle | Immigrant | Cohabiting   | 1.12 (0.82-1.51) |
| 30 |       |        |        |           |              |                  |
| 31 | 65-84 | Male   | Middle | Immigrant | Living alone | 1.29 (0.74-2.24) |
| 32 |       |        |        |           |              |                  |
| 33 | 65-84 | Male   | Middle | Native    | Cohabiting   | 0.85 (0.73-0.99) |
| 34 |       |        |        |           |              |                  |
| 35 | 65-84 | Male   | Middle | Native    | Living alone | 1.47 (1.18-1.83) |
| 36 |       |        |        |           |              |                  |
| 37 | 65-84 | Male   | High   | Immigrant | Cohabiting   | 1.06 (0.72-1.57) |
| 38 |       |        |        |           |              |                  |
| 39 | 65-84 | Male   | High   | Immigrant | Living alone | 0.91 (0.38-2.21) |
| 40 |       |        |        |           |              |                  |
| 41 | 65-84 | Male   | High   | Native    | Cohabiting   | 0.58 (0.48-0.71) |
| 42 |       |        |        |           |              |                  |
| 43 | 65-84 | Male   | High   | Native    | Living alone | 1.19 (0.88-1.6)  |
| 44 |       |        |        |           |              |                  |
| 45 |       |        |        |           |              |                  |
| 46 |       |        |        |           |              |                  |
| 47 |       |        |        |           |              |                  |
| 48 |       |        |        |           |              |                  |
| 49 |       |        |        |           |              |                  |
| 50 |       |        |        |           |              |                  |
| 51 |       |        |        |           |              |                  |
| 52 |       |        |        |           |              |                  |
| 53 |       |        |        |           |              |                  |
| 54 |       |        |        |           |              |                  |
| 55 |       |        |        |           |              |                  |
| 56 |       |        |        |           |              |                  |
| 57 |       |        |        |           |              |                  |
| 58 |       |        |        |           |              |                  |
| 59 |       |        |        |           |              |                  |
| 60 |       |        |        |           |              |                  |

1  
2  
3  
4  
5  
6  
7  
8  
9  
10  
11  
12  
13  
14  
15  
16  
17  
18  
19  
20  
21  
22  
23  
24  
25  
26  
27  
28  
29  
30  
31  
32  
33  
34  
35  
36  
37  
38  
39  
40  
41  
42  
43  
44  
45  
46  
47  
48  
49  
50  
51  
52  
53  
54  
55  
56  
57  
58  
59  
60

For peer review only



STROBE Statement for manuscript entitled “Understanding the Complexity of Socioeconomic Disparities in smoking prevalence: Combining Intersectionality theory with analysis of individual heterogeneity and discriminatory accuracy (AIHDA)”

|                           | Item No | Recommendation                                                                                                                                                                                    |   |
|---------------------------|---------|---------------------------------------------------------------------------------------------------------------------------------------------------------------------------------------------------|---|
| <b>Title and abstract</b> | 1       | (a) Indicate the study’s design with a commonly used term in the title or the abstract                                                                                                            | ✓ |
|                           |         | (b) Provide in the abstract an informative and balanced summary of what was done and what was found                                                                                               | ✓ |
| <b>Introduction</b>       |         |                                                                                                                                                                                                   |   |
| Background/rationale      | 2       | Explain the scientific background and rationale for the investigation being reported                                                                                                              | ✓ |
| Objectives                | 3       | State specific objectives, including any prespecified hypotheses                                                                                                                                  | ✓ |
| <b>Methods</b>            |         |                                                                                                                                                                                                   |   |
| Study design              | 4       | Present key elements of study design early in the paper                                                                                                                                           | ✓ |
| Setting                   | 5       | Describe the setting, locations, and relevant dates, including periods of recruitment, exposure, follow-up, and data collection                                                                   | ✓ |
| Participants              | 6       | (a) Give the eligibility criteria, and the sources and methods of selection of participants                                                                                                       | ✓ |
| Variables                 | 7       | Clearly define all outcomes, exposures, predictors, potential confounders, and effect modifiers. Give diagnostic criteria, if applicable                                                          | ✓ |
| Data sources/ measurement | 8*      | For each variable of interest, give sources of data and details of methods of assessment (measurement). Describe comparability of assessment methods if there is more than one group              | ✓ |
| Bias                      | 9       | Describe any efforts to address potential sources of bias                                                                                                                                         | ✓ |
| Study size                | 10      | Explain how the study size was arrived at                                                                                                                                                         | ✓ |
| Quantitative variables    | 11      | Explain how quantitative variables were handled in the analyses. If applicable, describe which groupings were chosen and why                                                                      | ✓ |
| Statistical methods       | 12      | (a) Describe all statistical methods, including those used to control for confounding                                                                                                             | ✓ |
|                           |         | (b) Describe any methods used to examine subgroups and interactions                                                                                                                               | ✓ |
|                           |         | (c) Explain how missing data were addressed                                                                                                                                                       | ✓ |
|                           |         | (d) If applicable, describe analytical methods taking account of sampling strategy                                                                                                                | ✓ |
|                           |         | (e) Describe any sensitivity analyses                                                                                                                                                             | ✓ |
| <b>Results</b>            |         |                                                                                                                                                                                                   |   |
| Participants              | 13*     | (a) Report numbers of individuals at each stage of study—eg numbers potentially eligible, examined for eligibility, confirmed eligible, included in the study, completing follow-up, and analysed | ✓ |
|                           |         | (b) Give reasons for non-participation at each stage                                                                                                                                              | ✓ |
|                           |         | (c) Consider use of a flow diagram                                                                                                                                                                | ✓ |
| Descriptive data          | 14*     | (a) Give characteristics of study participants (eg demographic, clinical, social) and information on exposures and potential confounders                                                          | ✓ |
|                           |         | (b) Indicate number of participants with missing data for each variable of interest                                                                                                               | ✓ |
| Outcome data              | 15*     | Report numbers of outcome events or summary measures                                                                                                                                              | ✓ |

|    |                          |    |                                                                                                                                                                                                              |
|----|--------------------------|----|--------------------------------------------------------------------------------------------------------------------------------------------------------------------------------------------------------------|
| 1  |                          |    |                                                                                                                                                                                                              |
| 2  | Main results             | 16 | (a) Give unadjusted estimates and, if applicable, confounder-adjusted estimates and their precision (eg, 95% confidence interval). Make clear which confounders were adjusted for and why they were included |
| 3  |                          |    | ✓                                                                                                                                                                                                            |
| 4  |                          |    |                                                                                                                                                                                                              |
| 5  |                          |    |                                                                                                                                                                                                              |
| 6  |                          |    | (b) Report category boundaries when continuous variables were categorized                                                                                                                                    |
| 7  |                          |    | ✓                                                                                                                                                                                                            |
| 8  |                          |    |                                                                                                                                                                                                              |
| 9  |                          |    | (c) If relevant, consider translating estimates of relative risk into absolute risk for a meaningful time period                                                                                             |
| 10 |                          |    | ✓                                                                                                                                                                                                            |
| 11 | Other analyses           | 17 | Report other analyses done—eg analyses of subgroups and interactions, and sensitivity analyses                                                                                                               |
| 12 |                          |    | ✓                                                                                                                                                                                                            |
| 13 |                          |    |                                                                                                                                                                                                              |
| 14 | <b>Discussion</b>        |    |                                                                                                                                                                                                              |
| 15 | Key results              | 18 | Summarise key results with reference to study objectives                                                                                                                                                     |
| 16 |                          |    | ✓                                                                                                                                                                                                            |
| 17 | Limitations              | 19 | Discuss limitations of the study, taking into account sources of potential bias or imprecision. Discuss both direction and magnitude of any potential bias                                                   |
| 18 |                          |    | ✓                                                                                                                                                                                                            |
| 19 |                          |    |                                                                                                                                                                                                              |
| 20 | Interpretation           | 20 | Give a cautious overall interpretation of results considering objectives, limitations, multiplicity of analyses, results from similar studies, and other relevant evidence                                   |
| 21 |                          |    | ✓                                                                                                                                                                                                            |
| 22 |                          |    |                                                                                                                                                                                                              |
| 23 |                          |    |                                                                                                                                                                                                              |
| 24 | Generalisability         | 21 | Discuss the generalisability (external validity) of the study results                                                                                                                                        |
| 25 |                          |    | ✓                                                                                                                                                                                                            |
| 26 | <b>Other information</b> |    |                                                                                                                                                                                                              |
| 27 | Funding                  | 22 | Give the source of funding and the role of the funders for the present study and, if applicable, for the original study on which the present article is based                                                |
| 28 |                          |    | ✓                                                                                                                                                                                                            |
| 29 |                          |    |                                                                                                                                                                                                              |
| 30 |                          |    |                                                                                                                                                                                                              |

\*Give information separately for exposed and unexposed groups.

**Note:** An Explanation and Elaboration article discusses each checklist item and gives methodological background and published examples of transparent reporting. The STROBE checklist is best used in conjunction with this article (freely available on the Web sites of PLoS Medicine at <http://www.plosmedicine.org/>, Annals of Internal Medicine at <http://www.annals.org/>, and Epidemiology at <http://www.epidem.com/>). Information on the STROBE Initiative is available at [www.strobe-statement.org](http://www.strobe-statement.org).

# BMJ Open

## Understanding the complexity of socioeconomic disparities in smoking prevalence in Sweden: a cross-sectional study applying intersectionality theory

|                                 |                                                                                                                                                                                                                                                                                                                                                                                                                                                                                                                                                                                                                    |
|---------------------------------|--------------------------------------------------------------------------------------------------------------------------------------------------------------------------------------------------------------------------------------------------------------------------------------------------------------------------------------------------------------------------------------------------------------------------------------------------------------------------------------------------------------------------------------------------------------------------------------------------------------------|
| Journal:                        | <i>BMJ Open</i>                                                                                                                                                                                                                                                                                                                                                                                                                                                                                                                                                                                                    |
| Manuscript ID                   | bmjopen-2020-042323.R1                                                                                                                                                                                                                                                                                                                                                                                                                                                                                                                                                                                             |
| Article Type:                   | Original research                                                                                                                                                                                                                                                                                                                                                                                                                                                                                                                                                                                                  |
| Date Submitted by the Author:   | 19-Dec-2020                                                                                                                                                                                                                                                                                                                                                                                                                                                                                                                                                                                                        |
| Complete List of Authors:       | Axelsson Fisk, Sten; Lund University, Unit for Social Epidemiology, Department of Clinical Sciences<br>Lindstrom, Martin; Lunds University Faculty of Medicine, Unit for Social Medicine and Health Policy, Department of Clinical Sciences; Region Skåne, Centre for Primary Health Care Research<br>Perez-Vicente, Raquel; Lunds University Faculty of Medicine, Unit for Social Epidemiology, Department of Clinical Sciences<br>Merlo, Juan; Lunds University Faculty of Medicine, Unit for Social Epidemiology, Department of Clinical Sciences; Region Skåne, Malmö, Centre for Primary Health Care Research |
| <b>Primary Subject Heading</b>: | Epidemiology                                                                                                                                                                                                                                                                                                                                                                                                                                                                                                                                                                                                       |
| Secondary Subject Heading:      | Smoking and tobacco, Public health, Health policy                                                                                                                                                                                                                                                                                                                                                                                                                                                                                                                                                                  |
| Keywords:                       | SOCIAL MEDICINE, EPIDEMIOLOGY, Health policy < HEALTH SERVICES ADMINISTRATION & MANAGEMENT, PUBLIC HEALTH, STATISTICS & RESEARCH METHODS, Substance misuse < PSYCHIATRY                                                                                                                                                                                                                                                                                                                                                                                                                                            |
|                                 |                                                                                                                                                                                                                                                                                                                                                                                                                                                                                                                                                                                                                    |

SCHOLARONE™  
Manuscripts



I, the Submitting Author has the right to grant and does grant on behalf of all authors of the Work (as defined in the below author licence), an exclusive licence and/or a non-exclusive licence for contributions from authors who are: i) UK Crown employees; ii) where BMJ has agreed a CC-BY licence shall apply, and/or iii) in accordance with the terms applicable for US Federal Government officers or employees acting as part of their official duties; on a worldwide, perpetual, irrevocable, royalty-free basis to BMJ Publishing Group Ltd ("BMJ") its licensees and where the relevant Journal is co-owned by BMJ to the co-owners of the Journal, to publish the Work in this journal and any other BMJ products and to exploit all rights, as set out in our [licence](#).

The Submitting Author accepts and understands that any supply made under these terms is made by BMJ to the Submitting Author unless you are acting as an employee on behalf of your employer or a postgraduate student of an affiliated institution which is paying any applicable article publishing charge ("APC") for Open Access articles. Where the Submitting Author wishes to make the Work available on an Open Access basis (and intends to pay the relevant APC), the terms of reuse of such Open Access shall be governed by a Creative Commons licence – details of these licences and which [Creative Commons](#) licence will apply to this Work are set out in our licence referred to above.

Other than as permitted in any relevant BMJ Author's Self Archiving Policies, I confirm this Work has not been accepted for publication elsewhere, is not being considered for publication elsewhere and does not duplicate material already published. I confirm all authors consent to publication of this Work and authorise the granting of this licence.

1  
2  
3  
4 1 **Understanding the complexity of socioeconomic disparities in smoking**  
5 2 **prevalence in Sweden: a cross-sectional study applying intersectionality**  
6 3 **theory**

8 4 **Running Title:** Complex Disparities in smoking prevalence  
9 5

10 6 **Journal BMJ-Open**  
11 7

13 8 Sten Axelsson Fisk, MD<sup>1</sup>

15 9 Martin Lindström MD, PhD, Prof<sup>2,3</sup>

16 10 Raquel Perez-Vicente. MSc<sup>1</sup>

18 11 Juan Merlo, MD, PhD, Prof<sup>1,3</sup>  
19 12

20 13 <sup>1</sup> Unit for Social Epidemiology, Department of Clinical Sciences, Lund University, Malmö, Sweden

21 14 <sup>2</sup> Unit for Social Medicine and Health Policy, Department of Clinical Sciences, Lund University, Malmö,  
22 15 Sweden

23 16 <sup>3</sup> Centre for Primary Health Care Research, Region Skåne, Malmö, Sweden  
24 17  
25 18

27 19 **Corresponding author**

28 20 Sten Axelsson Fisk

29 21 Unit for Social Epidemiology, Lund University

30 22 Jan Waldenströms gata 35

31 23 214 28 Malmö

32 24 Sweden

33 25 Phone: +46-701-732506

34 26 Email: sten.axelsson\_fisk@med.lu.se  
35 27  
36 28  
37 29  
38 30  
39 31  
40 32

41 30 **Words:** 3968 (excluding abstract, article summary, abbreviations and references)

42 31 **Tables:** 3

43 32 **Figures:** 2

44 33 **Supplemental material:** 4  
45 34  
46 35  
47 36  
48 37  
49 38  
50 39  
51 40  
52 41  
53 42  
54 43  
55 44  
56 45  
57 46  
58 47  
59 48  
60 49

## 1 **Abstract (254 words)**

2 **Objectives:** Socioeconomic disparities in smoking prevalence remains a challenge to public  
3 health. The objective of this study was to present a simple methodology that displays  
4 intersectional patterns of smoking and quantify heterogeneities within groups to avoid  
5 inappropriate and potentially stigmatizing conclusions exclusively based on group averages.

6 **Setting:** This is a cross-sectional observational study based on data from the National Health  
7 Surveys for Sweden (2004-2016 and 2018) including 136 301 individuals. We excluded  
8 people under 30 years of age, or missing information on education, household composition or  
9 smoking habits. The final sample consisted on 110 044 individuals or 80.7% of the original  
10 sample.

11 **Outcome:** Applying intersectional analysis of individual heterogeneity and discriminatory  
12 accuracy (AIHDA), we investigated the risk of self-reported smoking across 72 intersectional  
13 strata defined by age, gender, educational achievement, migration status and household  
14 composition.

15 **Results:** The distribution of smoking habit risk in the population was very heterogeneous. For  
16 instance, immigrant men aged 30–44 with low educational achievement that lived alone had a  
17 prevalence of smoking of 54% (95%CI 44–64%), around 9 times higher than native women  
18 aged 65–84 with high educational achievement and living with other(s) that had a prevalence  
19 of 6% (95%CI 5–7%). The discriminatory accuracy of the information was moderate.

20 **Conclusion:** A more detailed, intersectional mapping of the socioeconomic and demographic  
21 disparities of smoking can assist in public health management aiming to eliminate this  
22 unhealthy habit from the community. Intersectionality theory together with AIHDA provides  
23 information that can guide resource allocation according to the concept proportionate  
24 universalism.

## 1 **Strengths and limitations**

- 2 • We present an intersectional approach to study the multidimensional socioeconomic  
3 disparities in smoking prevalence in Sweden.
- 4 • In addition to differences between averages of intersectional strata, we quantify  
5 individual heterogeneities around those averages by presenting measurements of  
6 discriminatory accuracy.
- 7 • Our method is simpler but share crucial advantages with Multilevel AIHDA, such as  
8 improved health mapping and assessment of intersectional interaction.
- 9 • We use pooled data from Swedish National Health Survey with participation rates  
10 spanning from 60.8% 2004 to 42.1% 2018.
- 11 • Analysis of Individual Heterogeneity and Discriminatory Accuracy (AIHDA) is a  
12 suitable tool to inform whether interventions to reduce socioeconomic health  
13 disparities should be universal or target specific groups.

1  
2  
3  
4  
5  
6  
7  
8  
9  
10  
11  
12  
13  
14  
15  
16  
17  
18  
19  
20  
21  
22  
23  
24  
25  
26  
27  
28  
29  
30  
31  
32  
33  
34  
35  
36  
37  
38  
39  
40  
41  
42  
43  
44  
45  
46  
47  
48  
49  
50  
51  
52  
53  
54  
55  
56  
57  
58  
59  
60

1 **Abbreviations**

2 AIHDA=Analysis of Individual Heterogeneity and Discriminatory Accuracy, AUC=Area

3 Under receiving operator characteristics Curve, CI=Confidence Interval, DA=Discriminatory

4 Accuracy, OR=Odds Ratio, PR=Prevalence Ratio, SDH=Social Determinants of Health

5

6

For peer review only



## 1 Introduction

2 A higher prevalence of smoking among individuals with low socioeconomic position (SEP)  
3 compared to higher SEP has been reported in several studies in Sweden [1] and globally [2-  
4 5]. The higher prevalence results both from higher rates of initiation [6] and lower rates of  
5 successful smoking cessation [7]. In addition to this, other factors like country of birth [8],  
6 household composition [9], age and gender influence the probability of smoking [10].

7 Overall, socioeconomic determinants of smoking are multidimensional but few studies have  
8 empirically confronted this heterogeneity using an intersectional perspective [11-15].

## 9 Intersectionality theory, proportionate universalism, and the analysis of individual 10 heterogeneity and discriminatory accuracy (AIHDA)

11 Structural interventions including raised tobacco taxes and smoking free zones can reduce  
12 smoking prevalence [16], most among people with low SEP [17]. In UK, health-care based  
13 smoking cessation aid has reduced disparities in smoking rates between privileged and  
14 socioeconomically deprived areas, although this effect was modest [18]. However, a review  
15 of the efficacy of non-health care interventions targeting behavioural factors among people  
16 with low education [19] concludes that there is a lack of evidence that such interventions  
17 oriented towards individual determinants of health are efficient when it comes to reducing  
18 socioeconomic disparities in smoking [20]. Marmot and Bell claim [21] that interventions to  
19 reduce socioeconomic health disparities need to address all levels of society and not only  
20 those who are worst off. They argue that an efficient approach may be *proportionate*  
21 *universalism* [21, 22] where interventions are universal, i.e. directed towards the whole  
22 population (such as tobacco taxes, smoking bans in public) but proportionately more intense  
23 among population subgroups with augmented needs where targeted interventions can be  
24 launched (i.e. information campaigns in specific neighbourhoods or populations such as  
25 pregnant women). However, as argued elsewhere [22-24] successful and efficient

1 implementation of *proportionate universalism* requires development and application of  
2 appropriate theories and epidemiologic methodologies.

3 Intersectionality theory is a critical social theory [25] that stresses the need for simultaneous  
4 consideration of different social dimensions such as racialized identity, gender and class in  
5 order to properly understand the social context acting on individuals. According to  
6 intersectionality theory, the social reality is shaped by overlapping systems of oppression that  
7 influence distribution of resources and power in society.

8 The inclusion of intersectionality in epidemiology and public health has been promoted by  
9 several scholars [26-29]. A direct consequence of this approach in quantitative analyses is the  
10 study of multiple intersectional strata defined by combinations of different social dimensions,  
11 since the effect of each social dimension on an individual is intrinsically dependent on other  
12 social identities of that person. This contrasts with the common approach considering one  
13 social dimension at the time. Thereby, the intersectional approach may enrich public health  
14 research by providing an improved mapping of socioeconomic health disparities [26, 30].  
15 Such socioeconomic heterogeneity can be analyzed by quantifying differences between  
16 intersectional strata averages. However, we [23, 28, 29, 31, 32] and other scholars [33-35]  
17 stress the added relevance of simultaneously quantifying the discriminatory accuracy (DA) of  
18 the intersectional categorization for specific outcomes. An intersectional map combined with  
19 information on its DA provides an improved picture of the socioeconomic heterogeneity  
20 existing in the society. This approach can be used to inform interventions according to the  
21 concept of proportionate universalism. The extent to which a universal intervention needs to  
22 be proportional can be evaluated by the DA of the intersectional strata. A low DA suggests  
23 the need for universal interventions while a high DA supports more selective interventions.  
24 This idea aligns with the distinctions made by McCall between anti-, and inter-categorical

1 intersectional approaches [36]. According to the anti-categorical intersectionality, the  
2 categorizations adopted in quantitative research are simplified and contribute to stereotypes  
3 and perpetuations of inequalities. The inter-categorical intersectionality, on the other hand,  
4 accepts categorizations since they can be useful in the study of intersectional inequities. The  
5 finding of a low DA would support the anti-categorical standpoint that the categorizations  
6 lack relevance for the studied outcome. If the DA is high, this would rather support the inter-  
7 categorical standpoint that intersectional matrix provides worthy information. A moderate  
8 DA does not give full support to neither the anti- nor inter-categorical intersectionality.

9 Adopting a quantitative perspective, in the present study we aim to illustrate how a more  
10 precise intersectional categorization combined with AIHDA improves our understanding of  
11 smoking prevalence and facilitates the application of proportionate universalism.

## 12 **Methods**

### 13 **Study population**

14 In this cross-sectional observational study, we used data from all the 14 National Health  
15 Surveys (NHS) for Sweden for the years 2004–2016 and 2018  
16 ([https://www.folkhalsomyndigheten.se/the-public-health-agency-of-sweden/public-health-  
17 reporting/](https://www.folkhalsomyndigheten.se/the-public-health-agency-of-sweden/public-health-reporting/)). The NHS is an ongoing collaborative project between the Public Health Agency  
18 of Sweden and the Swedish Association of Local Authorities and Regions. The NHS record  
19 self-reported information on health, lifestyle and living conditions. The study has been  
20 conducted annually between 2004 and 2016 and comprised a random sample of 20,000  
21 individuals aged 16–84 years. After 2016 the survey is conducted biannually but with a  
22 random sample of 40,000 individuals. Response rates span from 60.8% 2004 to 42.1% 2018.  
23 Using a unique personal identification number, the Swedish authorities linked the sample

1 surveys to national register administered at Statistics Sweden to obtain demographical and  
2 socioeconomic information.

3 For our study we pooled the data from the last 14 surveys, which rendered a sample of  
4 136 301 individuals. Thereafter, we excluded people younger than 30 years. The lower age  
5 limit of 30 years was chosen since most individuals in Sweden that will complete a three-year  
6 education after high school do so before this age [37] and educational status was the indicator  
7 of socioeconomic position chosen in this study. We also excluded people with missing  
8 information on education, household composition or smoking habits. The final sample  
9 consisted on 110 044 individuals or 80.7% of the original sample (Figure 1).

10 The present investigation was approved by the Swedish Ethical Review Authority (Dnr:  
11 2019-01793) and the data safety committee at the Public Health Agency of Sweden.

## 12 Patient and public involvement

13 All data from NHS provided to researchers is anonymized, so study participants cannot be  
14 identified. The study participants were not involved in the research process.

## 15 Assessment of variables

16 Smoking status was assessed based on the answer to the question “Do you smoke?”, if the  
17 person answered “Yes” or “Yes, sometimes”, the individual was categorized as a smoker, if  
18 the respondent answered “No” the individual was considered a non-smoker.

19 We categorized *age* into three groups: 30-44, 45-64 and 65-84-year-old. We classified gender  
20 as a binary variable distinguishing between men and women as more specific information on  
21 gender was not available in the questionnaire. We classified *educational achievement* into  
22 three categories, as low if the respondent had not completed three years of high school  
23 education, as middle if they had high school education but less than three years of education  
24 after high school and high if the respondent had at least three years of education after high

1 school. Throughout 2008-2016 respondents were asked “with whom do you share  
2 household?”, we defined *household composition* as living alone if the respondent answered  
3 “with no one”, otherwise as living with other(s). In 2018 that question was not asked so  
4 individuals were defined in the same way according to the linked information provided by  
5 Statics Sweden. We classified *migration status* as native (i.e., born in Sweden) or immigrant.  
6 As a way of operationalising intersectional contexts, we created 72 strata by combining the  
7 three categories of age, the two of gender, the three of educational achievement, the two of  
8 migration status and the two categories of household composition. We used 30–45-year-old,  
9 native men living with other(s) and with high educational achievement as the reference in the  
10 comparisons, as this group was assumed to occupy the position of greatest structural  
11 privilege. This choice was based on unidimensional assumptions of structural privilege for  
12 young compared to old [38], men compared to women, high SEP compared to low SEP [39],  
13 natives compared to immigrants [40] and those living with other(s) compared to people living  
14 alone [41]. We also included the survey year of the participants using 2018 as reference in all  
15 comparisons.

## 16 **Statistical analyses**

17 The first step in our analysis was to obtain the trends in smoking prevalence and the trends in  
18 socioeconomic and demographic gradients in smoking between 2004 and 2018 (see  
19 supplementary information S1). Thereafter, we performed a stratified analysis aimed to  
20 provide a detailed map of the prevalence (i.e., absolute risk) and 95% confidence intervals  
21 (CI) of smoking across the intersectional strata. This stratification allows comparing the  
22 prevalence of smoking in different strata without any reference (Figure 2).

23 Thereafter, we performed seven consecutive regression analyses, modelling smoking as the  
24 dependent variable and survey year as well as the different demographical and socioeconomic

1 dimensions alone and in combination as explanatory variables. The use of logistic regression  
2 to obtain odds ratios (OR) is common but the OR is a good estimation of the relative risk  
3 only when the prevalence of the outcome is very small (rare event assumption) [42].  
4 Therefore, for the analysis, rather than logistic regression to obtain ORs, we used Cox  
5 proportional hazards regression with a constant follow-up time equal to one to obtain  
6 prevalence ratios (PR) [43] with 95% CI.

7 Model 1 included only survey year, model 2 added age, model 3 added gender, model 4  
8 added educational achievement, model 5 added migration status and model 6 added  
9 household composition and thus included all the variables that defined the intersectional  
10 strata. Finally, the intersectional model 7 included the same variables as model 6 but in the  
11 form of a multicategorical variable with 72 intersectional strata. Here, we used the 30–45-  
12 year-old, native men living with other(s) and with high educational achievement as the  
13 reference in the comparison.

14 For each model, we quantified its DA by means of the area under the receiver operator  
15 characteristics curve (AUC) [44]. The AUC measures the accuracy of the information  
16 provided by the variables in the model for discriminating individuals who smoke from those  
17 who don't. The AUC takes a value between 0.5 and 1, where 1 indicates perfect  
18 discrimination and 0.5 means that the studied variables have no DA at all. The AUC can even  
19 be used to qualify the size of the intersectional differences. Rather than evaluating the  
20 absolute risk differences between strata, using the AUC we assess the overlapping of the  
21 individual risk predictions (based on the intersectional strata) between smokers and non-  
22 smokers.

23 There is no fully established practical guideline for the interpretation of the size of the AUC  
24 as a measure of DA when analysing intersectional inequalities. However, based on the cut-off  
25 values provided by Hosmer and Lemeshow [45] but using more neutral denominations we

1 qualify intersectional inequalities according to the DA as (i) “absent or very small” (AUC=  
2 0.5–0.6), (ii) “moderate” (AUC >0.6–≤ 0.7), (iii) “large” (AUC >0.7– ≤ 0.8) and (iv) “very  
3 large” (AUC >0.8). Evaluating intersectional differences using only strata prevalence is  
4 insufficient as it does not consider any overlapping between the strata. Therefore, the AUC  
5 provides fundamental information for evaluation of group differences [46].

6 We further calculated the incremental change in the AUC value ( $\Delta$ -AUC) between the  
7 models. The  $\Delta$ -AUC quantifies the improvement in the DA obtained by a model, in relation  
8 to the previous model [24]. The categorical intersectional variable in model 7 allows for the  
9 capturing of interaction of effects. If any such interaction exists, the DA of model 7 will  
10 increase in comparison with model 6 and the  $\Delta$ -AUC will thus be positive.

11 We used STATA version 15.1 and IBM SPSS (Statistical Package for the Social Sciences)  
12 version 25 for PC to perform all statistical analyses.

## 13 Results

14 Over the whole study period, the prevalence of smoking was 18%. The visual analysis of the  
15 trends indicated that the prevalence of smoking monotonically decreased in Sweden from  
16 25.0% in 2004 to around 11.1% in 2018. While sex-differences were small throughout the  
17 period and the sex-category with highest smoking prevalence changed, we observed  
18 consistent differences between groups defined by age, country of birth, educational  
19 achievement and household composition. In absolute terms, the gaps between subgroups  
20 were static except for differences between age categories that narrowed in later years (see  
21 supplementary information S1).

22 Table 1 presents the prevalence of smokers and non-smokers across the included  
23 socioeconomic and demographic variables as well as across survey years. It indicates that the  
24 prevalence of smoking was higher in individuals aged 45-64 years (20.6%) than in both

1  
2  
3 1 younger (19.8%) and older people (12.4%). Women and men had similar prevalence of  
4  
5 2 smoking (17.9% vs 17.8%). As expected, smoking was more common among people with  
6  
7 3 low (21.7%) and medium (17.0%) educational achievement compared to people with high  
8  
9 4 educational achievement (11.9%). The prevalence of smoking was higher among immigrants  
10  
11 5 (23.9%) than among natives (17.0%) and the same was true for individuals living alone  
12  
13 6 (24.1%) compared to those who were living with other(s) (16.5%).  
14  
15  
16

17 7 Figure 2 shows the prevalence of smoking across the intersectional strata. We observed the  
18  
19 8 highest prevalence (54%) among 30-44-year-old immigrant men with low educational  
20  
21 9 achievement and living alone, and the lowest prevalence (6%) among 65-84-year-old native  
22  
23 10 women with high educational achievement and living together. The reference stratum (i.e.,  
24  
25 11 30–45-year-old, native men living with other(s) and with high educational achievement) used  
26  
27 12 in the relative comparisons (Table 2) presented a smoking prevalence of about 12%.  
28  
29  
30  
31

32 13 The table 3 informs that the PR of smoking decreases with age, being lowest in the old  
33  
34 14 population. This age gradient is clear after adjustment for the other variables in the model 6.  
35  
36 15 Low educational achievement, being immigrant and living alone was associated with a higher  
37  
38 16 smoking risk. However, there were no age-adjusted gender differences. The AUC in the  
39  
40 17 model including only survey year was 0.58. In the age adjusted model 2, the AUC was 0.60  
41  
42 18 and it did not increase when gender was included in model 3. The AUC increased by 0.04  
43  
44 19 units when including education. It did not increase when adding migration status but further  
45  
46 20 increased by 0.01 units when including household composition. The AUC of intersectional  
47  
48 21 model 7 was 0.66, with 95%CI overlapping the AUC of model 6 indicating no conclusive  
49  
50 22 intersectional interaction.  
51  
52  
53  
54  
55

56 23 Table 2 shows the 10 strata with the lowest and the 10 strata with the highest PRs of smoking  
57  
58 24 using the strata of young native men with high educational achievement and living with  
59  
60



1 other(s) as reference. The lowest PR= 0.55 was observed in older native women with high  
2 educational achievement and living with other(s) and the highest PR= 4.45 was observed in  
3 young immigrant men with low educational achievement and living alone. When comparing  
4 with the reference stratum of native young men with high educational achievement and living  
5 with other(s), we observed that low educational achievement, being immigrant and living  
6 alone were respectively present in seven, eight and nine of the ten strata with the highest risk  
7 of smoking (see the Supplementary information S2 for the complete list of PR-values).

## 8 Discussion

### 9 Main findings

10 Our study provides an improved mapping of the distribution of the smoking habit in Sweden  
11 compared to unidimensional analyses. Rather than focusing on single socioeconomic and  
12 demographical variables, we use an intersectional AIHDA analysis that uncovers the  
13 socioeconomic and demographical heterogeneity existing in the country. We also applied the  
14 AUC to obtain information on the accuracy of the intersectional grouping for identifying  
15 individuals according to their smoking status. We found a moderate AUC= 0.66, which  
16 indicates that individual risk of smoking considerably overlaps between the intersectional  
17 strata and that neither the anti-categorical nor the inter-categorical intersectionality  
18 approaches are fully supported. We found that the stratum-specific risks were due to the main  
19 effects of the different variables used to define the intersectional strata without any  
20 conclusive interactive component.

21 We found intersectional strata with a rather high prevalence of smoking. For instance, the  
22 prevalence of smoking in young immigrant men with low educational achievement and living  
23 alone was 54%. Interestingly, while high educational achievement generally prevents

1 smoking, young immigrant women that lived alone had a PR of 2.87 (1.86-4.42) despite their  
2  
3  
4  
5  
6  
7  
8  
9  
10  
11  
12  
13  
14  
15  
16  
17  
18  
19  
20  
21  
22  
23  
24  
25  
26  
27  
28  
29  
30  
31  
32  
33  
34  
35  
36  
37  
38  
39  
40  
41  
42  
43  
44  
45  
46  
47  
48  
49  
50  
51  
52  
53  
54  
55  
56  
57  
58  
59  
60

1 smoking, young immigrant women that lived alone had a PR of 2.87 (1.86-4.42) despite their  
2 high educational achievement. This indicates that the protective effect of high education may  
3 depend on other variables such as migration status and gender. Our finding could  
4 hypothetically reflect both smoking culture in the country of birth of the individual or that  
5 discrimination on the basis of gender or migration status may contribute to making education  
6 a poorer indicator of socioeconomic position in this group.

### 7 Relation to previous studies

8 In spite of the use of different definitions and measurements of smoking habits as well as the  
9 use of different indicators of socioeconomic position, many previous publications have  
10 shown the existence of socioeconomic, ethnic and demographical differences in smoking [2,  
11 4, 47]. However, as far we known, only a few have considered the intersectional approach  
12 [11, 14, 15]. The heterogeneous distribution of smoking prevalence we found in Sweden is in  
13 accordance with recent intersectional research on smoking cessation in the U.S. adult  
14 population [15].

15 High education may influence smoking through both direct effects, such as increased  
16 understanding of detrimental health effects of smoking, and indirect effects such as social and  
17 material circumstances [48]. Educational achievement is the preferred indicator of  
18 socioeconomic position in previous public health reports in Sweden [49]. We performed a  
19 sensitivity analysis where we included income instead of education and the results were very  
20 similar and are provided as supplementary material (S3).

21 In a comparison of the relative importance of low education on smoking prevalence across  
22 age- and gender groups in Denmark and Sweden, Eek et al. found that the effect of low  
23 education on smoking prevalence and continuation of smoking was strongest among younger

1 women in Sweden, indicating a failure of tobacco prevention interventions to reach this group  
2 [1]. While immigrant men were clearly overrepresented among the strata with highest  
3 prevalence of smoking, this was not the case for women. This pattern was also found by  
4 Lindström et al in a study from southern Sweden showing lower rates of smoking among men  
5 born in Sweden, but higher rates of smoking among women born in Sweden compared to  
6 men and women from most other country groups [8]. These differences were attributable to  
7 different smoking prevalence in the countries of origins of the immigrants, potentially  
8 representing different stages of the smoking transition. The distribution of smoking  
9 prevalence across age groups we found is similar to the pattern observed by Ali et al in a  
10 study from southern Sweden [50].

## 11 Strengths and limitations

12 The cross-sectional and observational character of this study prevents causal conclusions.  
13 However, the variables included in our analyses are to a little extent effected by smoking  
14 status, so the causal direction can be presumed to go from sociodemographic variables  
15 towards smoking rather than the opposite.

16 A weakness in our study is that the participation rates were rather low, especially during the  
17 last years. An analyses of the non-participants performed by Statistics Sweden shows that  
18 people with low income, people born outside Sweden and people living alone were less likely  
19 to be responders [51]. Therefore, if the prevalence of smoking is higher in non-participants,  
20 our analysis may have underestimated the existing socioeconomic differences. In a sensitivity  
21 analysis we utilized data that had been weighted by Statistics Sweden in order to reduce  
22 skewness resulting from non-participating individuals. The variables used to perform the  
23 weighting were age, gender, educational level, country of birth, household composition and  
24 urban/rural [52]. These results were very similar, which was expected since the intersectional

1 variable included all weighting variables except rural/urban. Our study represents the  
2 Swedish circumstances so the AIHDA-approach should be replicated in different contexts.  
3  
4 A further limitation of this study is the simple categorizations of the dimensions incorporated  
5 in the intersectional matrix. Gender was binary defined which neglects the existence of  
6 numerous gender identities. Migration status was binary defined as natives and immigrants,  
7 which may hide heterogeneity in smoking prevalence. A more detailed classification with  
8 four categories (i.e., Sweden, Nordic countries, Europe and Outside Europe) shows that all  
9 the categories except women born outside Europe had a higher prevalence than the  
10 individuals born in Sweden (see supplementary material 4). The used categorizations stem in  
11 part from the information available in the survey and in part from the aim of presenting a  
12 parsimonious intersectional model that is easier to adopt in public health analyses and by the  
13 fact that several strata would be empty or contain very few individuals if the intersectional  
14 matrix was expanded.  
15  
16 We also performed a sensitivity analysis excluding “sometimes smokers” from the smoker  
17 category. As expected, overall prevalence was lower, 11% compared to 18%, and  
18 intersectional disparities larger. The AUC of the intersectional model 7 was 0.70 compared to  
19 0.66 in the main analysis. Our main results combined with the results from the sensitivity  
20 analysis reflect the existence of socioeconomic disparities not only in prevalence, but also in  
21 intensity, of smoking [53]. Our results therefore may underestimate the intersectional  
22 disparities in health hazards attributable to smoking.

## 23 **Implications and future studies**

24 There is a growing body of literature focusing on how to perform quantitative intersectional  
25 research [27, 36], with the emergence of multilevel AIHDA (MAIHDA) as a recent example

1 [28, 29, 34]. However, in spite of providing complementary information [34], the fixed  
2 effects AIHDA approach we use in our study is rather accessible and share crucial advantages  
3 of the MAIHDA. First, the AIHDA provides an intersectional mapping that is more  
4 appropriate than unidimensional analyses to identify specifically vulnerable population  
5 groups in which interventions could be effective. Second, by going beyond average  
6 probabilistic measurements (i.e., prevalence) and also analysing DA we get a quantification  
7 of the heterogeneity around the averages [46]. From the AIHDA we found that the DA of our  
8 intersectional model was only moderate which indicates the necessity for universal  
9 interventions due to a large unexplained heterogeneity. However, we also identified that the  
10 three most vulnerable groups (i.e., strata) included immigrant men with low education  
11 younger than 65 years. This finding suggest that special preventive measures should be  
12 directed to these groups. Furthermore, research methods that actively involves members of  
13 marginalized groups and has the explicit purpose to result in public health improvements are  
14 developing and could be one way forward [54].

15 Interventions to reduce smoking prevalence should address Social Determinants of Health  
16 (SDH) at all levels. Examples targeted directly at smoking include increased tobacco  
17 taxation, smoke free zones and public anti-smoking campaigns [55]. Stigmatization is a  
18 negative side effect of such interventions that need to be taken into account, especially for  
19 low SEP groups [56]. Qualitative intersectional research has provided important insights into  
20 how the stigma of smoking interacts with identities of low class, country of birth, being a bad  
21 mother and may be in conflict with norms of femininity [57].

22 Equal access to education, housing and healthy recreation, regardless of gender,  
23 socioeconomic status, migration status and household composition, is important to reduce  
24 smoking prevalence. Therefore, institutions outside the health care system play an important

1 role to redistribute resources and access to SDH [58, 59], in order to counterweight the  
2 accelerating tendency of accumulation of resources among a very rich minority that  
3 characterizes modern capitalism [60]. This requires political decisions that prioritize  
4 population health aims more than market oriented reforms that exacerbate health inequities  
5 [61]. Health politics should adopt an intersectional perspective when redistributing resources  
6 in order to reduce the complex disparities in smoking revealed in this study.

## 7 Conclusions

8 Compared with studies focused on single variables, the intersectional AIHDA offers a better  
9 mapping of the socioeconomic and demographical distribution of smoking in Sweden.  
10 However, the moderate DA found in the AIHDA analysis suggested the existence of  
11 substantial unexplained heterogeneity in smoking risk within the different intersectional strata  
12 defined by age, gender, education, household composition and migration status. An  
13 intersectional AIHDA approach is necessary to understand the existing socioeconomic and  
14 demographic complexity influencing smoking behaviour. Future studies should identify  
15 preventive measures that are guided by proportionate universalism to find practical ways  
16 forwards to reduce intersectional disparities in smoking prevalence.

## 17 Footnotes

### 18 Funding

19 This work was supported by grants to Juan Merlo (PI) from the Swedish Research Council  
20 (Vetenskapsrådet) for the project “*Multilevel Analyses of Individual Heterogeneity:  
21 innovative concepts and methodological approaches in Public Health and Social  
22 Epidemiology*” (<https://www.swecris.se/betasearch/details/project/201701321VR?lang=en>).

1 Project id: 2017-01321.) The study was also supported by a grant for advanced doctoral  
2 studies from the Faculty of Medicine at Lund University (Dnr 2020/1125, SAF)

3 The funders had no role in study design, data collection and analysis, decision to publish, or  
4 preparation of the manuscript.

5 We acknowledge the staff and participants of all the national health surveys that has made  
6 this study possible.

### 7 Contributors

8 SAF and JM had the original idea of the study. SAF wrote the initial version of the paper,  
9 SAF, JM, RPV and ML participated in the design, analysis, interpretation of data and  
10 drafting of the article. All authors approved both the original and revised versions to be  
11 published. JM is the guarantor of the article.

### 12 Conflict of interest

13 There are no conflicts of interest.

### 14 Data sharing statement

15 The original databases from the Public Health Agency of Sweden used in this study are  
16 protected by strict rules of confidentiality that cover sensitive individual information  
17 including data regarding health and health behaviours. The data can be made available for  
18 research after review by a regional Ethics Committee and the Public Health Agency's own  
19 safety committee.

### 20 Ethics approval

21 The present investigation was approved by the Swedish Ethical Review Authority (Dnr:  
22 2019-01793) and the data safety committee at the Public Health Agency of Sweden.

1  
2  
3 1 License statement  
4  
5

6 2 I, the Submitting Author has the right to grant and does grant on behalf of all authors of the  
7  
8 3 Work (as defined in the below author licence), an exclusive licence and/or a non-exclusive  
9  
10 4 licence for contributions from authors who are: i) UK Crown employees; ii) where BMJ has  
11  
12 5 agreed a CC-BY licence shall apply, and/or iii) in accordance with the terms applicable for  
13  
14 6 US Federal Government officers or employees acting as part of their official duties; on a  
15  
16 7 worldwide, perpetual, irrevocable, royalty-free basis to BMJ Publishing Group Ltd (“BMJ”)  
17  
18 8 its licensees and where the relevant Journal is co-owned by BMJ to the co-owners of the  
19  
20 9 Journal, to publish the Work in any BMJ products and to exploit all rights, as set out in  
21  
22 10 our licence.  
23  
24  
25  
26  
27  
28  
29  
30  
31  
32  
33  
34  
35  
36  
37  
38  
39  
40  
41  
42  
43  
44  
45  
46  
47  
48  
49  
50  
51  
52  
53  
54  
55  
56  
57  
58  
59  
60



1

## 2 References

- 3 [1] Eek F, Ostergren P-O, Diderichsen F, *et al.* Differences in socioeconomic and gender  
4 inequalities in tobacco smoking in Denmark and Sweden; a cross sectional comparison of the  
5 equity effect of different public health policies. *BMC public health* 2010;**10**:9-9.
- 6 [2] Kuntz B, Lampert T. Educational differences in smoking among adolescents in  
7 Germany: what is the role of parental and adolescent education levels and intergenerational  
8 educational mobility? *International journal of environmental research and public health*  
9 2013;**10**(7):3015-3032.
- 10 [3] Härkönen J, Lindberg M, Karlsson L, *et al.* Education is the strongest socio-economic  
11 predictor of smoking in pregnancy. *Addiction* 2018;**113**(6):1117-1126.
- 12 [4] Hiscock R, Bauld L, Amos A, *et al.* Socioeconomic status and smoking: a review.  
13 *Annals of the New York Academy of Sciences* 2012;**1248**(1):107-123.
- 14 [5] Graham H. Gender and class as dimensions of smoking behaviour in Britain: insights  
15 from a survey of mothers. *Social science & medicine (1982)* 1994;**38**(5):691-698.
- 16 [6] Joffer J, Burell G, Bergstrom E, *et al.* Predictors of smoking among Swedish  
17 adolescents. *BMC public health* 2014;**14**:1296.
- 18 [7] Gilman SE, Martin LT, Abrams DB, *et al.* Educational attainment and cigarette  
19 smoking: a causal association? *International journal of epidemiology* 2008;**37**(3):615-624.
- 20 [8] Lindstrom M, Sundquist J. Ethnic differences in daily smoking in Malmo, Sweden.  
21 Varying influence of psychosocial and economic factors. *European journal of public health*  
22 2002;**12**(4):287-294.
- 23 [9] Lindstrom M, Giordano GN. Changes in Social Capital and Cigarette Smoking  
24 Behavior Over Time: A Population-Based Panel Study of Temporal Relationships. *Nicotine  
25 & tobacco research : official journal of the Society for Research on Nicotine and Tobacco*  
26 2016;**18**(11):2106-2114.
- 27 [10] Ramstrom L, Borland R, Wikmans T. Patterns of Smoking and Snus Use in Sweden:  
28 Implications for Public Health. *Int J Environ Res Public Health* 2016;**13**(11).
- 29 [11] Amroussia N, Pearson JL, Gustafsson PE. What drives us apart? Decomposing  
30 intersectional inequalities in cigarette smoking by education and sexual orientation among  
31 U.S. adults. *International journal for equity in health* 2019;**18**(1):109.
- 32 [12] Mena E, Bolte G, Group AGS. Intersectionality-based quantitative health research  
33 and sex/gender sensitivity: a scoping review. *International journal for equity in health*  
34 2019;**18**(1):199-199.
- 35 [13] Bilal U, Beltrán P, Fernández E, *et al.* Gender equality and smoking: a theory-driven  
36 approach to smoking gender differences in Spain. *Tobacco control* 2016;**25**(3):295-300.
- 37 [14] Aguirre CG, Bello MS, Andrabi N, *et al.* Gender, Ethnicity, and Their  
38 Intersectionality in the Prediction of Smoking Outcome Expectancies in Regular Cigarette  
39 Smokers. *Behavior modification* 2016;**40**(1-2):281-302.
- 40 [15] Potter LN, Lam CY, Cinciripini PM, *et al.* Intersectionality and Smoking Cessation:  
41 Exploring Various Approaches for Understanding Health Inequities. *Nicotine & Tobacco  
42 Research* 2020.
- 43 [16] Neuberger M. Tobacco control: prevention and cessation in Europe. *memo -  
44 Magazine of European Medical Oncology* 2019;**12**(2):156-161.
- 45 [17] Golden SD, Farrelly MC, Luke DA, *et al.* Comparing projected impacts of cigarette  
46 floor price and excise tax policies on socioeconomic disparities in smoking. *Tobacco control*  
47 2016;**25**(Suppl 1):i60.

21

- 1 [18] Bauld L, Judge K, Platt S. Assessing the impact of smoking cessation services on  
2 reducing health inequalities in England: observational study. *Tobacco control*  
3 2007;**16**(6):400-404.
- 4 [19] Vilhelmsson A, Ostergren PO. Reducing health inequalities with interventions  
5 targeting behavioral factors among individuals with low levels of education - A rapid review.  
6 *PloS one* 2018;**13**(4):e0195774.
- 7 [20] Wendel-Vos GC, Dutman AE, Verschuren WM, *et al.* Lifestyle factors of a five-year  
8 community-intervention program: the Hartslag Limburg intervention. *American journal of*  
9 *preventive medicine* 2009;**37**(1):50-56.
- 10 [21] Marmot M, Bell R. Fair society, healthy lives. *Public health* 2012;**126 Suppl 1**:S4-  
11 s10.
- 12 [22] Carey G, Crammond B, De Leeuw E. Towards health equity: a framework for the  
13 application of proportionate universalism. *International journal for equity in health*  
14 2015;**14**:81.
- 15 [23] Wemrell M, Bennet L, Merlo J. Understanding the complexity of socioeconomic  
16 disparities in type 2 diabetes risk: a study of 4.3 million people in Sweden. *MJ Open Diabetes*  
17 *Research and Care* 2019;**9**;7:e000749.
- 18 [24] Merlo J, Wagner P, Leckie G. A simple multilevel approach for analysing  
19 geographical inequalities in public health reports: The case of municipality differences in  
20 obesity. *Health & place* 2019;**58**:102145.
- 21 [25] K C. Demarginalizing the intersection of race and sex: a Black feminist critique of  
22 antidiscrimination doctrine, feminist theory and antiracist politics. *University of Chicago*  
23 *Legal Forum* 1989(139).
- 24 [26] Bauer GR. Incorporating intersectionality theory into population health research  
25 methodology: challenges and the potential to advance health equity. *Soc Sci Med*  
26 2014;**110**:10-17.
- 27 [27] Bowleg L. When Black plus Lesbian plus Woman not equal Black Lesbian Woman:  
28 The methodological challenges of qualitative and quantitative intersectionality research. *Sex*  
29 *Roles* 2008;**59**(5-6):312-325.
- 30 [28] Merlo J. Multilevel analysis of individual heterogeneity and discriminatory accuracy  
31 (MAIHDA) within an intersectional framework. *Social science & medicine (1982)*  
32 2018;**203**:74-80.
- 33 [29] Wemrell M, Mulinari S, Merlo J. An intersectional approach to multilevel analysis of  
34 individual heterogeneity (MAIH) and discriminatory accuracy. *Social science & medicine*  
35 *(1982)* 2017;**178**:217-219.
- 36 [30] Green MA, Evans CR, Subramanian SV. Can intersectionality theory enrich  
37 population health research? *Social science & medicine (1982)* 2017;**178**:214-216.
- 38 [31] Axelsson Fisk S, Mulinari S, Wemrell M, *et al.* Chronic Obstructive Pulmonary  
39 Disease in Sweden: An intersectional multilevel analysis of individual heterogeneity and  
40 discriminatory accuracy. *SSM Popul Health* 2018;**4**:334-346.
- 41 [32] Persmark A, Wemrell M, Zettermark S, *et al.* Precision public health: Mapping  
42 socioeconomic disparities in opioid dispensations at Swedish pharmacies by Multilevel  
43 Analysis of Individual Heterogeneity and Discriminatory Accuracy (MAIHDA). *PLoS One*  
44 2019;**14**(8):e0220322.
- 45 [33] Evans CR, Erickson N. Intersectionality and depression in adolescence and early  
46 adulthood: A MAIHDA analysis of the national longitudinal study of adolescent to adult  
47 health, 1995-2008. *Social science & medicine (1982)* 2019;**220**:1-11.
- 48 [34] Evans CR, Leckie G, Merlo J. Multilevel versus single-level regression for the  
49 analysis of multilevel information: The case of quantitative intersectional analysis. *Social*  
50 *science & medicine (1982)* 2019:112499.

- 1 [35] Evans CR, Williams DR, Onnela JP, *et al.* A multilevel approach to modeling health  
2 inequalities at the intersection of multiple social identities. *Soc Sci Med* 2017.
- 3 [36] McCall L. The complexity of intersectionality. *Signs: Journal of women in culture*  
4 *and society* 2005;**30**(3):1771-1800.
- 5 [37] OECD. Tertiary-type A graduation rates in 1995, 2000 and 2008 (first-time  
6 graduation) 2010.
- 7 [38] McMullin JA, Cairney J. Self-esteem and the intersection of age, class, and gender.  
8 *Journal of Aging Studies* 2004;**18**(1):75-90.
- 9 [39] Krieger N. A glossary for social epidemiology. *Journal of epidemiology and*  
10 *community health* 2001;**55**(10):693.
- 11 [40] Karlsten S, Nazroo JY. Measuring and analyzing “race,” racism, and racial  
12 discrimination. *Methods in social epidemiology* 2017;**2**:43.
- 13 [41] Alm S, Nelson K, Nieuwenhuis R. The Diminishing Power of One? Welfare State  
14 Retrenchment and Rising Poverty of Single-Adult Households in Sweden 1988–2011.  
15 *European Sociological Review* 2019;**36**(2):198-217.
- 16 [42] Davies HT, Crombie IK, Tavakoli M. When can odds ratios mislead? *BMJ (Clinical*  
17 *research ed)* 1998;**316**(7136):989-991.
- 18 [43] Barros AJ, Hiraakata VN. Alternatives for logistic regression in cross-sectional studies:  
19 an empirical comparison of models that directly estimate the prevalence ratio. *BMC Med Res*  
20 *Methodol* 2003;**3**:21.
- 21 [44] Pepe MS, Janes H, Longton G, *et al.* Limitations of the odds ratio in gauging the  
22 performance of a diagnostic, prognostic, or screening marker. *American journal of*  
23 *epidemiology* 2004;**159**(9):882-890.
- 24 [45] Hosmer DW, Lemeshow S. Applied logistic regression. 2nd ed. New York: Wiley  
25 2000.
- 26 [46] Merlo J, Wagner P, Leckie G. A simple multilevel approach for analysing  
27 geographical inequalities in public health reports: The case of municipality differences in  
28 obesity. *Health Place* 2019;**58**:102145.
- 29 [47] Landberg J, Ramstedt M, Sundin E. Socioekonomiska skillnader i beroende och  
30 utsatthet för andras användning av alkohol, narkotika och tobak. Stockholm:  
31 Centralförbundet för alkohol- och narkotikaupplysning 2018.
- 32 [48] Östergren O. Understanding the educational gradient in Mortality: Department of  
33 Sociology, Stockholm University 2017.
- 34 [49] Folkhälsomyndigheten SkoR. Regional comparisons public health 2019.  
35 [www.folkhalsomyndigheten.se/publicerat-material](http://www.folkhalsomyndigheten.se/publicerat-material) 2018.
- 36 [50] Ali SM, Chaix B, Merlo J, *et al.* Gender differences in daily smoking prevalence in  
37 different age strata: A population-based study in southern Sweden. *Scandinavian journal of*  
38 *public health* 2009;**37**(2):146-152.
- 39 [51] Franzén M. Extra bortfallsanalys. Statistics Sweden 2018.
- 40 [52] Franzén M. Kalibreringsrapport Nationellt Urval. Stockholm: Statistics Sweden 2015.
- 41 [53] Bobak M, Jarvis MJ, Skodova Z, *et al.* Smoke intake among smokers is higher in  
42 lower socioeconomic groups. *Tobacco control* 2000;**9**(3):310.
- 43 [54] Andrews JO, Newman SD, Heath J, *et al.* Community-based participatory research  
44 and smoking cessation interventions: a review of the evidence. *Nursing Clinics*  
45 2012;**47**(1):81-96.
- 46 [55] Dahlgren G, Whitehead M. Policies and strategies to promote social equity in health.  
47 1991.
- 48 [56] Graham H. Smoking, Stigma and Social Class. *Journal of Social Policy*  
49 2011;**41**(1):83-99.

- 1  
2  
3 1 [57] Triandafilidis Z, Ussher JM, Perz J, *et al.* An Intersectional Analysis of Women's  
4 2 Experiences of Smoking-Related Stigma. *Qualitative Health Research* 2016;**27**(10):1445-  
5 3 1460.  
6 4 [58] Gkiouleka A, Huijts T, Beckfield J, *et al.* Understanding the micro and macro politics  
7 5 of health: Inequalities, intersectionality & institutions-A research agenda. *Social Science &*  
8 6 *Medicine* 2018;**200**:92-98.  
9 7 [59] Bambra C, Fox D, Scott-Samuel A. Towards a politics of health. *Health promotion*  
10 8 *international* 2005;**20**(2):187-193.  
11 9 [60] Piketty T. About capital in the twenty-first century. *American Economic Review*  
12 10 2015;**105**(5):48-53.  
13 11 [61] Burström B. Market-Oriented, Demand-Driven Health Care Reforms and Equity in  
14 12 Health and Health Care Utilization in Sweden. *International Journal of Health Services*  
15 13 2009;**39**(2):271-285.  
16 14  
17 15  
18  
19  
20  
21  
22  
23  
24  
25  
26  
27  
28  
29  
30  
31  
32  
33  
34  
35  
36  
37  
38  
39  
40  
41  
42  
43  
44  
45  
46  
47  
48  
49  
50  
51  
52  
53  
54  
55  
56  
57  
58  
59  
60

1 **Tables**

**Table 1.** Distribution (prevalence) of smokers across categories of age, gender, education, migration and household composition in the 110,044 participants in the Swedish National Health Surveys (2004 – 2018). Values are number (and percentage) of individuals.

|                      | Non smokers     | Smokers         |
|----------------------|-----------------|-----------------|
| 30-44                | 22,799 (80.23%) | 5,618 (19.77%)  |
| 45-64                | 38,024 (79.41%) | 9,862 (20.59%)  |
| 65-84                | 29,575 (87.65%) | 4,166 (12.35%)  |
| Female               | 48,782 (82.08%) | 10,653 (17.92%) |
| Male                 | 41,616 (82.23%) | 8,993 (17.77%)  |
| Low                  | 38,791 (78.32%) | 10,738 (21.68%) |
| Middle               | 27,716 (83.02%) | 5,670 (16.98)   |
| High                 | 23,891 (88.06%) | 3,238 (11.94%)  |
| Immigrant            | 10,410 (76.07%) | 3,274 (23.93%)  |
| Native               | 79,988 (83.01%) | 16,372 (16.99%) |
| Living with other(s) | 75,625 (83.48%) | 14,964 (16.52%) |
| Living Alone         | 14,773 (75.93%) | 4,682 (24.07%)  |
| 2004                 | 6,803 (75.03%)  | 2,264 (24.97%)  |
| 2005                 | 3,339 (75.90%)  | 1,060 (24.10%)  |
| 2006                 | 3,450 (77.62%)  | 995 (22.38%)    |
| 2007                 | 3,272 (77.81%)  | 933 (22.19%)    |
| 2008                 | 6,525 (79.07%)  | 1,727 (20.93%)  |
| 2009                 | 6,123 (79.22%)  | 1,606 (20.78%)  |
| 2010                 | 6,718 (80.59%)  | 1,618 (19.41%)  |
| 2011                 | 6,760 (82.56%)  | 1,428 (17.44%)  |
| 2012                 | 6,893 (82.68%)  | 1,444 (17.32%)  |
| 2013                 | 6,770 (83.10%)  | 1,377 (16.90%)  |
| 2014                 | 6,845 (83.74%)  | 1,329 (16.26%)  |
| 2015                 | 6,978 (84.21%)  | 1,308 (15.79%)  |
| 2016                 | 7,086 (88.13%)  | 954 (11.87%)    |
| 2018                 | 12,836 (88.90%) | 1,603 (11.10%)  |

**Table 2.** Results from the intersectional model 7 indicating the 10 highest and 10 lowest Prevalence Ratio (PR) with 95% confidence intervals (CI) of smoking across intersectional strata in the Swedish population using the stratum of young, native, men with high education that were living with other(s) (LWO) as reference in the comparisons.

| Age                                | Gender      | Educational achievement | Migration status | Household composition | PR (95% CI)      |
|------------------------------------|-------------|-------------------------|------------------|-----------------------|------------------|
| 65-84                              | Female      | High                    | Native           | LWO                   | 0.55 (0.45-0.69) |
| 65-84                              | Male        | High                    | Native           | LWO                   | 0.58 (0.48-0.71) |
| 65-84                              | Female      | High                    | Immigrant        | LWO                   | 0.61 (0.33-1.11) |
| 65-84                              | Female      | Middle                  | Native           | LWO                   | 0.80 (0.66-0.96) |
| 65-84                              | Female      | High                    | Native           | Living alone          | 0.83 (0.64-1.06) |
| 65-84                              | Male        | Middle                  | Native           | LWO                   | 0.85 (0.73-0.99) |
| 30-44                              | Female      | High                    | Native           | LWO                   | 0.86 (0.74-0.98) |
| 65-84                              | Male        | High                    | Immigrant        | Living alone          | 0.91 (0.38-2.21) |
| 45-64                              | Male        | High                    | Native           | LWO                   | 0.92 (0.8-1.07)  |
| 65-84                              | Male        | Low                     | Native           | LWO                   | 0.96 (0.84-1.11) |
| 30-44                              | <b>Male</b> | <b>High</b>             | <b>Native</b>    | <b>LWO</b>            | <b>Reference</b> |
| 30-44                              | Female      | High                    | Immigrant        | Living alone          | 2.87 (1.86-4.42) |
| 30-44                              | Female      | Low                     | Native           | Living alone          | 2.95 (2.29-3.78) |
| 45-64                              | Female      | Low                     | Native           | Living alone          | 2.99 (2.61-3.41) |
| 45-64                              | Male        | Middle                  | Immigrant        | Living alone          | 3.10 (2.26-4.26) |
| 45-64                              | Female      | Low                     | Immigrant        | Living alone          | 3.22 (2.56-4.06) |
| 30-44                              | Male        | Middle                  | Immigrant        | Living alone          | 3.33 (2.35-4.71) |
| 30-44                              | Female      | Low                     | Immigrant        | Living alone          | 3.41 (1.96-5.94) |
| 45-64                              | Male        | Low                     | Immigrant        | Living alone          | 3.61 (2.90-4.50) |
| 30-44                              | Male        | Low                     | Immigrant        | LWO                   | 3.66 (3.07-4.35) |
| 30-44                              | Male        | Low                     | Immigrant        | Living alone          | 4.45 (3.29-6.03) |
| AUC                                |             |                         |                  |                       | 0.66 (0.65-0.66) |
| $\Delta$ AUC compared with model 6 |             |                         |                  |                       | 0.01             |

1

2

**Table 3.** Prevalence ratios (PR) and 95%-confidence intervals (CI), of smoking among people aged 30-84 included in the National Health Surveys between 2004 and 2018 in relation to survey year, age, gender, education, migration status and household composition. Model 7 includes the same variables as model 6 but as a multicategorical variable, The PRs and AUC for model 7 are presented in the table 2. AUC-values with 95%CI representing the discriminatory accuracy and  $\Delta$ AUC-values of the models are also presented.

|                  | Model 1              | Model 2             | Model 3             | Model 4             | Model 5             | Model 6             |
|------------------|----------------------|---------------------|---------------------|---------------------|---------------------|---------------------|
| <b>Year</b>      |                      |                     |                     |                     |                     |                     |
| 2004             | 2.25<br>(2.11-2.40)  | 2.07<br>(1.95-2.21) | 2.08<br>(1.95-2.21) | 1.85<br>(1.74-1.98) | 1.88<br>(1.76-2.00) | 1.84<br>(1.73-1.97) |
| 2005             | 2.17<br>(2.01-2.35)  | 2.01<br>(1.86-2.17) | 2.01<br>(1.86-2.17) | 1.83<br>(1.69-1.98) | 1.85<br>(1.71-2.00) | 1.83<br>(1.69-1.98) |
| 2006             | 2.02<br>(1.86-2.18)  | 1.87<br>(1.72-2.02) | 1.87<br>(1.72-2.02) | 1.70<br>(1.57-1.84) | 1.71<br>(1.58-1.85) | 1.68<br>(1.55-1.82) |
| 2007             | 2.00<br>(1.84-2.17)  | 1.86<br>(1.71-2.01) | 1.86<br>(1.71-2.01) | 1.71<br>(1.57-1.85) | 1.65<br>(1.54-1.77) | 1.70<br>(1.56-1.84) |
| 2008             | 1.89<br>(1.76-2.02)  | 1.76<br>(1.64-1.88) | 1.76<br>(1.64-1.88) | 1.64<br>(1.53-1.75) | 1.66<br>(1.55-1.78) | 1.63<br>(1.52-1.74) |
| 2009             | 1.87<br>(1.75-2.01)  | 1.75<br>(1.64-1.89) | 1.76<br>(1.64-1.88) | 1.65<br>(1.54-1.77) | 1.62<br>(1.51-1.73) | 1.63<br>(1.52-1.75) |
| 2010             | 1.75<br>(1.63-1.87)  | 1.70<br>(1.58-1.82) | 1.70<br>(1.58-1.82) | 1.61<br>(1.50-1.72) | 1.46<br>(1.36-1.57) | 1.59<br>(1.48-1.70) |
| 2011             | 1.57<br>(1.46-1.69)  | 1.53<br>(1.43-1.64) | 1.53<br>(1.43-1.64) | 1.45<br>(1.35-1.56) | 1.47<br>(1.37-1.58) | 1.43<br>(1.33-1.54) |
| 2012             | 1.56<br>(1.45-1.68)  | 1.53<br>(1.42-1.64) | 1.53<br>(1.42-1.64) | 1.47<br>(1.37-1.57) | 1.45<br>(1.35-1.56) | 1.44<br>(1.34-1.55) |
| 2013             | 1.52<br>(1.42-1.64)  | 1.49<br>(1.39-1.60) | 1.49<br>(1.39-1.60) | 1.45<br>(1.35-1.55) | 1.45<br>(1.35-1.56) | 1.42<br>(1.32-1.52) |
| 2014             | 1.47 (1.36-<br>1.75) | 1.45<br>(1.35-1.56) | 1.45<br>(1.35-1.56) | 1.41<br>(1.31-1.52) | 1.42<br>(1.32-1.53) | 1.39<br>(1.30-1.50) |
| 2015             | 1.42<br>(1.32-1.53)  | 1.40<br>(1.30-1.51) | 1.40<br>(1.30-1.51) | 1.37<br>(1.27-1.47) | 1.38<br>(1.28-1.48) | 1.35<br>(1.26-1.46) |
| 2016             | 1.07<br>(0.99-1.16)  | 1.06<br>(0.97-1.14) | 1.06<br>(0.97-1.14) | 1.04<br>(0.96-1.13) | 1.05<br>(0.97-1.13) | 1.03<br>(0.95-1.11) |
| 2018             | Reference            | Reference           | Reference           | Reference           | Reference           | Reference           |
| <b>Age</b>       |                      |                     |                     |                     |                     |                     |
| 30-44            |                      | Reference           | Reference           | Reference           | Reference           | Reference           |
| 45-64            |                      | 1.06<br>(1.03-1.10) | 1.06<br>(1.03-1.10) | 0.94<br>(0.91-0.97) | 0.94<br>(0.91-0.98) | 0.93<br>(0.90-0.96) |
| 65-84            |                      | 0.68<br>(0.65-0.71) | 0.68<br>(0.65-0.71) | 0.56<br>(0.54-0.58) | 0.57<br>(0.55-0.59) | 0.53<br>(0.51-0.56) |
| <b>Gender</b>    |                      |                     |                     |                     |                     |                     |
| Male             |                      |                     | Reference           | Reference           | Reference           | Reference           |
| Female           |                      |                     | 1.00<br>(0.97-1.02) | 1.02<br>(0.99-1.05) | 1.02<br>(0.99-1.05) | 1.01<br>(0.98-1.04) |
| <b>Education</b> |                      |                     |                     |                     |                     |                     |
| Low              |                      |                     |                     | 1.96<br>(1.88-2.04) | 1.96<br>(1.88-2.04) | 1.93<br>(1.86-2.01) |
| Middle           |                      |                     |                     | 1.42<br>(1.36-1.48) | 1.43<br>(1.37-1.49) | 1.42<br>(1.36-1.49) |
| High             |                      |                     |                     | Reference           | Reference           | Reference           |

1  
2  
3  
4  
5  
6  
7  
8  
9  
10  
11  
12  
13  
14  
15  
16  
17  
18  
19  
20  
21  
22  
23  
24  
25  
26  
27  
28  
29  
30  
31  
32  
33  
34  
35  
36  
37  
38  
39  
40  
41  
42  
43  
44  
45  
46  
47  
48  
49  
50  
51  
52  
53  
54  
55  
56  
57  
58  
59  
60

1

Born in  
SwedenNative  
ImmigrantReference  
1.39  
(1.34-1.45)      Reference  
1.39  
(1.24-1.44)Living  
aloneLiving  
alone  
living with  
other(s)1.53  
(1.48-1.58)  
Reference

|              |                     |                     |                     |                     |                     |                     |
|--------------|---------------------|---------------------|---------------------|---------------------|---------------------|---------------------|
| AUC          | 0.58<br>(0.58-0.59) | 0.60<br>(0.60-0.61) | 0.60<br>(0.60-0.61) | 0.64<br>(0.63-0.64) | 0.64<br>(0.64-0.65) | 0.65<br>(0.65-0.66) |
| $\Delta$ AUC | -                   | 0.02                | 0.00                | 0.04                | 0.00                | 0.01                |

For peer review only



1  
2  
3  
4  
5  
6  
7  
8  
9  
10  
11  
12  
13  
14  
15  
16  
17  
18  
19  
20  
21  
22  
23  
24  
25  
26  
27  
28  
29  
30  
31  
32  
33  
34  
35  
36  
37  
38  
39  
40  
41  
42  
43  
44  
45  
46  
47  
48  
49  
50  
51  
52  
53  
54  
55  
56  
57  
58  
59  
60

## 1 Legend to the figures

2 **Figure 1.** Flow chart showing the selection of the study population.

3  
4 **Figure 2.** Absolute risk (i.e., prevalence) and 95% confidence intervals of smoking in  
5 different intersectional strata according the National Health Survey in Sweden between 2004  
6 and 2018.

For peer review only

**Figure 1.** Flow chart showing the selection of the study population.

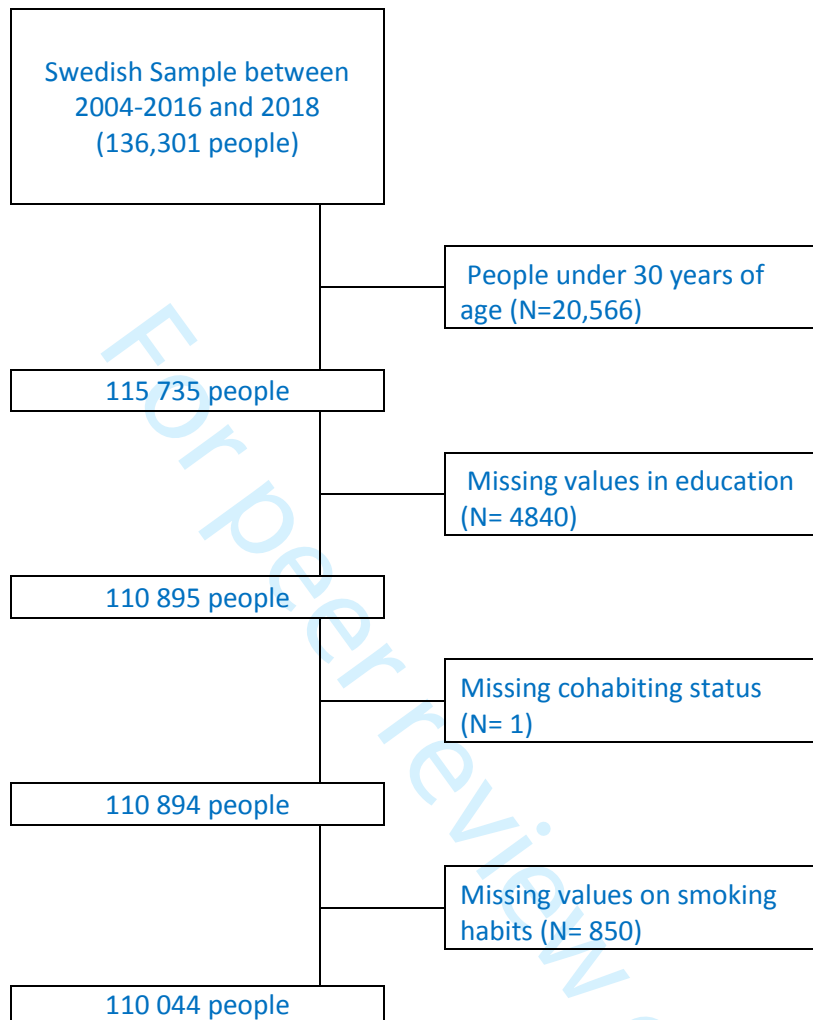

**Figure 2.** Absolute risk (i.e., prevalence) and 95% confidence intervals of smoking in different intersectional strata according the National Health Survey in Sweden between 2004 and 2018.

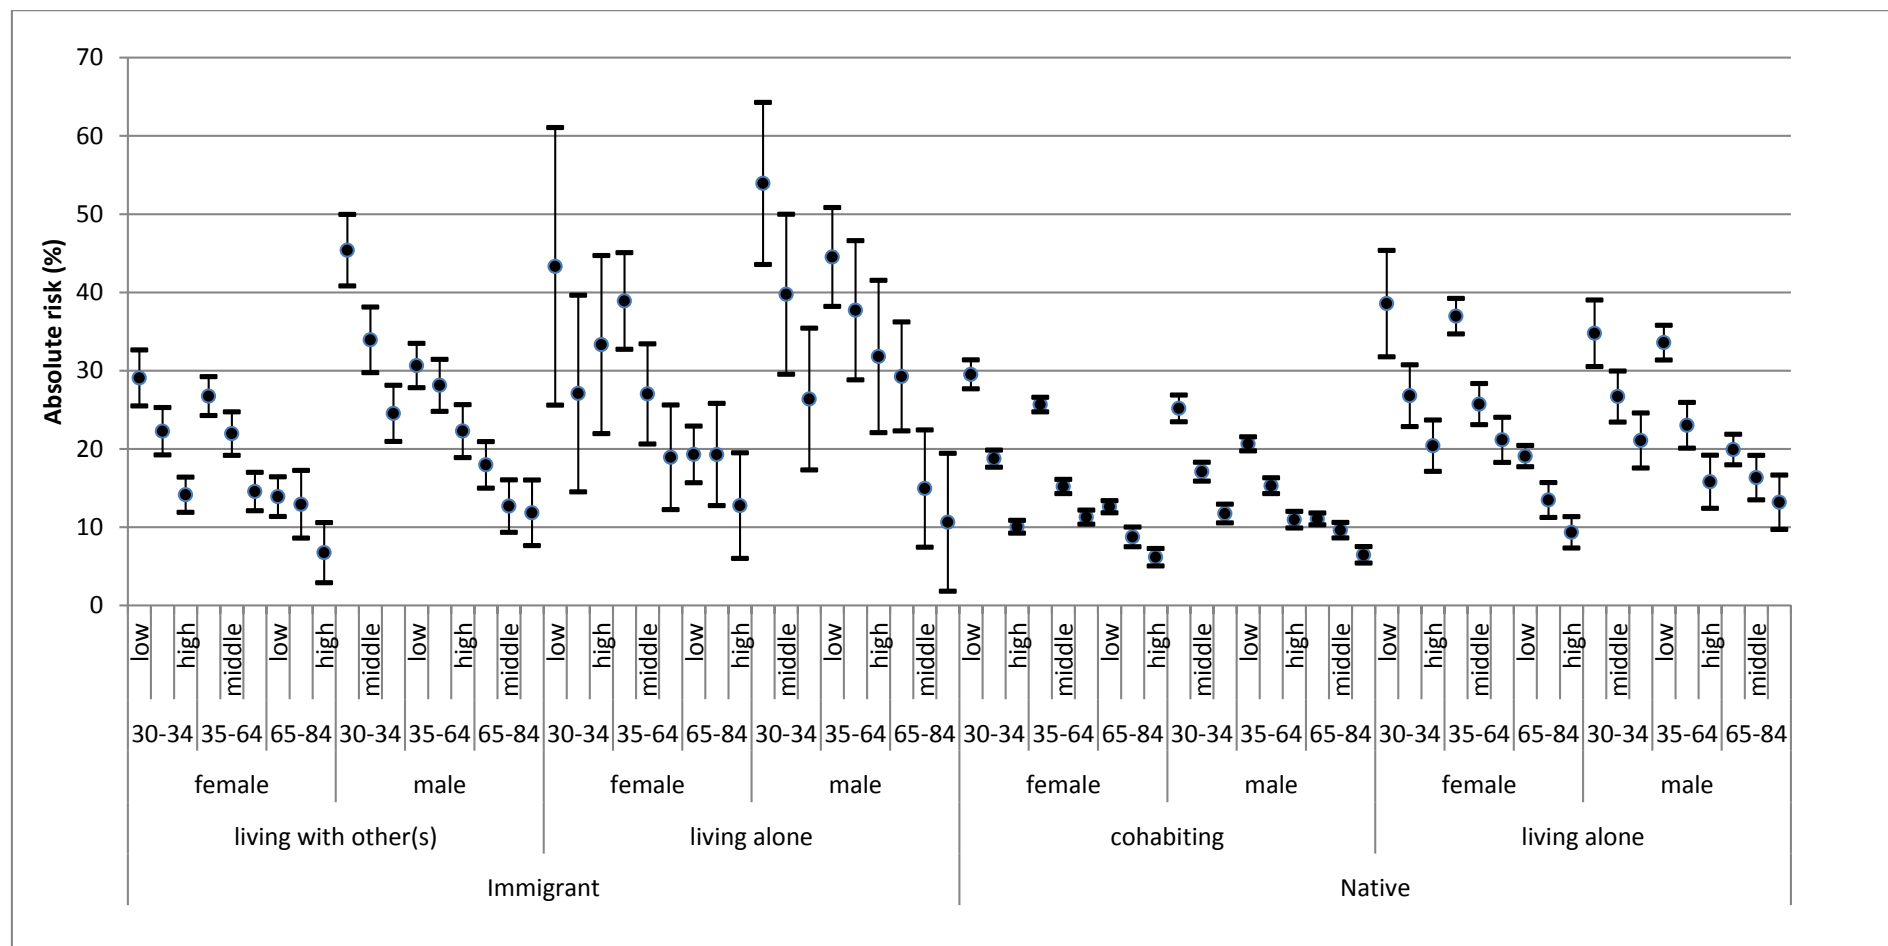

## Supplementary material 1

### S1.

Trends in smoking prevalence in the National Health Surveys for Sweden. Categories of age, gender, educational achievement, migration status and household composition are shown with different lines and 95% confidence intervals in the respective graphs.

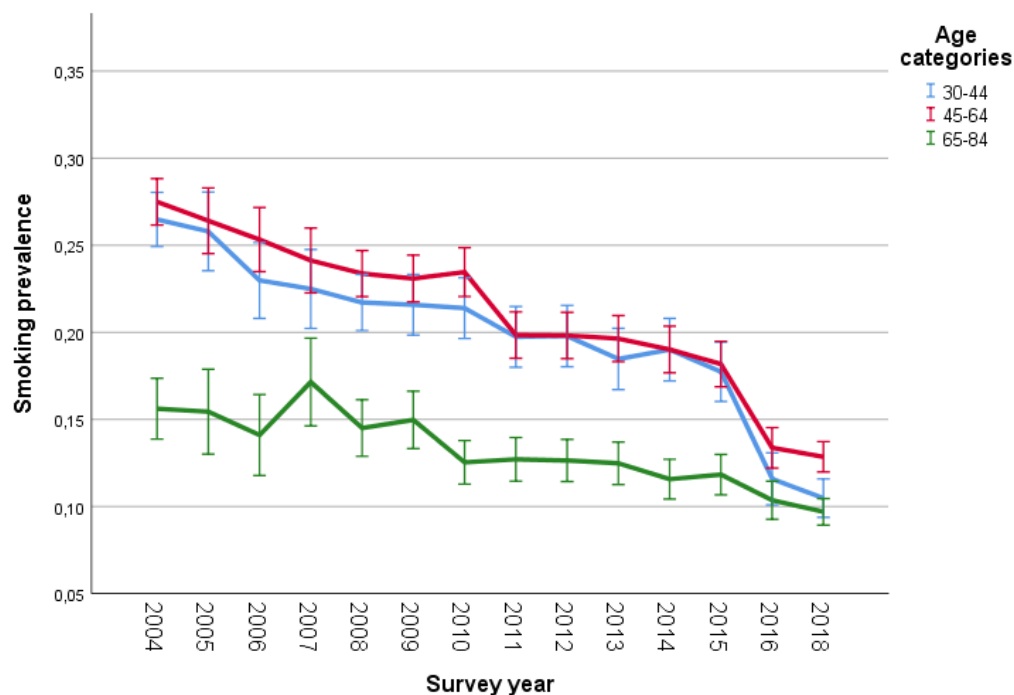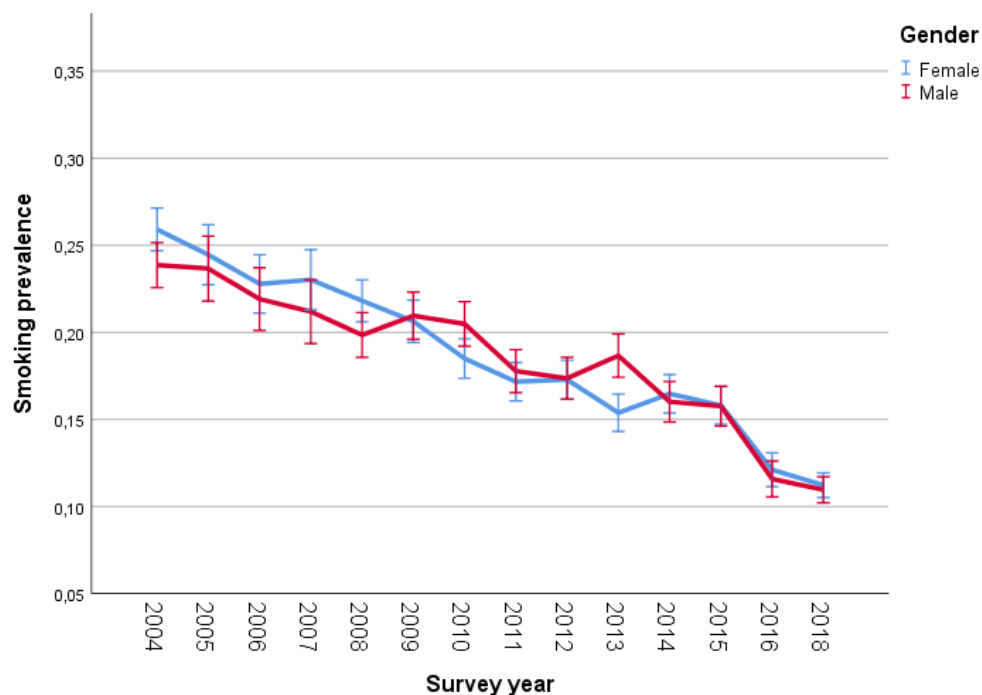

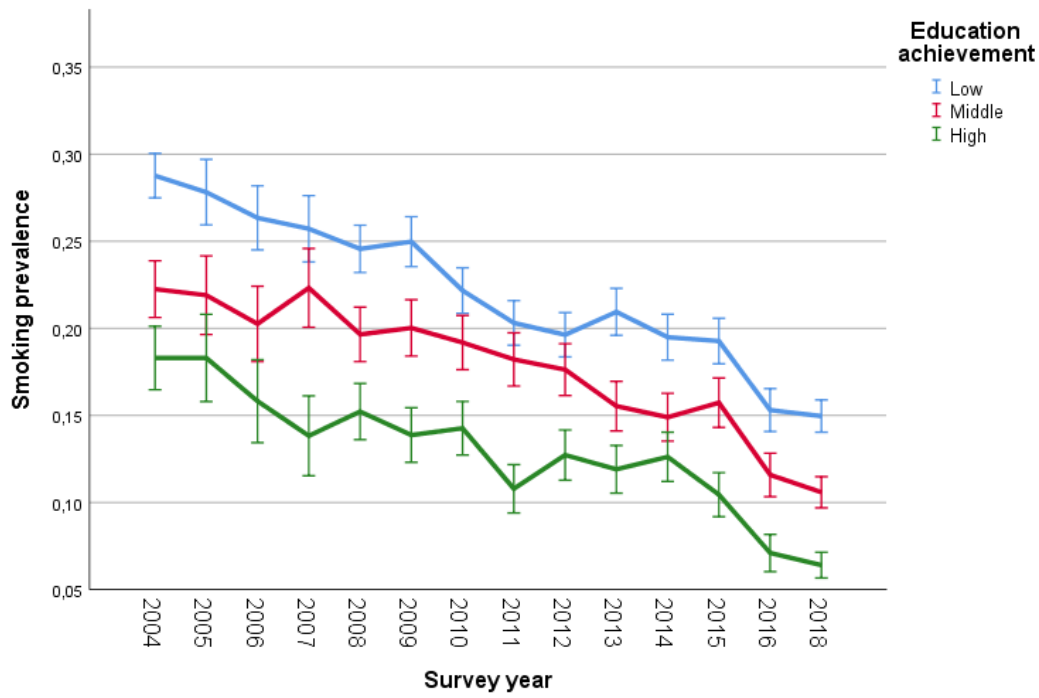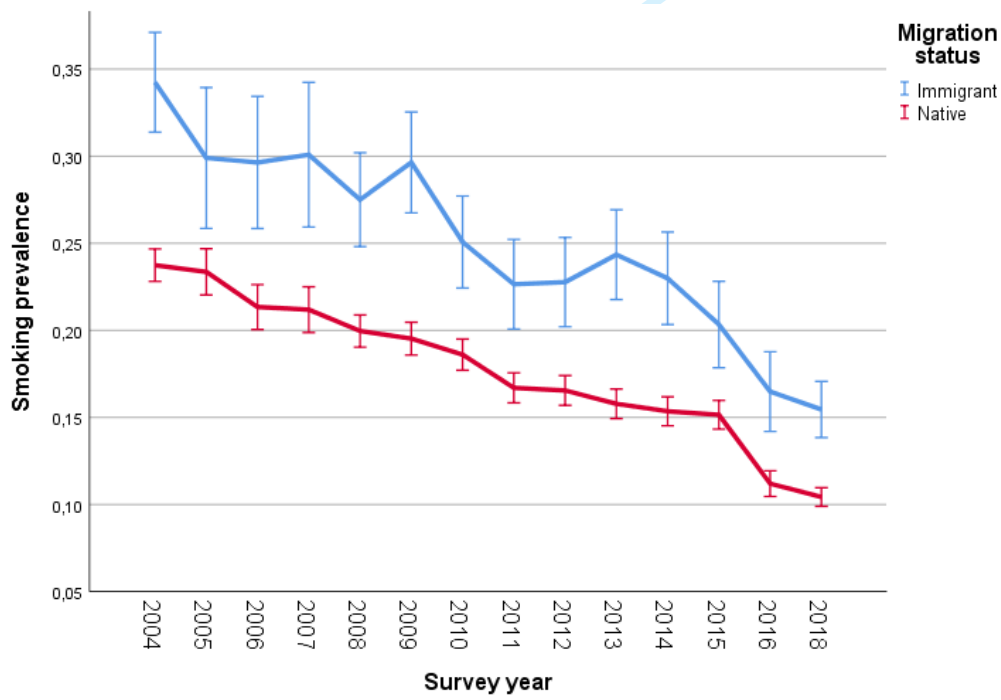

1  
2  
3  
4  
5  
6  
7  
8  
9  
10  
11  
12  
13  
14  
15  
16  
17  
18  
19  
20  
21  
22  
23  
24  
25  
26  
27  
28  
29  
30  
31  
32  
33  
34  
35  
36  
37  
38  
39  
40  
41  
42  
43  
44  
45  
46  
47  
48  
49  
50  
51  
52  
53  
54  
55  
56  
57  
58  
59  
60

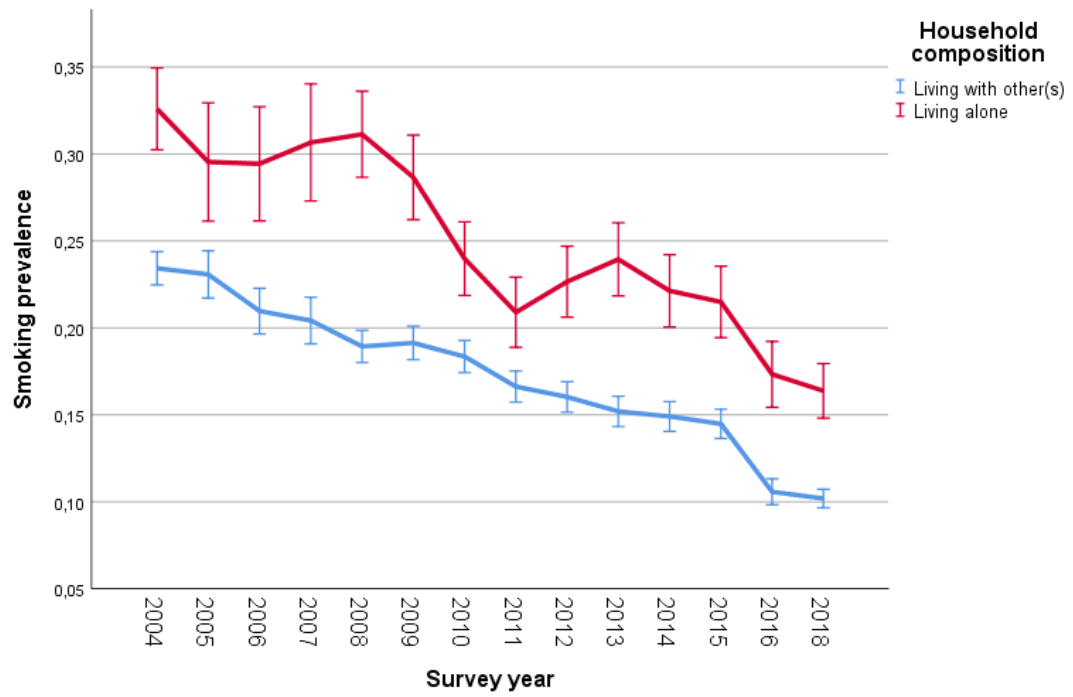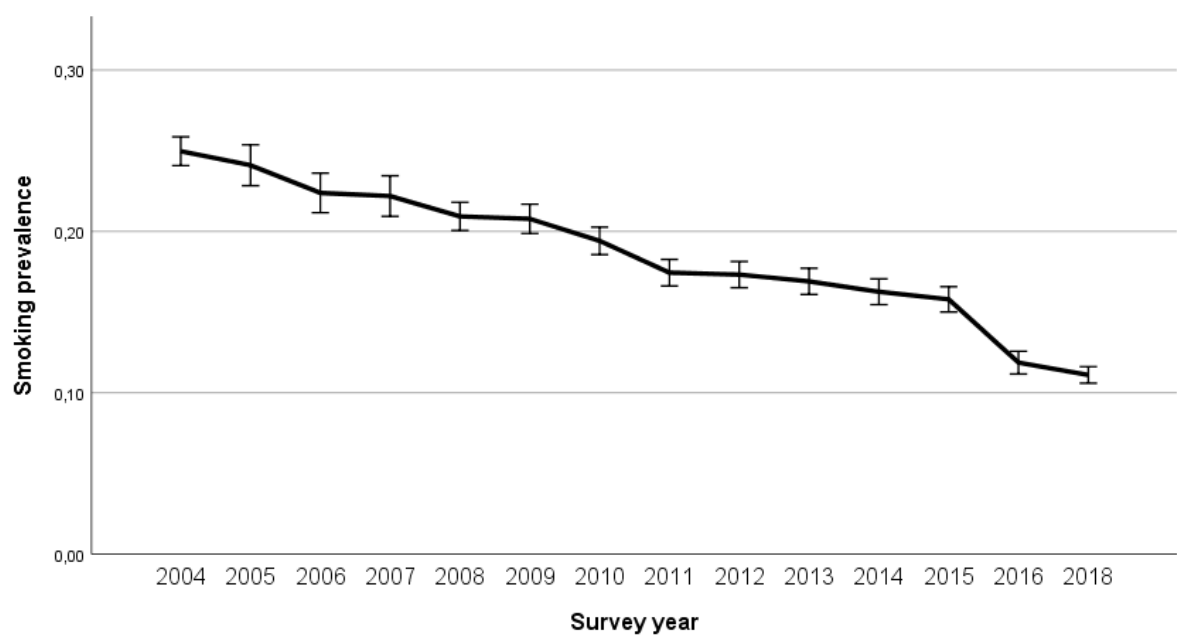

## Supplementary material 2

## S2

**Table 2, full version.** Results from the intersectional model 7 indicating the Prevalence Ratios (PR) with 95% confidence intervals (CI) of smoking across intersectional strata in the Swedish population using the stratum of young, native, men with high education that were living with other(s) (LWO) as reference in the comparisons.

| Age   | Gender | Educational achievement | Migration status | Household composition | PR (95% CI)      |
|-------|--------|-------------------------|------------------|-----------------------|------------------|
| 30-44 | Female | Low                     | Immigrant        | LWO                   | 2.35 (1.96-2.82) |
| 30-44 | Female | Low                     | Immigrant        | Living alone          | 3.41 (1.96-5.94) |
| 30-44 | Female | Low                     | Native           | LWO                   | 2.24 (1.96-2.56) |
| 30-44 | Female | Low                     | Native           | Living alone          | 2.95 (2.29-3.78) |
| 30-44 | Female | Middle                  | Immigrant        | LWO                   | 1.83 (1.51-2.21) |
| 30-44 | Female | Middle                  | Immigrant        | Living alone          | 2.33 (1.34-4.05) |
| 30-44 | Female | Middle                  | Native           | LWO                   | 1.53 (1.35-1.73) |
| 30-44 | Female | Middle                  | Native           | Living alone          | 2.2 (1.8-2.7)    |
| 30-44 | Female | High                    | Immigrant        | LWO                   | 1.22 (0.99-1.49) |
| 30-44 | Female | High                    | Immigrant        | Living alone          | 2.87 (1.86-4.42) |
| 30-44 | Female | High                    | Native           | LWO                   | 0.86 (0.74-0.98) |
| 30-44 | Female | High                    | Native           | Living alone          | 1.72 (1.39-2.12) |
| 30-44 | Male   | Low                     | Immigrant        | LWO                   | 3.66 (3.07-4.35) |
| 30-44 | Male   | Low                     | Immigrant        | Living alone          | 4.45 (3.29-6.03) |
| 30-44 | Male   | Low                     | Native           | LWO                   | 1.92 (1.68-2.2)  |
| 30-44 | Male   | Low                     | Native           | Living alone          | 2.67 (2.21-3.21) |
| 30-44 | Male   | Middle                  | Immigrant        | LWO                   | 2.84 (2.36-3.43) |
| 30-44 | Male   | Middle                  | Immigrant        | Living alone          | 3.33 (2.35-4.71) |
| 30-44 | Male   | Middle                  | Native           | LWO                   | 1.43 (1.25-1.63) |
| 30-44 | Male   | Middle                  | Native           | Living alone          | 2.21 (1.85-2.64) |
| 30-44 | Male   | High                    | Immigrant        | LWO                   | 2.13 (1.74-2.6)  |
| 30-44 | Male   | High                    | Immigrant        | Living alone          | 2.32 (1.53-3.5)  |
| 30-44 | Male   | High                    | Native           | LWO                   | Reference        |

|    |       |        |        |           |              |                  |
|----|-------|--------|--------|-----------|--------------|------------------|
| 1  |       |        |        |           |              |                  |
| 2  |       |        |        |           |              |                  |
| 3  | 30-44 | Male   | High   | Native    | Living alone | 1.75 (1.41-2.18) |
| 4  |       |        |        |           |              |                  |
| 5  | 45-64 | Female | Low    | Immigrant | LWO          | 2.19 (1.88-2.55) |
| 6  |       |        |        |           |              |                  |
| 7  | 45-64 | Female | Low    | Immigrant | Living alone | 3.22 (2.56-4.06) |
| 8  |       |        |        |           |              |                  |
| 9  | 45-64 | Female | Low    | Native    | LWO          | 2.08 (1.85-2.34) |
| 10 |       |        |        |           |              |                  |
| 11 | 45-64 | Female | Low    | Native    | Living alone | 2.99 (2.61-3.41) |
| 12 |       |        |        |           |              |                  |
| 13 | 45-64 | Female | Middle | Immigrant | LWO          | 1.87 (1.56-2.23) |
| 14 |       |        |        |           |              |                  |
| 15 | 45-64 | Female | Middle | Immigrant | Living alone | 2.23 (1.66-3.01) |
| 16 |       |        |        |           |              |                  |
| 17 | 45-64 | Female | Middle | Native    | LWO          | 1.29 (1.14-1.46) |
| 18 |       |        |        |           |              |                  |
| 19 | 45-64 | Female | Middle | Native    | Living alone | 2.16 (1.84-2.53) |
| 20 |       |        |        |           |              |                  |
| 21 | 45-64 | Female | High   | Immigrant | LWO          | 1.27 (1.03-1.57) |
| 22 |       |        |        |           |              |                  |
| 23 | 45-64 | Female | High   | Immigrant | Living alone | 1.63 (1.08-2.45) |
| 24 |       |        |        |           |              |                  |
| 25 | 45-64 | Female | High   | Native    | LWO          | 0.97 (0.84-1.11) |
| 26 |       |        |        |           |              |                  |
| 27 | 45-64 | Female | High   | Native    | Living alone | 1.76 (1.46-2.13) |
| 28 |       |        |        |           |              |                  |
| 29 | 45-64 | Male   | Low    | Immigrant | LWO          | 2.55 (2.18-2.98) |
| 30 |       |        |        |           |              |                  |
| 31 | 45-64 | Male   | Low    | Immigrant | Living alone | 3.61 (2.9-4.5)   |
| 32 |       |        |        |           |              |                  |
| 33 | 45-64 | Male   | Low    | Native    | LWO          | 1.71 (1.52-1.93) |
| 34 |       |        |        |           |              |                  |
| 35 | 45-64 | Male   | Low    | Native    | Living alone | 2.77 (2.42-3.17) |
| 36 |       |        |        |           |              |                  |
| 37 | 45-64 | Male   | Middle | Immigrant | LWO          | 2.39 (2.01-2.86) |
| 38 |       |        |        |           |              |                  |
| 39 | 45-64 | Male   | Middle | Immigrant | Living alone | 3.1 (2.26-4.26)  |
| 40 |       |        |        |           |              |                  |
| 41 | 45-64 | Male   | Middle | Native    | LWO          | 1.28 (1.12-1.45) |
| 42 |       |        |        |           |              |                  |
| 43 | 45-64 | Male   | Middle | Native    | Living alone | 1.92 (1.61-2.31) |
| 44 |       |        |        |           |              |                  |
| 45 | 45-64 | Male   | High   | Immigrant | LWO          | 1.91 (1.56-2.35) |
| 46 |       |        |        |           |              |                  |
| 47 | 45-64 | Male   | High   | Immigrant | Living alone | 2.7 (1.84-3.98)  |
| 48 |       |        |        |           |              |                  |
| 49 | 45-64 | Male   | High   | Native    | LWO          | 0.92 (0.8-1.07)  |
| 50 |       |        |        |           |              |                  |
| 51 | 45-64 | Male   | High   | Native    | Living alone | 1.35 (1.04-1.75) |
| 52 |       |        |        |           |              |                  |
| 53 | 65-84 | Female | Low    | Immigrant | LWO          | 1.23 (0.98-1.54) |
| 54 |       |        |        |           |              |                  |
| 55 | 65-84 | Female | Low    | Immigrant | Living alone | 1.62 (1.28-2.05) |
| 56 |       |        |        |           |              |                  |
| 57 | 65-84 | Female | Low    | Native    | LWO          | 1.1 (0.97-1.25)  |
| 58 |       |        |        |           |              |                  |
| 59 | 65-84 | Female | Low    | Native    | Living alone | 1.62 (1.42-1.86) |
| 60 |       |        |        |           |              |                  |



|       |        |        |           |              |                  |
|-------|--------|--------|-----------|--------------|------------------|
| 65-84 | Female | Middle | Immigrant | LWO          | 1.18 (0.81-1.71) |
| 65-84 | Female | Middle | Immigrant | Living alone | 1.66 (1.12-2.46) |
| 65-84 | Female | Middle | Native    | LWO          | 0.8 (0.66-0.96)  |
| 65-84 | Female | Middle | Native    | Living alone | 1.2 (0.97-1.48)  |
| 65-84 | Female | High   | Immigrant | LWO          | 0.61 (0.33-1.11) |
| 65-84 | Female | High   | Immigrant | Living alone | 1.16 (0.65-2.07) |
| 65-84 | Female | High   | Native    | LWO          | 0.55 (0.45-0.69) |
| 65-84 | Female | High   | Native    | Living alone | 0.83 (0.64-1.06) |
| 65-84 | Male   | Low    | Immigrant | LWO          | 1.57 (1.27-1.95) |
| 65-84 | Male   | Low    | Immigrant | Living alone | 2.49 (1.84-3.37) |
| 65-84 | Male   | Low    | Native    | LWO          | 0.96 (0.84-1.1)  |
| 65-84 | Male   | Low    | Native    | Living alone | 1.71 (1.47-2)    |
| 65-84 | Male   | Middle | Immigrant | LWO          | 1.12 (0.82-1.51) |
| 65-84 | Male   | Middle | Immigrant | Living alone | 1.29 (0.74-2.24) |
| 65-84 | Male   | Middle | Native    | LWO          | 0.85 (0.73-0.99) |
| 65-84 | Male   | Middle | Native    | Living alone | 1.47 (1.18-1.83) |
| 65-84 | Male   | High   | Immigrant | LWO          | 1.06 (0.72-1.57) |
| 65-84 | Male   | High   | Immigrant | Living alone | 0.91 (0.38-2.21) |
| 65-84 | Male   | High   | Native    | LWO          | 0.58 (0.48-0.71) |
| 65-84 | Male   | High   | Native    | Living alone | 1.19 (0.88-1.6)  |

### Supplementary material 3 S3

Sensitivity analysis where income tertiles were used as indicators of socioeconomic position instead of educational achievement.

**Table 1.** Results from the intersectional model 7 indicating the 10 highest and 10 lowest Prevalence Ratio (PR) with 95% confidence intervals (CI) of smoking across intersectional strata in the Swedish population using the stratum of young, native, men with high income that were living with other(s) (LWO) as reference in the comparisons.

| Age                        | Gender      | Income      | Migration status | Civil status | RR (95% CI)      |
|----------------------------|-------------|-------------|------------------|--------------|------------------|
| 65-84                      | Male        | High        | Immigrant        | LWO          | 0.51 (0.07-3.61) |
| 65-84                      | Female      | High        | Immigrant        | Living alone | 0.64 (0.37-1.08) |
| 65-84                      | Male        | High        | Native           | Living alone | 0.64 (0.55-0.74) |
| 65-84                      | Female      | High        | Native           | Living alone | 0.66 (0.56-0.78) |
| 65-84                      | Female      | High        | Native           | LWO          | 0.71 (0.45-1.12) |
| 65-84                      | Male        | Middle      | Native           | Living alone | 0.74 (0.65-0.83) |
| 65-84                      | Female      | Middle      | Native           | Living alone | 0.76 (0.67-0.86) |
| 65-84                      | Male        | High        | Immigrant        | Living alone | 0.77 (0.51-1.15) |
| 65-84                      | Male        | Low         | Native           | Living alone | 0.87 (0.76-0.99) |
| 65-84                      | Male        | High        | Native           | LWO          | 0.91 (0.57-1.46) |
| <b>30-44</b>               | <b>Male</b> | <b>High</b> | <b>Native</b>    | <b>LWO</b>   | <b>Reference</b> |
| 30-44                      | Male        | High        | Immigrant        | Living alone | 2.37 (0.98-5.73) |
| 45-64                      | Male        | Low         | Immigrant        | LWO          | 2.53 (2.14-2.98) |
| 65-84                      | Female      | High        | Immigrant        | Living alone | 2.58 (0.96-6.89) |
| 30-44                      | Female      | High        | Immigrant        | Living alone | 2.62 (0.98-7.02) |
| 45-64                      | Male        | Middle      | Immigrant        | Living alone | 2.63 (1.86-3.7)  |
| 30-44                      | Female      | Low         | Immigrant        | Living alone | 2.64 (1.89-3.68) |
| 30-44                      | Male        | Middle      | Immigrant        | Living alone | 2.66 (1.74-4.08) |
| 30-44                      | Male        | Low         | Immigrant        | LWO          | 2.73 (2.32-3.2)  |
| 30-44                      | Male        | Low         | Immigrant        | Living alone | 2.94 (2.31-3.74) |
| 45-64                      | Male        | Low         | Immigrant        | Living alone | 2.96 (2.45-3.58) |
| AUC                        |             |             |                  |              | 0.65             |
| ΔAUC compared with model 6 |             |             |                  |              | 0.01             |

**Table 2.** Prevalence ratios (PR) and 95%-confidence intervals (CI), of smoking among people aged 30-84 included in the National Health Surveys between 2004 and 2018 in relation to survey year, age, gender, income, migration- and household composition. Model 7 includes the same variables as model 6 but as a multicategorical variable, The PRs for model 7 are presented in the table 1. AUC-values with 95%CI representing the discriminatory accuracy and  $\Delta$ AUC-values of the models are also presented.

|               | Model 1          | Model 2          | Model 3          | Model 4          | Model 5          | Model 6          |
|---------------|------------------|------------------|------------------|------------------|------------------|------------------|
| <b>Year</b>   |                  |                  |                  |                  |                  |                  |
| 2004          | 2.25 (2.11-2.40) | 2.08 (1.95-2.21) | 2.08 (1.95-2.21) | 1.85 (1.74-1.98) | 1.88 (1.76-2.00) | 1.84 (1.73-1.97) |
| 2005          | 2.17 (2.01-2.35) | 2.01 (1.86-1.17) | 2.01 (1.95-2.21) | 1.83 (1.69-1.98) | 1.85 (1.71-2.00) | 1.83 (1.69-1.98) |
| 2006          | 2.02 (1.86-2.18) | 1.87 (1.72-2.02) | 1.87 (1.72-2.02) | 1.70 (1.57-1.84) | 1.71 (1.58-1.85) | 1.68 (1.55-1.82) |
| 2007          | 2.00 (1.84-2.17) | 1.86 (1.71-2.01) | 1.86 (1.71-2.01) | 1.71 (1.57-1.85) | 1.73 (1.59-1.87) | 1.70 (1.56-1.84) |
| 2008          | 1.89 (1.76-2.02) | 1.76 (1.64-1.88) | 1.76 (1.64-1.88) | 1.64 (1.53-1.75) | 1.65 (1.54-1.77) | 1.63 (1.52-1.74) |
| 2009          | 1.87 (1.75-2.01) | 1.75 (1.64-1.88) | 1.76 (1.64-1.88) | 1.65 (1.54-1.77) | 1.66 (1.55-1.78) | 1.63 (1.52-1.75) |
| 2010          | 1.75 (1.63-1.87) | 1.70 (1.58-1.82) | 1.70 (1.58-1.82) | 1.61 (1.50-1.72) | 1.62 (1.51-1.73) | 1.59 (1.48-1.70) |
| 2011          | 1.57 (1.46-1.69) | 1.53 (1.43-1.64) | 1.53 (1.43-1.64) | 1.45 (1.35-1.56) | 1.46 (1.36-1.57) | 1.43 (1.33-1.54) |
| 2012          | 1.56 (1.45-1.68) | 1.53 (1.42-1.64) | 1.53 (1.42-1.64) | 1.47 (1.37-1.57) | 1.47 (1.37-1.58) | 1.44 (1.34-1.55) |
| 2013          | 1.52 (1.42-1.64) | 1.49 (1.39-1.60) | 1.49 (1.39-1.60) | 1.45 (1.35-1.55) | 1.45 (1.35-1.56) | 1.42 (1.32-1.52) |
| 2014          | 1.46 (1.36-1.57) | 1.45 (1.35-1.56) | 1.45 (1.35-1.56) | 1.41 (1.31-1.52) | 1.42 (1.32-1.53) | 1.39 (1.30-1.50) |
| 2015          | 1.42 (1.32-1.53) | 1.40 (1.30-1.51) | 1.40 (1.30-1.51) | 1.37 (1.27-1.47) | 1.38 (1.28-1.48) | 1.35 (1.26-1.46) |
| 2016          | 1.07 (0.99-1.16) | 1.06 (0.97-1.14) | 1.06 (0.97-1.14) | 1.04 (0.96-1.13) | 1.05 (0.97-1.13) | 1.03 (0.95-1.11) |
| 2018          | Reference        | Reference        | Reference        | Reference        | Reference        | Reference        |
| <b>Age</b>    |                  |                  |                  |                  |                  |                  |
| 30-44         |                  | Reference        | Reference        | Reference        | Reference        | Reference        |
| 45-64         |                  | 1.06 (1.03-1.10) | 1.06 (1.03-1.10) | 0.94 (0.91-0.97) | 0.94 (0.91-0.98) | 0.93 (0.90-0.96) |
| 65-84         |                  | 0.68 (0.65-0.71) | 0.68 (1.86-0.71) | 0.56 (0.53-0.58) | 0.57 (0.55-0.59) | 0.53 (0.51-0.56) |
| <b>Gender</b> |                  |                  |                  |                  |                  |                  |
| Male          |                  |                  | Reference        | Reference        | Reference        | Reference        |
| Female        |                  |                  | 1.00 (0.97-1.02) | 1.02 (0.99-1.05) | 1.02 (0.99-1.05) | 1.01 (0.98-1.04) |
| <b>Income</b> |                  |                  |                  |                  |                  |                  |
| Low           |                  |                  |                  | 1.96 (1.88-2.04) | 1.96 (1.88-2.04) | 1.93 (1.86-2.01) |
| Middle        |                  |                  |                  | 1.42 (1.36-1.48) | 1.43 (1.37-1.45) | 1.42 (1.36-1.49) |
| High          |                  |                  |                  | Reference        | Reference        | Reference        |

1  
2  
3  
4  
5  
6  
7  
8  
9  
10  
11  
12  
13  
14  
15  
16  
17  
18  
19  
20  
21  
22  
23  
24  
25  
26  
27  
28  
29  
30  
31  
32  
33  
34  
35  
36  
37  
38  
39  
40  
41  
42  
43  
44  
45  
46  
47  
48  
49  
50  
51  
52  
53  
54  
55  
56  
57  
58  
59  
60

|                       |                      |                  |                  |                  |                  |                  |                  |
|-----------------------|----------------------|------------------|------------------|------------------|------------------|------------------|------------------|
| Born in Sweden        | Native               |                  |                  |                  |                  | Reference        | Reference        |
|                       | Immigrant            |                  |                  |                  |                  | 1.39 (1.34-1.45) | 1.39 (1.34-1.44) |
| Household composition | Living alone         |                  |                  |                  |                  |                  | 1.53 (1.48-1.58) |
|                       | Living with other(s) |                  |                  |                  |                  |                  | Reference        |
| AUC                   |                      | 0.58 (0.58-0.59) | 0.60 (0.60-0.61) | 0.60 (0.60-0.61) | 0.64 (0.63-0.64) | 0.64 (0.64-0.64) | 0.64 (0.64-0.65) |
| $\Delta$ AUC          |                      | -                | 0.02             | 0.00             | 0.04             | 0.00             | 0.01             |

1  
2  
3  
4  
5  
6  
7  
8  
9  
10  
11  
12  
13  
14  
15  
16  
17  
18  
19  
20  
21  
22  
23  
24  
25  
26  
27  
28  
29  
30  
31  
32  
33  
34  
35  
36  
37  
38  
39  
40  
41  
42  
43  
44  
45  
46  
47  
48  
49  
50  
51  
52  
53  
54  
55  
56  
57  
58  
59  
60

For peer review only

## Supplementary material 4

**S4.** Smoking prevalence across regions of birth among 110 044 individuals responding National Health Surveys during 2004 – 2016 and 2018. Both everyday smokers and sometimes smokers are included in the proportions presented.

| Region of birth  | Women | Men   |
|------------------|-------|-------|
| Sweden           | 17.5% | 16.4% |
| Nordic countries | 21.7% | 23.0% |
| Europe           | 24.0% | 27.1% |
| Outside Europe   | 16.3% | 32.5% |

For peer review only

STROBE Statement for manuscript entitled “Understanding the Complexity of Socioeconomic Disparities in smoking prevalence: Combining Intersectionality theory with analysis of individual heterogeneity and discriminatory accuracy (AIHDA)”

|                              | Item No | Recommendation                                                                                                                                                                                    |              |
|------------------------------|---------|---------------------------------------------------------------------------------------------------------------------------------------------------------------------------------------------------|--------------|
| <b>Title and abstract</b>    | 1       | (a) Indicate the study’s design with a commonly used term in the title or the abstract                                                                                                            | ✓ p1         |
|                              |         | (b) Provide in the abstract an informative and balanced summary of what was done and what was found                                                                                               | ✓ p2         |
| <b>Introduction</b>          |         |                                                                                                                                                                                                   |              |
| Background/rationale         | 2       | Explain the scientific background and rationale for the investigation being reported                                                                                                              | ✓ p5-7       |
| Objectives                   | 3       | State specific objectives, including any prespecified hypotheses                                                                                                                                  | ✓ p7         |
| <b>Methods</b>               |         |                                                                                                                                                                                                   |              |
| Study design                 | 4       | Present key elements of study design early in the paper                                                                                                                                           | ✓ p7-8       |
| Setting                      | 5       | Describe the setting, locations, and relevant dates, including periods of recruitment, exposure, follow-up, and data collection                                                                   | ✓ p7-8       |
| Participants                 | 6       | (a) Give the eligibility criteria, and the sources and methods of selection of participants                                                                                                       | ✓ p8         |
| Variables                    | 7       | Clearly define all outcomes, exposures, predictors, potential confounders, and effect modifiers. Give diagnostic criteria, if applicable                                                          | ✓ p8-9       |
| Data sources/<br>measurement | 8*      | For each variable of interest, give sources of data and details of methods of assessment (measurement). Describe comparability of assessment methods if there is more than one group              | ✓ p9         |
| Bias                         | 9       | Describe any efforts to address potential sources of bias                                                                                                                                         | ✓ p15-17     |
| Study size                   | 10      | Explain how the study size was arrived at                                                                                                                                                         | NA           |
| Quantitative<br>variables    | 11      | Explain how quantitative variables were handled in the analyses. If applicable, describe which groupings were chosen and why                                                                      | ✓ p8-9       |
| Statistical methods          | 12      | (a) Describe all statistical methods, including those used to control for confounding                                                                                                             | ✓p9 -11      |
|                              |         | (b) Describe any methods used to examine subgroups and interactions                                                                                                                               | ✓ 11         |
|                              |         | (c) Explain how missing data were addressed                                                                                                                                                       | ✓p8,15       |
|                              |         | (d) If applicable, describe analytical methods taking account of sampling strategy                                                                                                                | NA           |
|                              |         | (e) Describe any sensitivity analyses                                                                                                                                                             | ✓ 14-16      |
| <b>Results</b>               |         |                                                                                                                                                                                                   |              |
| Participants                 | 13*     | (a) Report numbers of individuals at each stage of study—eg numbers potentially eligible, examined for eligibility, confirmed eligible, included in the study, completing follow-up, and analysed | ✓ p7-8       |
|                              |         | (b) Give reasons for non-participation at each stage                                                                                                                                              | ✓ p8         |
|                              |         | (c) Consider use of a flow diagram                                                                                                                                                                | ✓ Fig.1      |
| Descriptive data             | 14*     | (a) Give characteristics of study participants (eg demographic, clinical, social) and information on exposures and potential confounders                                                          | ✓, S.4       |
|                              |         | (b) Indicate number of participants with missing data for each variable of interest                                                                                                               | NA, excluded |

1  
2  
3  
4  
5  
6  
7  
8  
9  
10  
11  
12  
13  
14  
15  
16  
17  
18  
19  
20  
21  
22  
23  
24  
25  
26  
27  
28  
29  
30  
31  
32  
33  
34  
35  
36  
37  
38  
39  
40  
41  
42  
43  
44  
45  
46  
47  
48  
49  
50  
51  
52  
53  
54  
55  
56  
57  
58  
59  
60

|                          |     |                                                                                                                                                                                                              |                   |
|--------------------------|-----|--------------------------------------------------------------------------------------------------------------------------------------------------------------------------------------------------------------|-------------------|
| Outcome data             | 15* | Report numbers of outcome events or summary measures                                                                                                                                                         | ✓ p11             |
| Main results             | 16  | (a) Give unadjusted estimates and, if applicable, confounder-adjusted estimates and their precision (eg, 95% confidence interval). Make clear which confounders were adjusted for and why they were included | ✓ fig.2, tab2, S2 |
|                          |     | (b) Report category boundaries when continuous variables were categorized                                                                                                                                    | ✓ 8               |
|                          |     | (c) If relevant, consider translating estimates of relative risk into absolute risk for a meaningful time period                                                                                             | NA                |
| Other analyses           | 17  | Report other analyses done—eg analyses of subgroups and interactions, and sensitivity analyses                                                                                                               | ✓ 15-17           |
| <b>Discussion</b>        |     |                                                                                                                                                                                                              |                   |
| Key results              | 18  | Summarise key results with reference to study objectives                                                                                                                                                     | ✓ p13-14          |
| Limitations              | 19  | Discuss limitations of the study, taking into account sources of potential bias or imprecision. Discuss both direction and magnitude of any potential bias                                                   | ✓ p15-16          |
| Interpretation           | 20  | Give a cautious overall interpretation of results considering objectives, limitations, multiplicity of analyses, results from similar studies, and other relevant evidence                                   | ✓ p13-16          |
| Generalisability         | 21  | Discuss the generalisability (external validity) of the study results                                                                                                                                        | ✓ p16             |
| <b>Other information</b> |     |                                                                                                                                                                                                              |                   |
| Funding                  | 22  | Give the source of funding and the role of the funders for the present study and, if applicable, for the original study on which the present article is based                                                | ✓ p18-19          |

\*Give information separately for exposed and unexposed groups.

**Note:** An Explanation and Elaboration article discusses each checklist item and gives methodological background and published examples of transparent reporting. The STROBE checklist is best used in conjunction with this article (freely available on the Web sites of PLoS Medicine at <http://www.plosmedicine.org/>, Annals of Internal Medicine at <http://www.annals.org/>, and Epidemiology at <http://www.epidem.com/>). Information on the STROBE Initiative is available at [www.strobe-statement.org](http://www.strobe-statement.org).
