# Supplementary material for: Understanding the complexity of socioeconomic disparities in smoking prevalence in Sweden: a cross-sectional study applying intersectionality theory
Source: PubMed Central journal article supplement (PMC7880088; doi:10.1136/bmjopen-2020-042323), 2021-02-11

## Supplementary material 1

### S1.

Trends in smoking prevalence in the National Health Surveys for Sweden. Categories of age, gender, educational achievement, migration status and household composition are shown with different lines and 95% confidence intervals in the respective graphs.

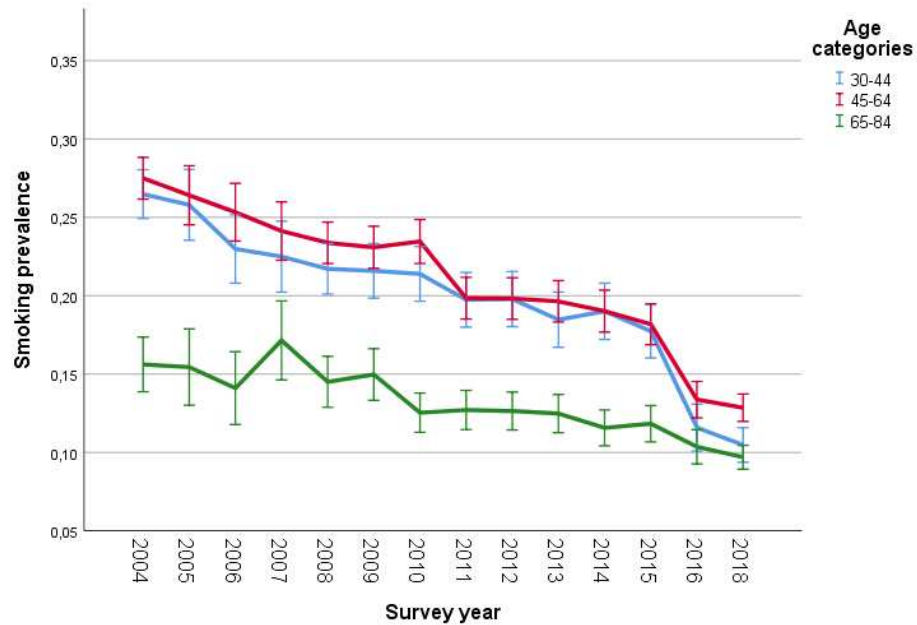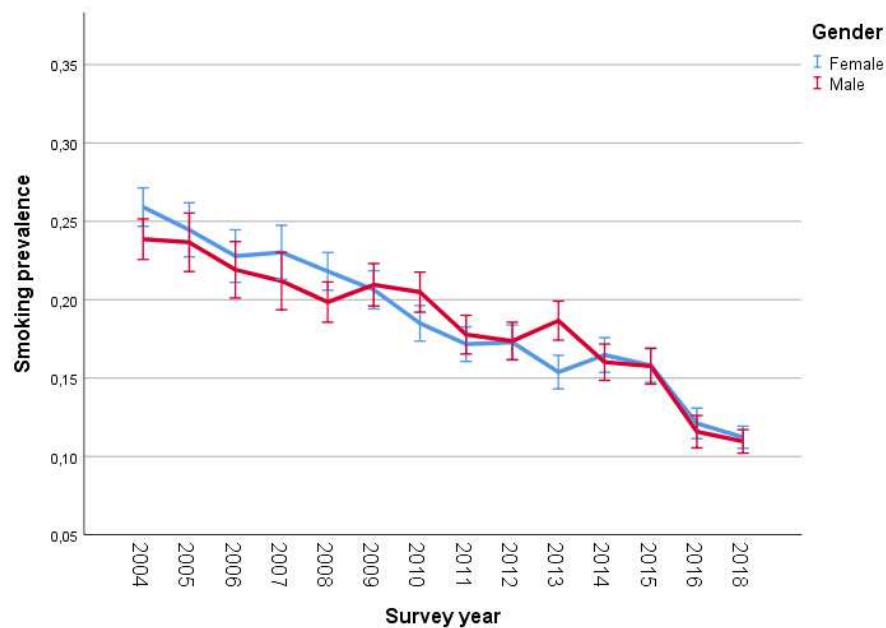

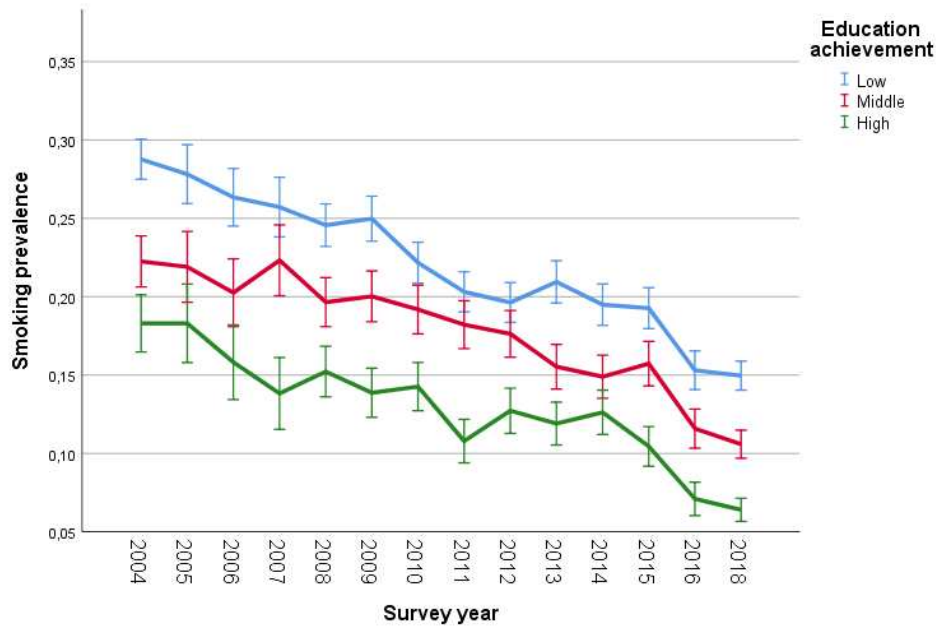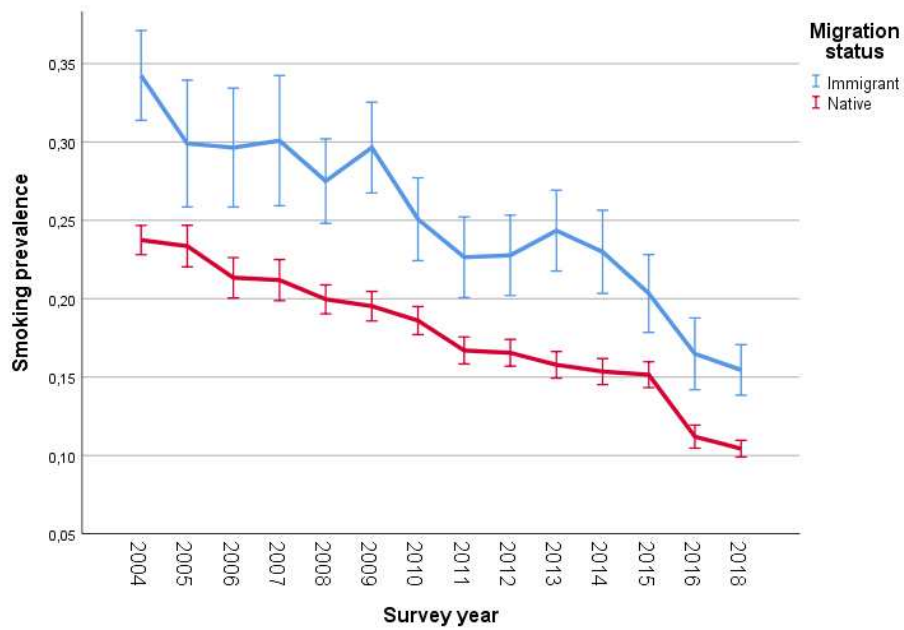

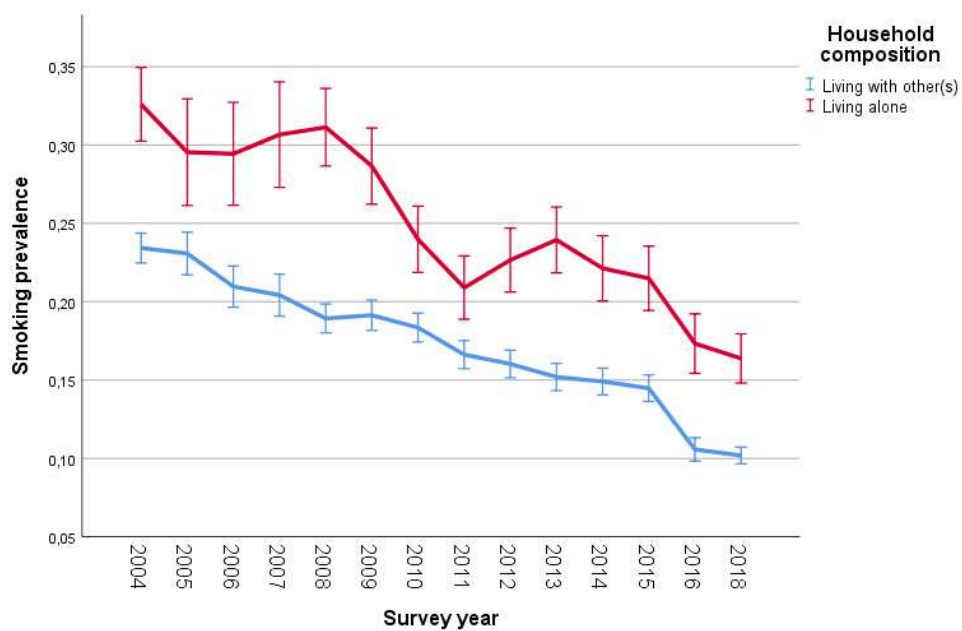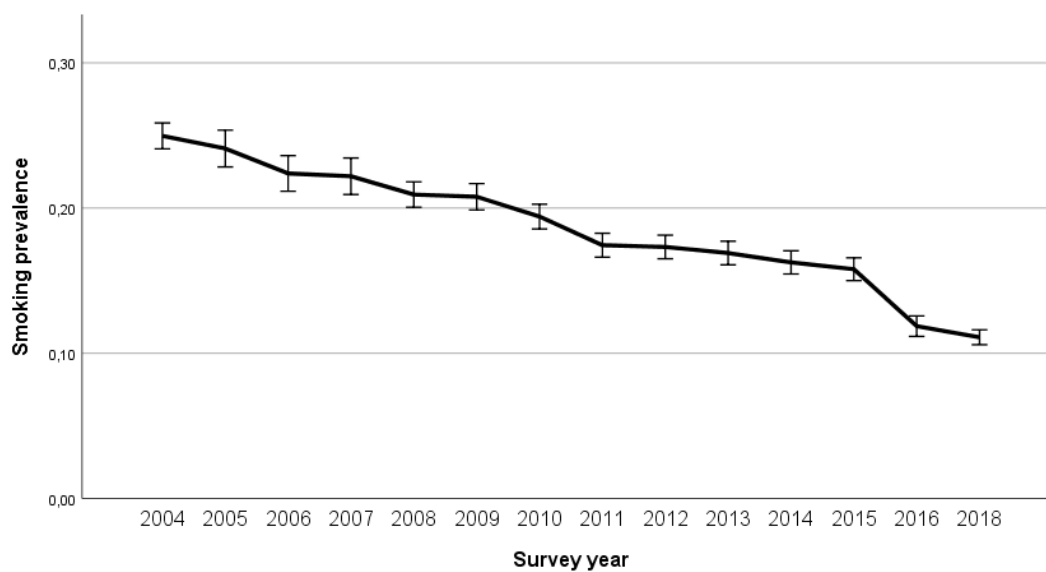

Supplement: bmjopen-2020-042323supp001.pdf [file bmjopen-2020-042323supp001.pdf]
