# Supplementary material for: Understanding the complexity of socioeconomic disparities in smoking prevalence in Sweden: a cross-sectional study applying intersectionality theory
Source: PubMed Central journal article supplement (PMC7880088; doi:10.1136/bmjopen-2020-042323), 2021-02-11
Supplement: bmjopen-2020-042323supp002.pdf [file bmjopen-2020-042323supp002.pdf]

## Supplementary material 2

## S2

**Table 2, full version.** Results from the intersectional model 7 indicating the Prevalence Ratios (PR) with 95% confidence intervals (CI) of smoking across intersectional strata in the Swedish population using the stratum of young, native, men with high education that were living with other(s) (LWO) as reference in the comparisons.

| Age   | Gender | Educational achievement | Migration status | Household composition | PR (95% CI)      |
|-------|--------|-------------------------|------------------|-----------------------|------------------|
| 30-44 | Female | Low                     | Immigrant        | LWO                   | 2.35 (1.96-2.82) |
| 30-44 | Female | Low                     | Immigrant        | Living alone          | 3.41 (1.96-5.94) |
| 30-44 | Female | Low                     | Native           | LWO                   | 2.24 (1.96-2.56) |
| 30-44 | Female | Low                     | Native           | Living alone          | 2.95 (2.29-3.78) |
| 30-44 | Female | Middle                  | Immigrant        | LWO                   | 1.83 (1.51-2.21) |
| 30-44 | Female | Middle                  | Immigrant        | Living alone          | 2.33 (1.34-4.05) |
| 30-44 | Female | Middle                  | Native           | LWO                   | 1.53 (1.35-1.73) |
| 30-44 | Female | Middle                  | Native           | Living alone          | 2.2 (1.8-2.7)    |
| 30-44 | Female | High                    | Immigrant        | LWO                   | 1.22 (0.99-1.49) |
| 30-44 | Female | High                    | Immigrant        | Living alone          | 2.87 (1.86-4.42) |
| 30-44 | Female | High                    | Native           | LWO                   | 0.86 (0.74-0.98) |
| 30-44 | Female | High                    | Native           | Living alone          | 1.72 (1.39-2.12) |
| 30-44 | Male   | Low                     | Immigrant        | LWO                   | 3.66 (3.07-4.35) |
| 30-44 | Male   | Low                     | Immigrant        | Living alone          | 4.45 (3.29-6.03) |
| 30-44 | Male   | Low                     | Native           | LWO                   | 1.92 (1.68-2.2)  |
| 30-44 | Male   | Low                     | Native           | Living alone          | 2.67 (2.21-3.21) |
| 30-44 | Male   | Middle                  | Immigrant        | LWO                   | 2.84 (2.36-3.43) |
| 30-44 | Male   | Middle                  | Immigrant        | Living alone          | 3.33 (2.35-4.71) |
| 30-44 | Male   | Middle                  | Native           | LWO                   | 1.43 (1.25-1.63) |
| 30-44 | Male   | Middle                  | Native           | Living alone          | 2.21 (1.85-2.64) |
| 30-44 | Male   | High                    | Immigrant        | LWO                   | 2.13 (1.74-2.6)  |
| 30-44 | Male   | High                    | Immigrant        | Living alone          | 2.32 (1.53-3.5)  |
| 30-44 | Male   | High                    | Native           | LWO                   | Reference        |

|       |        |        |           |              |                  |
|-------|--------|--------|-----------|--------------|------------------|
| 30-44 | Male   | High   | Native    | Living alone | 1.75 (1.41-2.18) |
| 45-64 | Female | Low    | Immigrant | LWO          | 2.19 (1.88-2.55) |
| 45-64 | Female | Low    | Immigrant | Living alone | 3.22 (2.56-4.06) |
| 45-64 | Female | Low    | Native    | LWO          | 2.08 (1.85-2.34) |
| 45-64 | Female | Low    | Native    | Living alone | 2.99 (2.61-3.41) |
| 45-64 | Female | Middle | Immigrant | LWO          | 1.87 (1.56-2.23) |
| 45-64 | Female | Middle | Immigrant | Living alone | 2.23 (1.66-3.01) |
| 45-64 | Female | Middle | Native    | LWO          | 1.29 (1.14-1.46) |
| 45-64 | Female | Middle | Native    | Living alone | 2.16 (1.84-2.53) |
| 45-64 | Female | High   | Immigrant | LWO          | 1.27 (1.03-1.57) |
| 45-64 | Female | High   | Immigrant | Living alone | 1.63 (1.08-2.45) |
| 45-64 | Female | High   | Native    | LWO          | 0.97 (0.84-1.11) |
| 45-64 | Female | High   | Native    | Living alone | 1.76 (1.46-2.13) |
| 45-64 | Male   | Low    | Immigrant | LWO          | 2.55 (2.18-2.98) |
| 45-64 | Male   | Low    | Immigrant | Living alone | 3.61 (2.9-4.5)   |
| 45-64 | Male   | Low    | Native    | LWO          | 1.71 (1.52-1.93) |
| 45-64 | Male   | Low    | Native    | Living alone | 2.77 (2.42-3.17) |
| 45-64 | Male   | Middle | Immigrant | LWO          | 2.39 (2.01-2.86) |
| 45-64 | Male   | Middle | Immigrant | Living alone | 3.1 (2.26-4.26)  |
| 45-64 | Male   | Middle | Native    | LWO          | 1.28 (1.12-1.45) |
| 45-64 | Male   | Middle | Native    | Living alone | 1.92 (1.61-2.31) |
| 45-64 | Male   | High   | Immigrant | LWO          | 1.91 (1.56-2.35) |
| 45-64 | Male   | High   | Immigrant | Living alone | 2.7 (1.84-3.98)  |
| 45-64 | Male   | High   | Native    | LWO          | 0.92 (0.8-1.07)  |
| 45-64 | Male   | High   | Native    | Living alone | 1.35 (1.04-1.75) |
| 65-84 | Female | Low    | Immigrant | LWO          | 1.23 (0.98-1.54) |
| 65-84 | Female | Low    | Immigrant | Living alone | 1.62 (1.28-2.05) |
| 65-84 | Female | Low    | Native    | LWO          | 1.1 (0.97-1.25)  |
| 65-84 | Female | Low    | Native    | Living alone | 1.62 (1.42-1.86) |

---

|       |        |        |           |              |                  |
|-------|--------|--------|-----------|--------------|------------------|
| 65-84 | Female | Middle | Immigrant | LWO          | 1.18 (0.81-1.71) |
| 65-84 | Female | Middle | Immigrant | Living alone | 1.66 (1.12-2.46) |
| 65-84 | Female | Middle | Native    | LWO          | 0.8 (0.66-0.96)  |
| 65-84 | Female | Middle | Native    | Living alone | 1.2 (0.97-1.48)  |
| 65-84 | Female | High   | Immigrant | LWO          | 0.61 (0.33-1.11) |
| 65-84 | Female | High   | Immigrant | Living alone | 1.16 (0.65-2.07) |
| 65-84 | Female | High   | Native    | LWO          | 0.55 (0.45-0.69) |
| 65-84 | Female | High   | Native    | Living alone | 0.83 (0.64-1.06) |
| 65-84 | Male   | Low    | Immigrant | LWO          | 1.57 (1.27-1.95) |
| 65-84 | Male   | Low    | Immigrant | Living alone | 2.49 (1.84-3.37) |
| 65-84 | Male   | Low    | Native    | LWO          | 0.96 (0.84-1.1)  |
| 65-84 | Male   | Low    | Native    | Living alone | 1.71 (1.47-2)    |
| 65-84 | Male   | Middle | Immigrant | LWO          | 1.12 (0.82-1.51) |
| 65-84 | Male   | Middle | Immigrant | Living alone | 1.29 (0.74-2.24) |
| 65-84 | Male   | Middle | Native    | LWO          | 0.85 (0.73-0.99) |
| 65-84 | Male   | Middle | Native    | Living alone | 1.47 (1.18-1.83) |
| 65-84 | Male   | High   | Immigrant | LWO          | 1.06 (0.72-1.57) |
| 65-84 | Male   | High   | Immigrant | Living alone | 0.91 (0.38-2.21) |
| 65-84 | Male   | High   | Native    | LWO          | 0.58 (0.48-0.71) |
| 65-84 | Male   | High   | Native    | Living alone | 1.19 (0.88-1.6)  |

---
