# Supplementary material for: Understanding the complexity of socioeconomic disparities in smoking prevalence in Sweden: a cross-sectional study applying intersectionality theory
Source: PubMed Central journal article supplement (PMC7880088; doi:10.1136/bmjopen-2020-042323), 2021-02-11
Supplement: bmjopen-2020-042323supp003.pdf [file bmjopen-2020-042323supp003.pdf]

## Supplementary material 3

### S3

Sensitivity analysis where income tertiles were used as indicators of socioeconomic position instead of educational achievement.

**Table 1.** Results from the intersectional model 7 indicating the 10 highest and 10 lowest Prevalence Ratio (PR) with 95% confidence intervals (CI) of smoking across intersectional strata in the Swedish population using the stratum of young, native, men with high income that were living with other(s) (LWO) as reference in the comparisons.

| Age                        | Gender      | Income      | Migration status | Civil status | PR (95% CI)      |
|----------------------------|-------------|-------------|------------------|--------------|------------------|
| 65-84                      | Male        | High        | Immigrant        | LWO          | 0.51 (0.07-3.61) |
| 65-84                      | Female      | High        | Immigrant        | Living alone | 0.64 (0.37-1.08) |
| 65-84                      | Male        | High        | Native           | Living alone | 0.64 (0.55-0.74) |
| 65-84                      | Female      | High        | Native           | Living alone | 0.66 (0.56-0.78) |
| 65-84                      | Female      | High        | Native           | LWO          | 0.71 (0.45-1.12) |
| 65-84                      | Male        | Middle      | Native           | Living alone | 0.74 (0.65-0.83) |
| 65-84                      | Female      | Middle      | Native           | Living alone | 0.76 (0.67-0.86) |
| 65-84                      | Male        | High        | Immigrant        | Living alone | 0.77 (0.51-1.15) |
| 65-84                      | Male        | Low         | Native           | Living alone | 0.87 (0.76-0.99) |
| 65-84                      | Male        | High        | Native           | LWO          | 0.91 (0.57-1.46) |
| <b>30-44</b>               | <b>Male</b> | <b>High</b> | <b>Native</b>    | <b>LWO</b>   | <b>Reference</b> |
| 30-44                      | Male        | High        | Immigrant        | Living alone | 2.37 (0.98-5.73) |
| 45-64                      | Male        | Low         | Immigrant        | LWO          | 2.53 (2.14-2.98) |
| 65-84                      | Female      | High        | Immigrant        | Living alone | 2.58 (0.96-6.89) |
| 30-44                      | Female      | High        | Immigrant        | Living alone | 2.62 (0.98-7.02) |
| 45-64                      | Male        | Middle      | Immigrant        | Living alone | 2.63 (1.86-3.7)  |
| 30-44                      | Female      | Low         | Immigrant        | Living alone | 2.64 (1.89-3.68) |
| 30-44                      | Male        | Middle      | Immigrant        | Living alone | 2.66 (1.74-4.08) |
| 30-44                      | Male        | Low         | Immigrant        | LWO          | 2.73 (2.32-3.2)  |
| 30-44                      | Male        | Low         | Immigrant        | Living alone | 2.94 (2.31-3.74) |
| 45-64                      | Male        | Low         | Immigrant        | Living alone | 2.96 (2.45-3.58) |
| AUC                        |             |             |                  |              | 0.65             |
| ΔAUC compared with model 6 |             |             |                  |              | 0.01             |

**Table 2.** Prevalence ratios (PR) and 95%-confidence intervals (CI), of smoking among people aged 30-84 included in the National Health Surveys between 2004 and 2018 in relation to survey year, age, gender, income, migration- and household composition. Model 7 includes the same variables as model 6 but as a multicategorical variable, The PRs for model 7 are presented in the table 1. AUC-values with 95%CI representing the discriminatory accuracy and  $\Delta$ AUC-values of the models are also presented.

|               | Model 1          | Model 2          | Model 3          | Model 4          | Model 5          | Model 6          |
|---------------|------------------|------------------|------------------|------------------|------------------|------------------|
| <b>Year</b>   |                  |                  |                  |                  |                  |                  |
| 2004          | 2.25 (2.11-2.40) | 2.08 (1.95-2.21) | 2.08 (1.95-2.21) | 1.85 (1.74-1.98) | 1.88 (1.76-2.00) | 1.84 (1.73-1.97) |
| 2005          | 2.17 (2.01-2.35) | 2.01 (1.86-1.17) | 2.01 (1.95-2.21) | 1.83 (1.69-1.98) | 1.85 (1.71-2.00) | 1.83 (1.69-1.98) |
| 2006          | 2.02 (1.86-2.18) | 1.87 (1.72-2.02) | 1.87 (1.72-2.02) | 1.70 (1.57-1.84) | 1.71 (1.58-1.85) | 1.68 (1.55-1.82) |
| 2007          | 2.00 (1.84-2.17) | 1.86 (1.71-2.01) | 1.86 (1.71-2.01) | 1.71 (1.57-1.85) | 1.73 (1.59-1.87) | 1.70 (1.56-1.84) |
| 2008          | 1.89 (1.76-2.02) | 1.76 (1.64-1.88) | 1.76 (1.64-1.88) | 1.64 (1.53-1.75) | 1.65 (1.54-1.77) | 1.63 (1.52-1.74) |
| 2009          | 1.87 (1.75-2.01) | 1.75 (1.64-1.88) | 1.76 (1.64-1.88) | 1.65 (1.54-1.77) | 1.66 (1.55-1.78) | 1.63 (1.52-1.75) |
| 2010          | 1.75 (1.63-1.87) | 1.70 (1.58-1.82) | 1.70 (1.58-1.82) | 1.61 (1.50-1.72) | 1.62 (1.51-1.73) | 1.59 (1.48-1.70) |
| 2011          | 1.57 (1.46-1.69) | 1.53 (1.43-1.64) | 1.53 (1.43-1.64) | 1.45 (1.35-1.56) | 1.46 (1.36-1.57) | 1.43 (1.33-1.54) |
| 2012          | 1.56 (1.45-1.68) | 1.53 (1.42-1.64) | 1.53 (1.42-1.64) | 1.47 (1.37-1.57) | 1.47 (1.37-1.58) | 1.44 (1.34-1.55) |
| 2013          | 1.52 (1.42-1.64) | 1.49 (1.39-1.60) | 1.49 (1.39-1.60) | 1.45 (1.35-1.55) | 1.45 (1.35-1.56) | 1.42 (1.32-1.52) |
| 2014          | 1.46 (1.36-1.57) | 1.45 (1.35-1.56) | 1.45 (1.35-1.56) | 1.41 (1.31-1.52) | 1.42 (1.32-1.53) | 1.39 (1.30-1.50) |
| 2015          | 1.42 (1.32-1.53) | 1.40 (1.30-1.51) | 1.40 (1.30-1.51) | 1.37 (1.27-1.47) | 1.38 (1.28-1.48) | 1.35 (1.26-1.46) |
| 2016          | 1.07 (0.99-1.16) | 1.06 (0.97-1.14) | 1.06 (0.97-1.14) | 1.04 (0.96-1.13) | 1.05 (0.97-1.13) | 1.03 (0.95-1.11) |
| 2018          | Reference        | Reference        | Reference        | Reference        | Reference        | Reference        |
| <b>Age</b>    |                  |                  |                  |                  |                  |                  |
| 30-44         |                  | Reference        | Reference        | Reference        | Reference        | Reference        |
| 45-64         |                  | 1.06 (1.03-1.10) | 1.06 (1.03-1.10) | 0.94 (0.91-0.97) | 0.94 (0.91-0.98) | 0.93 (0.90-0.96) |
| 65-84         |                  | 0.68 (0.65-0.71) | 0.68 (1.86-0.71) | 0.56 (0.53-0.58) | 0.57 (0.55-0.59) | 0.53 (0.51-0.56) |
| <b>Gender</b> |                  |                  |                  |                  |                  |                  |
| Male          |                  |                  | Reference        | Reference        | Reference        | Reference        |
| Female        |                  |                  | 1.00 (0.97-1.02) | 1.02 (0.99-1.05) | 1.02 (0.99-1.05) | 1.01 (0.98-1.04) |
| <b>Income</b> |                  |                  |                  |                  |                  |                  |
| Low           |                  |                  |                  | 1.96 (1.88-2.04) | 1.96 (1.88-2.04) | 1.93 (1.86-2.01) |
| Middle        |                  |                  |                  | 1.42 (1.36-1.48) | 1.43 (1.37-1.45) | 1.42 (1.36-1.49) |
| High          |                  |                  |                  | Reference        | Reference        | Reference        |

|                       |                      |                  |                  |                  |                  |                  |                  |
|-----------------------|----------------------|------------------|------------------|------------------|------------------|------------------|------------------|
| Born in Sweden        | Native               |                  |                  |                  |                  | Reference        | Reference        |
|                       | Immigrant            |                  |                  |                  |                  | 1.39 (1.34-1.45) | 1.39 (1.34-1.44) |
| Household composition | Living alone         |                  |                  |                  |                  |                  | 1.53 (1.48-1.58) |
|                       | Living with other(s) |                  |                  |                  |                  |                  | Reference        |
| AUC                   |                      | 0.58 (0.58-0.59) | 0.60 (0.60-0.61) | 0.60 (0.60-0.61) | 0.64 (0.63-0.64) | 0.64 (0.64-0.64) | 0.64 (0.64-0.65) |
| $\Delta$ AUC          |                      | -                | 0.02             | 0.00             | 0.04             | 0.00             | 0.01             |
