# Supplementary material for: Understanding the complexity of socioeconomic disparities in smoking prevalence in Sweden: a cross-sectional study applying intersectionality theory
Source: PubMed Central journal article supplement (PMC7880088; doi:10.1136/bmjopen-2020-042323), 2021-02-11
Supplement: bmjopen-2020-042323supp004.pdf [file bmjopen-2020-042323supp004.pdf]

## Supplementary material 4

**S4.** Smoking prevalence across regions of birth among 110 044 individuals responding National Health Surveys during 2004 – 2016 and 2018. Both everyday smokers and sometimes smokers are included in the proportions presented.

| Region of birth  | Women | Men   |
|------------------|-------|-------|
| Sweden           | 17.5% | 16.4% |
| Nordic countries | 21.7% | 23.0% |
| Europe           | 24.0% | 27.1% |
| Outside Europe   | 16.3% | 32.5% |
